# Supplementary material for: Copper-catalyzed direct C–H arylation of pyridine N-oxides with arylboronic esters: one-pot synthesis of 2-arylpyridines
Source: Royal Society of Chemistry journal article supplement (doi:10.1039/c3cc48767a), 2014-01-01
Supplement: c3cc48767a.pdf [file c3cc48767a.pdf]

## Supporting Information

### Copper-catalyzed direct C-H arylation of pyridine *N*-oxides with arylboronic esters: one-pot synthesis of 2-arylpyridines.

Yan Shen, Jiuxi Chen,\* Miaochang Liu, Jinchang Ding, Wenxia Gao, Xiaobo Huang and Huayue Wu\*

College of Chemistry & Materials Engineering, Wenzhou University, Wenzhou 325035, P. R. China

Email: [jiuxichen@wzu.edu.cn](mailto:jiuxichen@wzu.edu.cn); [huayuewu@wzu.edu.cn](mailto:huayuewu@wzu.edu.cn)

### List of Contents

|                                                                          |     |
|--------------------------------------------------------------------------|-----|
| 1. General experimental details.....                                     | S2  |
| 2. General procedure.....                                                | S2  |
| 3. Screening optimal conditions.....                                     | S3  |
| 4. The reaction of other organoborons with pyridine <i>N</i> -oxide..... | S4  |
| 5. Control experiments.....                                              | S5  |
| 6. Kinetic isotope competition experiment.....                           | S7  |
| 7. Analytical data for products.....                                     | S9  |
| 8. Copies of product <sup>1</sup> H NMR and <sup>13</sup> C NMR.....     | S18 |

## 1. General experimental details

Chemicals were either purchased or purified by standard techniques without special instructions.  $^1\text{H}$  NMR and  $^{13}\text{C}$  NMR spectra were measured on a 500 MHz Bruker spectrometer, using  $\text{CDCl}_3$  as the solvent with tetramethylsilane (TMS) as the internal standard at room temperature. Chemical shifts are given in  $\delta$  relative to TMS, the coupling constants  $J$  are given in Hz. All reactions were conducted under air atmosphere. Column chromatography was performed using EM Silica gel 60 (300-400 mesh). All products are known compounds and identified by comparison with authentic samples. Analytical data and spectra ( $^1\text{H}$  and  $^{13}\text{C}$  NMR) of all compounds are supplied in the Supporting Information.

## 2. General procedure

Under air atmosphere, a Schlenk tube was charged with pyridine *N*-oxides (0.5 mmol), arylboronic acids or ester (1.0 mmol),  $\text{Cu}(\text{acac})_2$  (10 mol %) and dry  $t\text{BuOK}$  (1.5 mmol) in 5 mL of toluene at room temperature. After that, the mixture was stirred constantly at 110 °C (oil bath temperature) for 2 h. After the completion of the reaction, as monitored by TLC and GC-MS analysis, the reaction mixture was cooled to room temperature, diluted with ethyl acetate, then concentrated and purified by silica gel column chromatography with petroleum ether-ethyl acetate as eluent to afford the desired product **3**.

### 3. Screening optimal conditions

**Table S1** Screening optimal conditions

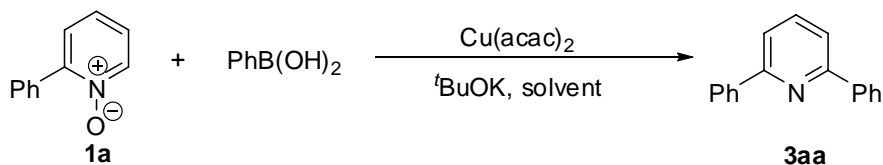

| entry | N-oxide<br>mmol | PhB(OH) <sub>2</sub><br>mmol | <sup>t</sup> BuOK<br>mmol | Cu(acac) <sub>2</sub><br>mmol | solvent            | T (°C) | yield (%) <sup>b</sup> |
|-------|-----------------|------------------------------|---------------------------|-------------------------------|--------------------|--------|------------------------|
| 1     | 0.5             | 1.0                          | 1.5                       | 10%                           | xylene             | 110    | 48                     |
| 2     | 0.5             | 1.0                          | 1.5                       | 10%                           | dioxane            | 110    | trace                  |
| 3     | 0.5             | 1.0                          | 1.5                       | 10%                           | THF                | 110    | trace                  |
| 4     | 0.5             | 1.0                          | 1.5                       | 10%                           | CH <sub>3</sub> CN | 110    | trace                  |
| 5     | 0.5             | 1.0                          | 1.5                       | 10%                           | DMF                | 110    | trace                  |
| 6     | 0.5             | 1.0                          | 1.5                       | 10%                           | DMSO               | 110    | trace                  |
| 7     | 0.5             | 1.0                          | 1.5                       | 10%                           | hexane             | 110    | 65                     |
| 8     | 0.5             | 1.0                          | 1.5                       | 10%                           | toluene            | 110    | 79                     |
| 9     | 1.0             | 0.5                          | 0.5                       | 10%                           | toluene            | 110    | trace                  |
| 10    | 1.0             | 0.5                          | 1.0                       | 10%                           | toluene            | 110    | 65                     |
| 11    | 0.5             | 0.5                          | 0.5                       | 10%                           | toluene            | 110    | trace                  |
| 12    | 0.5             | 0.5                          | 1.0                       | 10%                           | toluene            | 110    | 67                     |
| 13    | 0.5             | 1.0                          | 0.5                       | 10%                           | toluene            | 110    | trace                  |
| 14    | 0.5             | 1.0                          | 1.0                       | 10%                           | toluene            | 110    | 21                     |
| 15    | 0.5             | 1.0                          | 1.5                       | 10%                           | toluene            | 110    | 79                     |
| 16    | 0.5             | 1.0                          | 2.0                       | 10%                           | toluene            | 110    | 67                     |
| 17    | 0.5             | 1.5                          | 1.5                       | 10%                           | toluene            | 110    | 53                     |
| 18    | 0.5             | 1.5                          | 2.0                       | 10%                           | toluene            | 110    | 72                     |
| 19    | 0.5             | 1.5                          | 2.5                       | 10%                           | toluene            | 110    | 76                     |
| 20    | 0.5             | 1.5                          | 3.0                       | 10%                           | toluene            | 110    | 64                     |
| 21    | 0.5             | 1.0                          | 1.5                       | 10%                           | toluene            | 50     | 23                     |
| 22    | 0.5             | 1.0                          | 1.5                       | 10%                           | toluene            | 70     | 56                     |
| 23    | 0.5             | 1.0                          | 1.5                       | 10%                           | toluene            | 90     | 64                     |
| 24    | 0.5             | 1.0                          | 1.5                       | 10%                           | toluene            | 100    | 70                     |
| 25    | 0.5             | 1.0                          | 1.5                       | 5%                            | toluene            | 110    | 59                     |
| 26    | 0.5             | 1.0                          | 1.5                       | 10%                           | toluene            | 110    | 79                     |
| 27    | 0.5             | 1.0                          | 1.5                       | 15%                           | toluene            | 110    | 63                     |
| 28    | 0.5             | 1.0                          | 1.5                       | 20%                           | toluene            | 110    | 58                     |
| 29    | 0.5             | 1.0                          | 1.5                       | 30%                           | toluene            | 110    | 56                     |
| 30    | 0.5             | 1.0                          | 1.5                       | 40%                           | toluene            | 110    | 40                     |

Reaction conditions: N-oxide, PhB(OH)<sub>2</sub>, Cu(acac)<sub>2</sub>, <sup>t</sup>BuOK, solvent (5 mL), 2 h, air. <sup>b</sup> Isolated yield.

#### 4. The reaction of other organoborons with pyridine *N*-oxide

**Table S2** The arylation of organoboron reagents with pyridine *N*-oxide<sup>a</sup>

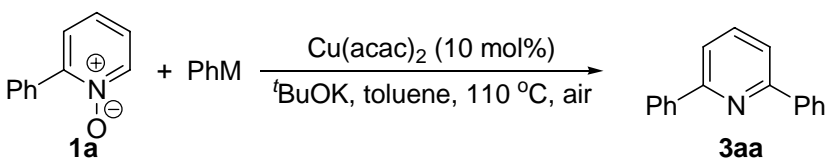

The reaction scheme shows the arylation of pyridine *N*-oxide **1a** (with a phenyl group at the 3-position) with an organoboron reagent **PhM**. The reaction is catalyzed by  $\text{Cu}(\text{acac})_2$  (10 mol%) in the presence of  $t\text{BuOK}$  in toluene at 110 °C under air. The product is 3-phenyl-5-phenylpyridine (**3aa**).

| entry | PhM (equiv based on <b>1a</b> )          | yield (%) <sup>b</sup> |
|-------|------------------------------------------|------------------------|
| 1     | $\text{PhB}(\text{OH})_2$ (2)            | 79                     |
| 2     | $(\text{PhBO})_3$ (0.7)                  | 78                     |
| 3     | $\text{NaBPh}_4$ (0.5)                   | trace                  |
| 4     | $\text{PhBF}_3\text{K}$ (2)              | trace                  |
| 5     | $\text{PhB}(\text{OR})_2$ <b>2a</b> (2)  | 87                     |
| 6     | $t\text{BuB}(\text{OH})_2$ (2)           | 0                      |
| 7     | $\text{PhCH}_2\text{B}(\text{OH})_2$ (2) | 0                      |

<sup>a</sup> Reaction conditions: **1a** (0.5 mmol), organoboron reagents,  $\text{Cu}(\text{acac})_2$  (10 mol %),  $t\text{BuOK}$  (1.5 mmol), toluene (5 mL), 110 °C, 2h, air. <sup>b</sup> Isolated yield.

## 5. Control experiments

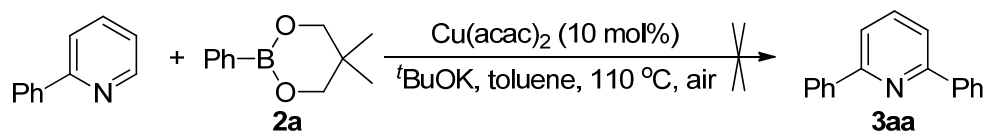

*Scheme S1*

Under air atmosphere, a Schlenk tube was charged with 2-phenylpyridine (0.5 mmol), **2a** (1.0mmol), Cu(acac)<sub>2</sub> (10 mol %) and dry <sup>t</sup>BuOK (1.5 mmol) in 5 mL of toluene at room temperature. After that, the mixture was stirred constantly at 110 °C (oil bath temperature) for 2 h. No target product was detected by GC/MS.

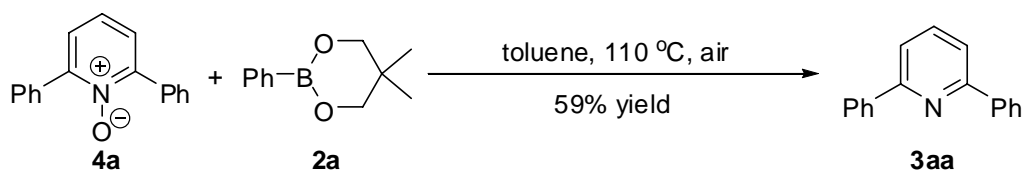

*Scheme S2*

Under air atmosphere, a Schlenk tube was charged with **4a** (0.5 mmol) and **2a** (1.0mmol) in 5 mL of toluene at room temperature. After that, the mixture was stirred constantly at 110 °C (oil bath temperature) for 2 h. The desired product **3aa** was obtained in 59% isolated yield.

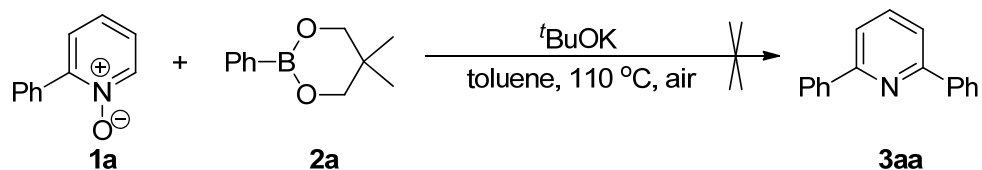

*Scheme S3*

Under air atmosphere, a Schlenk tube was charged with **1a** (0.5 mmol), **2a** (1.0mmol) and dry <sup>t</sup>BuOK (1.5 mmol) in 5 mL of toluene at room temperature. After that, the mixture was stirred constantly at 110 °C (oil bath temperature) for 2 h. No target product and trace deoxygenated starting material (2-phenylpyridine) was detected by GC/MS.

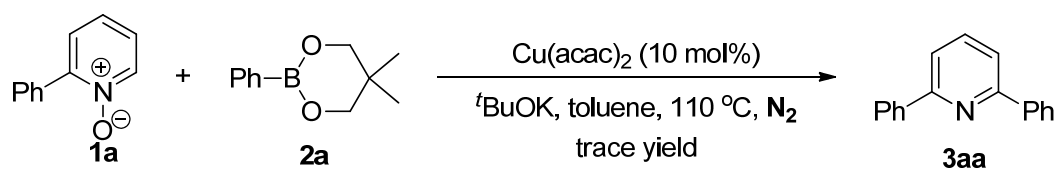

*Scheme S4*

Under N<sub>2</sub> atmosphere, a Schlenk tube was charged with **1a** (0.5 mmol), **2a** (1.0mmol), Cu(acac)<sub>2</sub> (10 mol %) and dry <sup>t</sup>BuOK (1.5 mmol) in 5 mL of toluene at room temperature. After that, the mixture was stirred constantly at 110 °C (oil bath temperature) for 2 h. Trace target product **3aa** and trace deoxygenated starting material (2-phenylpyridine) was detected by GC/MS.

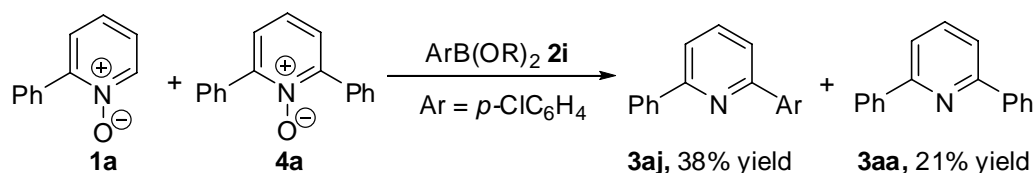

*Scheme S5*

Under air atmosphere, a Schlenk tube was charged with **1a** (0.5 mmol) and **4a** (0.5 mmol) and *p*-chlorophenylboronic ester (**2i**) (1.0 mmol), Cu(acac)<sub>2</sub> (10 mol %) and dry <sup>t</sup>BuOK (1.5 mmol) in 5 mL of toluene at room temperature. After that, the mixture was stirred constantly at 110 °C (oil bath temperature) for 2 h. After the completion of the reaction, the reaction mixture was cooled to room temperature. The result demonstrated that products **3aj** and **3aa** were observed by GC analysis in 38% and 21% yields, respectively.

## 6. Kinetic isotope competition experiment

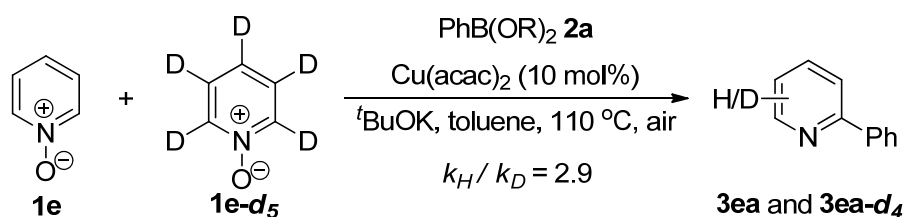

*Scheme S6 Kinetic isotope effect*

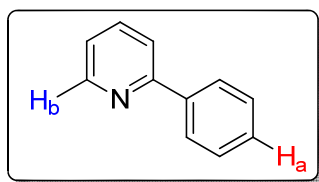

Under air atmosphere, a Schlenk tube was charged with **1e** (0.25 mmol) and **1e-d<sub>5</sub>** (0.25 mmol) and **2a** (1.0 mmol), Cu(acac)<sub>2</sub> (10 mol %) and dry <sup>t</sup>BuOK (1.5 mmol) in 5mL of toluene at room temperature. After that, the mixture was stirred constantly at 110 °C (oil bath temperature) for 2 h. After the completion of the reaction, as monitored by TLC and GC-MS analysis, the reaction mixture was cooled to room temperature, diluted with ethyl acetate, then concentrated and purified by silica gel column chromatography with petroleum ether-ethyl acetate as eluent to afford the corresponding product **3ea/3ea-d<sub>4</sub>**. The integration value of the proton  $H_a$  is used for comparison with  $H_b$ .

## Kinetic isotope competition experiment ( $^1\text{H}$ NMR)

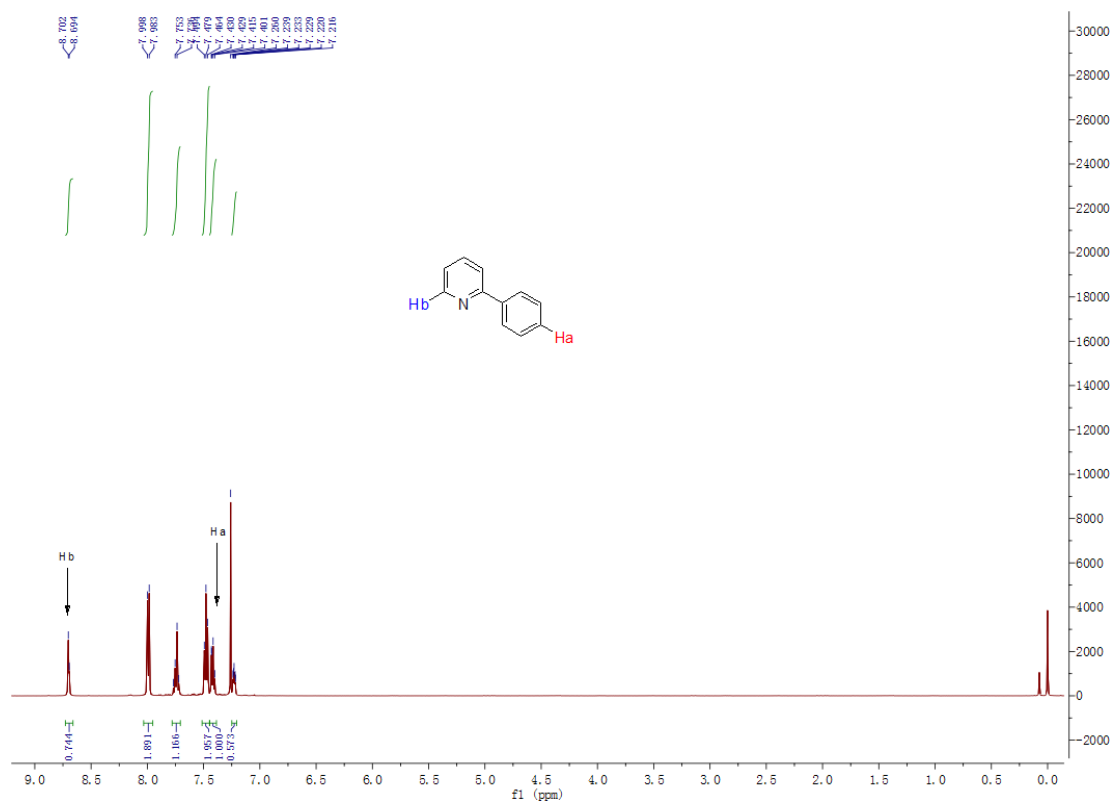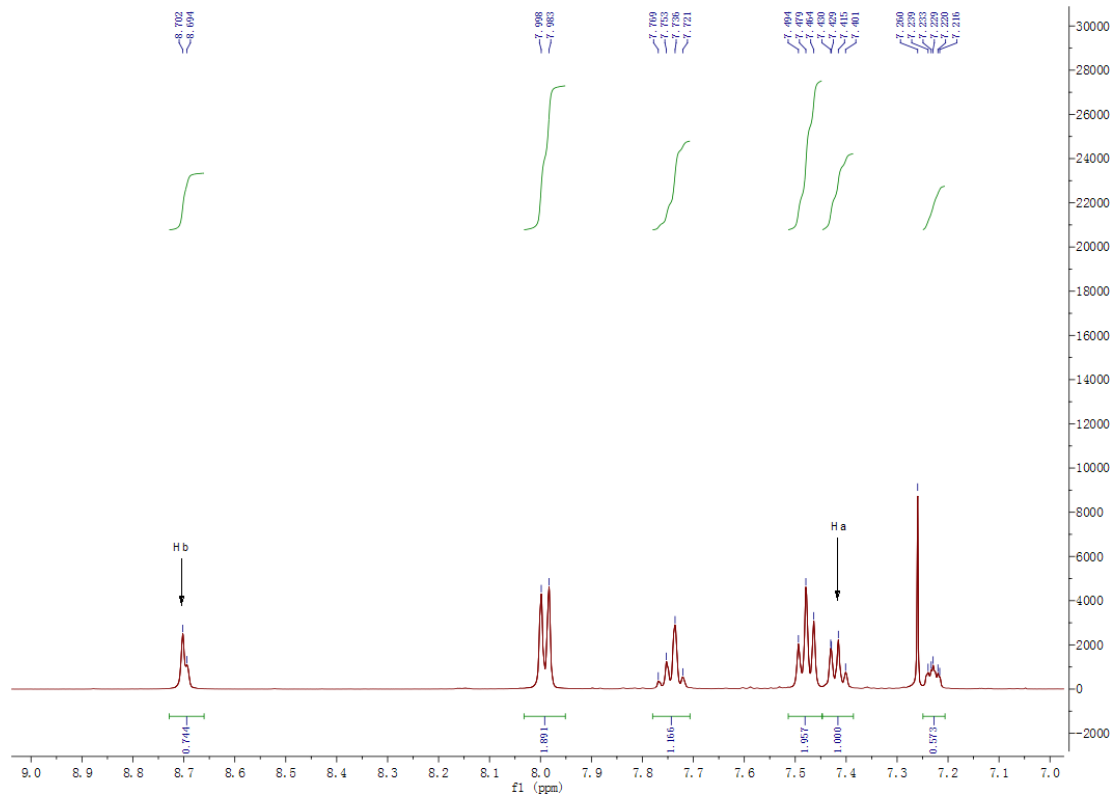



## 7. Analytical data for all products

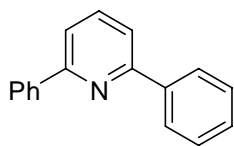

2,6-Diphenylpyridine (**3aa**): White solid, mp 81-82 °C (lit.<sup>1</sup> 79-80 °C). <sup>1</sup>H NMR (500Mz, CDCl<sub>3</sub>) δ 8.24-8.22 (m, 4H), 7.81 (dd, *J* = 7.5, 8.5 Hz, 1H), 7.72 (d, *J* = 7.5 Hz, 2H), 7.56 (t, *J* = 7.5 Hz, 4H), 7.49 (t, *J* = 7.5 Hz, 2H). <sup>13</sup>C NMR (125 Mz, CDCl<sub>3</sub>) δ 156.7, 139.4, 137.4, 128.9, 128.6, 126.9, 118.5.

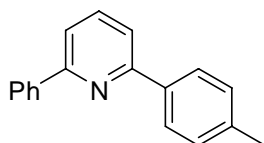

2-Phenyl-6-*p*-tolylpyridine (**3ab/3ba**): White solid, mp 91-92 °C (lit.<sup>2</sup> not reported). <sup>1</sup>H NMR (500Mz, CDCl<sub>3</sub>) δ 8.18-8.16 (m, 2H), 8.07 (d, *J* = 8.0 Hz, 2H), 7.80 (t, *J* = 8.0 Hz, 1H), 7.68 (d, *J* = 8.0 Hz, 2H), 7.53-7.50 (m, 2H), 7.46-7.43 (m, 1H), 7.32 (d, *J* = 8.0 Hz, 2H), 2.44(s, 3H). <sup>13</sup>C NMR (125 Mz, CDCl<sub>3</sub>) δ 156.8, 156.7, 139.6, 138.9, 137.4, 136.7, 129.4, 128.9, 128.6, 127.0, 126.8, 118.3, 118.2, 21.3.

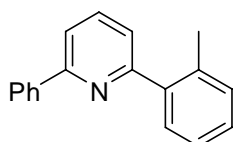

2-Phenyl-6-*o*-tolylpyridine (**3ac**): White solid, mp 63-64 °C (lit.<sup>3</sup> not reported). <sup>1</sup>H NMR (500Mz, CDCl<sub>3</sub>) δ 8.12-8.10 (m, 2H), 7.83 (t, *J* = 8.0 Hz, 1H), 7.71 (dd, *J* = 1.0, 8.0 Hz, 1H), 7.53-7.48 (m, 3H), 7.44-7.41 (m, 1H), 7.38 (dd, *J* = 1.0, 8.0 Hz, 1H), 7.35-7.30 (m, 3H), 2.52 (s, 3H). <sup>13</sup>C NMR (125 Mz, CDCl<sub>3</sub>) δ 159.7, 156.5, 140.6, 139.5, 136.9, 136.1, 130.9, 129.8, 128.9, 128.6, 128.2, 127.0, 125.8, 122.3, 118.1, 20.7.

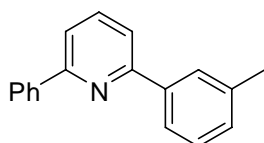

2-Phenyl-6-*m*-tolylpyridine (**3ad**): White solid, mp 66-67 °C. IR (KBr, cm<sup>-1</sup>) 3042, 2961, 2365, 1567, 1451, 821, 795, 761, 697. <sup>1</sup>H NMR (500Mz, CDCl<sub>3</sub>) δ 8.21-8.19

<sup>1</sup> Moreno-Manas, M.; Pleixats, R.; Serra-Muns, A. *Synlett*. **2006**, 3001.

<sup>2</sup> Wang, Y.; Toh, K.; Ng, E.; Chiba, S. *J. Am. Chem. Soc.* **2011**, *133*, 6411.

<sup>3</sup> Wei, Y.; Yoshikai, N. *J. Am. Chem. Soc.* **2013**, *135*, 3756.

(m, 2H), 8.03 (s, 1H), 7.97 (d,  $J = 8.0$  Hz, 1H), 7.81 (t,  $J = 8.0$  Hz, 1H), 7.71-7.69 (m, 2H), 7.56-7.53 (m, 2H), 7.49-7.41 (m, 2H), 7.29 (d,  $J = 7.5$  Hz, 1H), 2.51 (s, 3H).  $^{13}\text{C}$  NMR (125 Mz,  $\text{CDCl}_3$ )  $\delta$  157.0, 156.8, 139.5, 139.4, 138.2, 137.3, 129.7, 128.9, 128.6, 128.5, 127.7, 127.0, 124.1, 118.7, 118.5, 21.6. HRMS (ESI)  $m/z$  calcd for  $\text{C}_{18}\text{H}_{15}\text{N}$  ( $\text{M}+\text{H}$ ) $^+$  246.1277, Found 246.1281.

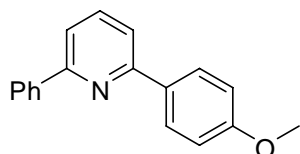

2-(4-Methoxyphenyl)-6-phenylpyridine (**3ae/3ca**): White solid, mp 132-133 °C (lit.<sup>4</sup> 133 °C).  $^1\text{H}$  NMR (500Mz,  $\text{CDCl}_3$ )  $\delta$  8.17-8.11 (m, 4H), 7.78 (t,  $J = 8.0$  Hz, 1H), 7.64 (dd,  $J = 3.0, 8.0$  Hz, 2H), 7.52-7.49 (m, 2H), 7.45-7.42 (m, 1H), 7.05-7.02 (m, 2H), 3.88 (s, 3H).  $^{13}\text{C}$  NMR (125 Mz,  $\text{CDCl}_3$ )  $\delta$  160.5, 156.6, 156.4, 139.6, 137.4, 132.1, 128.8, 128.6, 128.2, 126.9, 117.9, 117.8, 114.0, 55.3.

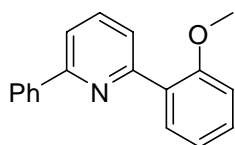

2-(2-methoxyphenyl)-6-phenylpyridine (**3af**): Oil<sup>5</sup>.  $^1\text{H}$  NMR (500Mz,  $\text{CDCl}_3$ )  $\delta$  8.14-8.12 (m, 2H), 8.04 (dd,  $J = 1.5, 7.5$  Hz, 1H), 7.86-7.85 (m, 1H), 7.78 (t,  $J = 7.5$  Hz, 1H), 7.67 (d,  $J = 7.5$  Hz, 1H), 7.51-7.48 (m, 2H), 7.44-7.39 (m, 2H), 7.16-7.13 (m, 1H), 7.03 (d,  $J = 8.0$  Hz, 1H), 3.90 (s, 3H).  $^{13}\text{C}$  NMR (125 Mz,  $\text{CDCl}_3$ )  $\delta$  157.2, 156.7, 155.5, 139.7, 136.3, 131.5, 129.9, 129.3, 128.7, 128.6, 127.0, 123.5, 121.1, 118.2, 111.5, 55.6.

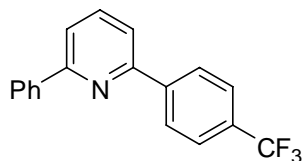

2-Phenyl-6-(4-(trifluoromethyl)phenyl)pyridine (**3ag**): White solid, mp 117-118 °C. IR (KBr,  $\text{cm}^{-1}$ ) 3041, 2352, 1580, 1460, 1334, 1062, 866, 814, 745, 897.  $^1\text{H}$  NMR (500Mz,  $\text{CDCl}_3$ )  $\delta$  8.26 (d,  $J = 8.0$  Hz, 2H), 8.15 (d,  $J = 8.0$  Hz, 2H), 7.85 (t,  $J = 8.0$  Hz, 1H), 7.76-7.71 (m, 4H), 7.52 (t,  $J = 7.5$  Hz, 2H), 7.46 (t,  $J = 7.5$  Hz, 1H).  $^{13}\text{C}$  NMR (125 Mz,  $\text{CDCl}_3$ )  $\delta$  157.1, 155.2, 142.8, 139.1, 137.7, 130.7 (q,  $^2J_{\text{C-F}} = 32.5$  Hz), 129.2, 128.7, 127.2, 127.0, 125.6 (q,  $^3J_{\text{C-F}} = 3.8$  Hz), 124.2 (q,  $^1J_{\text{C-F}} = 270.0$  Hz), 119.4, 118.9. HRMS (ESI)  $m/z$  calcd for  $\text{C}_{18}\text{H}_{12}\text{NF}_3$  ( $\text{M}+\text{H}$ ) $^+$  300.0995, Found 300.1005.

<sup>4</sup> Boivin, J.; Carpentier, F.; Jrad, R. *Synthesis*. **2006**, 1664.

<sup>5</sup> Wang, Y.; Toh, K.; Ng, E.; Chiba, S. *J. Am. Chem. Soc.* **2011**, *133*, 6411

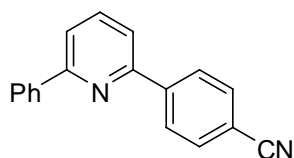

4-(6-Phenylpyridine-2-yl)-benzonitrile (**3ah**): White solid, mp 101-102 °C (lit.<sup>6</sup> not reported). <sup>1</sup>H NMR (500Mz, CDCl<sub>3</sub>) δ 8.26 (d, *J* = 8.5 Hz, 2H), 8.14-8.13 (m, 2H), 7.87 (t, *J* = 8.0 Hz, 1H), 7.78-7.76 (m, 3H), 7.71 (d, *J* = 7.5 Hz, 1H), 7.53-7.50 (m, 2H), 7.47-7.45 (m, 1H). <sup>13</sup>C NMR (125 Mz, CDCl<sub>3</sub>) δ 157.3, 154.5, 143.5, 138.9, 137.8, 132.5, 129.3, 128.8, 127.4, 126.9, 119.8, 119.0, 118.9, 112.4.

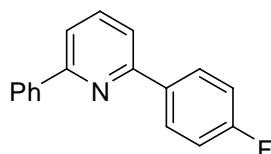

2-(4-Fluorophenyl)-6-phenylpyridine (**3ai/3da**): White solid, mp 94-95 °C (lit.<sup>7</sup> not reported). <sup>1</sup>H NMR (500 Mz, CDCl<sub>3</sub>) δ 8.19-8.15 (m, 4H), 7.78 (t, *J* = 8.0 Hz, 1H), 7.68 (d, *J* = 8.0 Hz, 1H), 7.63 (d, *J* = 8.0 Hz, 1H), 7.54 (t, *J* = 7.0 Hz, 2H), 7.47 (t, *J* = 7.0 Hz, 1H), 7.21 (t, *J* = 8.0 Hz, 2H). <sup>13</sup>C NMR (125 Mz, CDCl<sub>3</sub>) δ 163.5 (d, <sup>1</sup>*J*<sub>C-F</sub> = 247.5 Hz), 156.8, 156.7, 139.3, 137.5, 135.6 (d, <sup>4</sup>*J*<sub>C-F</sub> = 3.7 Hz), 129.0, 128.7 (d, <sup>3</sup>*J*<sub>C-F</sub> = 8.7 Hz), 128.6, 126.9, 118.5, 118.2, 115.5 (d, <sup>2</sup>*J*<sub>C-F</sub> = 21.3 Hz).

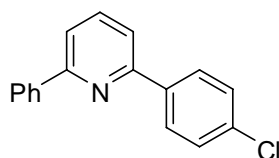

2-(4-Chlorophenyl)-6-phenylpyridine (**3aj**): White solid, mp 104-105 °C. IR (KBr, cm<sup>-1</sup>) 3051, 2365, 1583, 1444, 1009, 809, 760, 695. <sup>1</sup>H NMR (500 Mz, CDCl<sub>3</sub>) δ 8.15 (d, *J* = 7.0Hz, 2H), 8.11 (d, *J* = 7.5Hz, 2H), 7.80 (t, *J* = 7.5 Hz, 1H), 7.70 (d, *J* = 7.5Hz, 1H), 7.65 (d, *J* = 7.5 Hz, 1H), 7.52 (t, *J* = 7.0 Hz, 2H), 7.48-7.44 (m, 3H). <sup>13</sup>C NMR (125 Mz, CDCl<sub>3</sub>) δ 156.9, 155.5, 139.3, 137.9, 137.6, 135.0, 129.1, 128.8, 128.7, 128.2, 126.9, 118.8, 118.3. HRMS (ESI) *m/z* calcd for C<sub>17</sub>H<sub>12</sub>NCl [M + H]<sup>+</sup> 266.0731, found 266.0741.

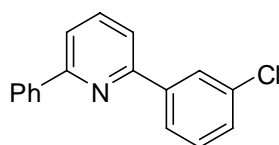

<sup>6</sup> Kumar, A.; Rhodes, R. A.; Spsychala, J.; Wilson, W. D.; Boykin, D. W.; Tidwell, R. R.; Dykstra, C. C.; Hall, J. E.; Jones, S. K.; Schinazi, R. F. *Eur. J. Med. Chem.* **1995**, *30*, 99.

<sup>7</sup> Andersson, H.; Sainte-Luce, B.; Das, S.; Olsson, R.; Almqvist, F. *Chem. Commun.* **2010**, *46*, 3384.

2-(3-Chlorophenyl)-6-phenylpyridine (**3ak**): White solid, mp 49-50 °C. IR (KBr,  $\text{cm}^{-1}$ ) 3045, 2372, 1563, 1441, 1007, 821, 783, 760, 690.  $^1\text{H}$  NMR (500Mz,  $\text{CDCl}_3$ )  $\delta$  8.20 (d,  $J = 2.0$  Hz, 1H), 8.17-8.15 (m, 2H), 8.03-8.01 (m, 1H), 7.81 (t,  $J = 8.0$  Hz, 1H), 7.72 (dd,  $J = 0.5, 8.0$  Hz, 1H), 7.66 (d,  $J = 8.0$  Hz, 1H), 7.54-7.51 (m, 2H), 7.48-7.45 (m, 1H), 7.43-7.41 (m, 2H).  $^{13}\text{C}$  NMR (125 Mz,  $\text{CDCl}_3$ )  $\delta$  157.0, 155.3, 141.3, 139.2, 137.6, 134.8, 129.9, 129.1, 128.9, 128.7, 127.1, 127.0, 125.0, 119.1, 118.6. HRMS (ESI)  $m/z$  calcd for  $\text{C}_{17}\text{H}_{12}\text{NCl}$  ( $\text{M}+\text{H}$ ) $^+$  266.0731, Found 266.0740.

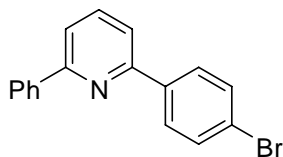

2-(4-Bromophenyl)-6-phenylpyridine (**3al**): White solid, mp 115-116 °C (lit.<sup>8</sup> not reported).  $^1\text{H}$  NMR (500Mz,  $\text{CDCl}_3$ )  $\delta$  8.14 (d,  $J = 8.0$  Hz, 2H), 8.04 (d,  $J = 8.5$  Hz, 2H), 7.80 (t,  $J = 7.5$  Hz, 1H), 7.71 (d,  $J = 7.5$  Hz, 1H), 7.66-7.62 (m, 3H), 7.52 (t,  $J = 7.5$  Hz, 2H), 7.45 (t,  $J = 7.5$  Hz, 1H).  $^{13}\text{C}$  NMR (125 Mz,  $\text{CDCl}_3$ )  $\delta$  157.0, 155.6, 139.2, 138.3, 137.6, 131.8, 129.1, 128.7, 128.5, 126.9, 123.4, 118.9, 118.3.

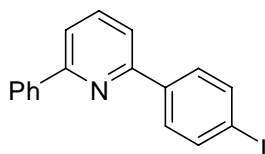

2-(4-Iodophenyl)-6-phenylpyridine (**3am**): White solid, mp 139-141 °C. IR (KBr,  $\text{cm}^{-1}$ ) 3027, 2352, 1586, 1441, 1003, 803, 761, 692.  $^1\text{H}$  NMR (500Mz,  $\text{CDCl}_3$ )  $\delta$  8.13 (d,  $J = 7.5$  Hz, 2H), 7.90 (d,  $J = 8.0$  Hz, 2H), 7.84-7.79 (m, 3H), 7.71 (d,  $J = 8.0$  Hz, 1H), 7.65 (d,  $J = 8.0$  Hz, 1H), 7.51 (t,  $J = 7.5$  Hz, 2H), 7.44 (t,  $J = 7.0$  Hz, 1H).  $^{13}\text{C}$  NMR (125 Mz,  $\text{CDCl}_3$ )  $\delta$  157.0, 155.7, 139.2, 138.9, 137.8, 137.6, 129.1, 128.7, 128.6, 126.9, 119.0, 118.3, 95.3. HRMS (ESI)  $m/z$  calcd for  $\text{C}_{17}\text{H}_{12}\text{NI}$  ( $\text{M}+\text{H}$ ) $^+$  358.0087, Found 358.0083.

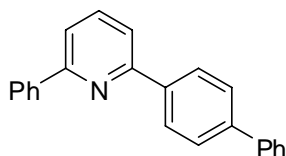

2-(Biphenyl-4-yl)-6-phenylpyridine (**3an**): White solid, mp 149-150 °C (lit.<sup>9</sup> 147-148 °C).  $^1\text{H}$  NMR (500Mz,  $\text{CDCl}_3$ )  $\delta$  8.26 (d,  $J = 8.5$  Hz, 2H), 8.21-8.19 (m, 2H), 7.83 (t,  $J = 7.5$  Hz, 1H), 7.76-7.69 (m, 6H), 7.55-7.44 (m, 5H), 7.39 (t,  $J = 7.0$  Hz, 1H).  $^{13}\text{C}$

<sup>8</sup> Wang, Y.; Toh, K.; Ng, E.; Chiba, S. *J. Am. Chem. Soc.* **2011**, *133*, 6411.

<sup>9</sup> Gilman, H.; Weipert, E.; Soddy, T.; Hayes, F. *J. Org. Chem.* **1957**, *22*, 1169.

NMR (125 Mz, CDCl<sub>3</sub>) δ 156.9, 156.4, 141.7, 140.7, 139.5, 138.4, 137.5, 129.0, 128.8, 128.7, 127.5, 127.4, 127.3, 127.1, 127.0, 118.6, 118.5.

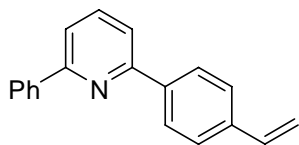

2-Phenyl-6-(4-vinylphenyl)pyridine (**3ao**): White solid, mp 101-102 °C. IR (KBr, cm<sup>-1</sup>) 3052, 2346, 1639, 1537, 1507, 1407, 906, 814, 765, 750, 697. <sup>1</sup>H NMR (500Mz, CDCl<sub>3</sub>) δ 8.20-8.16 (m, 4H), 7.80 (t, *J* = 7.5 Hz, 1H), 7.69 (d, *J* = 7.5 Hz, 2H), 7.57-7.52 (m, 4H), 7.48-7.45 (m, 1H), 6.82 (dd, *J* = 11.0, 17.5 Hz, 1H), 5.87 (d, *J* = 17.5 Hz, 1H), 5.34 (d, *J* = 11.0 Hz, 1H). <sup>13</sup>C NMR (125 Mz, CDCl<sub>3</sub>) δ 156.8, 156.3, 139.5, 138.8, 138.2, 137.4, 136.5, 128.9, 128.6, 127.1, 126.9, 126.5, 118.6, 118.4, 114.3. HRMS (ESI) *m/z* calcd for C<sub>19</sub>H<sub>15</sub>N (M+H)<sup>+</sup> 258.1277, Found 258.1264.

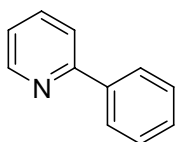

2-Phenylpyridine (**3ea**)<sup>10</sup>: Oil. <sup>1</sup>H NMR (500 MHz, CDCl<sub>3</sub>) δ 8.70 (d, *J* = 4.5 Hz, 1H), 8.01-7.99 (m, 2H), 7.76-7.72 (m, 2H), 7.50-7.47 (m, 2H), 7.44-7.40 (m, 1H), 7.24-7.21 (m, 1H). <sup>13</sup>C NMR (125 Mz, CDCl<sub>3</sub>) δ 157.4, 149.6, 139.4, 136.7, 128.9, 128.7, 126.9, 122.0, 120.5.

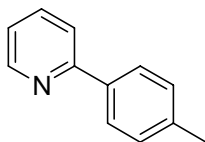

2-*p*-Tolylpyridine (**3eb**)<sup>11</sup>: Oil. <sup>1</sup>H NMR (500 MHz, CDCl<sub>3</sub>) δ 8.69-8.67 (m, 1H), 7.90 (d, *J* = 8.0 Hz, 2H), 7.74-7.69(m, 2H), 7.28 (d, *J* = 8.0 Hz, 2H), 7.21-7.18 (m, 1H), 2.41 (s, 3H). <sup>13</sup>C NMR (125 Mz, CDCl<sub>3</sub>) δ 157.5, 149.6, 138.9, 136.6, 136.5, 129.4, 126.8, 121.7, 120.2, 21.2.

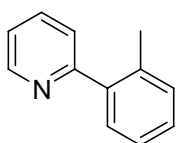

<sup>10</sup> Prokopcova, H.; Kappe, C. *J. Org. Chem.* **2007**, *72*, 4440.

<sup>11</sup> Yu, D.; Yu, M.; Guan, B.; Li, B.; Zheng, Y.; Wu, Z.; Shi, Z. *Org. Lett.* **2009**, *11*, 3374.

2-*o*-Tolylpyridine (**3ec**)<sup>12</sup>: Oil. <sup>1</sup>H NMR (500 MHz, CDCl<sub>3</sub>) δ 8.67 (d, *J* = 4.5 Hz, 1H), 7.73-7.70 (m, 1H), 7.37 (d, *J* = 8.0 Hz, 2H), 7.28-7.20 (m, 4H), 2.34 (s, 3H). <sup>13</sup>C NMR (125 Mz, CDCl<sub>3</sub>) δ 160.0, 149.2, 140.4, 136.1, 135.7, 130.7, 129.6, 128.2, 125.8, 124.0, 121.6, 20.2.

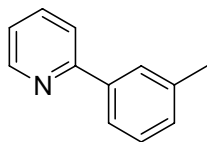

2-*m*-Tolylpyridine (**3ed**)<sup>13</sup>: Oil. <sup>1</sup>H NMR (500 MHz, CDCl<sub>3</sub>) δ 8.70 (d, *J* = 4.5 Hz, 1H), 7.83 (s, 1H), 7.76-7.70 (m, 3H), 7.37 (t, *J* = 7.5 Hz, 1H), 7.24-7.21 (m, 2H), 2.44 (s, 3H). <sup>13</sup>C NMR (125 Mz, CDCl<sub>3</sub>) δ 157.6, 149.5, 139.2, 138.3, 136.7, 129.7, 128.6, 127.7, 124.0, 122.0, 120.7, 21.4.

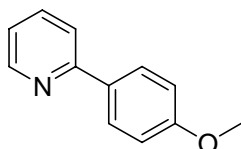

2-(4-Methoxyphenyl)pyridine (**3ee**): White solid, mp 53-54 °C (lit.<sup>14</sup> 53-55 °C). <sup>1</sup>H NMR (500 MHz, CDCl<sub>3</sub>) δ 8.65 (d, *J* = 5.0 Hz, 1H), 7.97-7.94 (m, 2H), 7.70-7.64 (m, 2H), 7.16-7.14 (m, 1H), 7.01-6.98 (m, 2H), 3.85 (s, 3H). <sup>13</sup>C NMR (125 Mz, CDCl<sub>3</sub>) δ 160.4, 157.1, 149.5, 136.6, 132.0, 128.1, 121.3, 119.7, 114.1, 55.3.

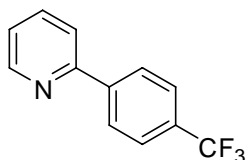

2-(4-(Trifluoromethyl)phenyl)pyridine (**3eg**): White solid, mp 73-74 °C. (lit.<sup>15</sup> 70-72 °C). <sup>1</sup>H NMR (500 MHz, CDCl<sub>3</sub>) δ 8.73-8.72 (m, 1H), 8.11 (d, *J* = 8.0 Hz, 2H), 7.81-7.78 (m, 1H), 7.77-7.75 (m, 1H), 7.73 (d, *J* = 8.0 Hz, 2H), 7.31-7.28 (m, 1H). <sup>13</sup>C NMR (125 Mz, CDCl<sub>3</sub>) δ 155.9, 149.9, 142.7, 137.0, 130.7 (q, <sup>2</sup>*J*<sub>C-F</sub> = 32.5 Hz), 127.2, 125.7 (q, <sup>3</sup>*J*<sub>C-F</sub> = 3.8 Hz), 124.2 (q, <sup>1</sup>*J*<sub>C-F</sub> = 270.0 Hz), 122.9, 120.8.

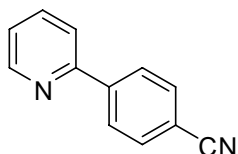

<sup>12</sup> Chen, X.; Li, J.; Hao, X.; Goodhue, C.; Yu, J. *J. Am. Chem. Soc.* **2006**, *128*, 78.

<sup>13</sup> Liu, C.; Yang, W. *Chem Commun.* **2009**, *45*, 6267.

<sup>14</sup> Ackermann, L.; Kapdi, A.; Fenner, S.; Korhaass, C.; Schulzke, C. *Chem. Eur. J.* **2011**, *17*, 2965.

<sup>15</sup> Ackermann, L.; Potukuchi, H.; Kapdi, A.; Schulzke, C. *Chem. Eur. J.* **2010**, *16*, 3303.

4-(Pyridine-2-yl)benzonitrile (**3eh**): White solid, mp 92-93 °C (lit.<sup>16</sup> 91-92 °C). <sup>1</sup>H NMR (500 MHz, CDCl<sub>3</sub>) δ 8.73-8.72 (m, 1H), 8.11 (dd, *J* = 2.0, 7.0 Hz, 2H), 7.82-7.79 (m, 1H), 7.77-7.74 (m, 3H), 7.32-7.30 (m, 1H). <sup>13</sup>C NMR (125 Mz, CDCl<sub>3</sub>) δ 155.2, 150.0, 143.5, 137.0, 132.5, 127.4, 123.3, 120.9, 118.8, 112.4.

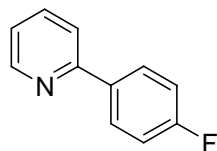

2-(4-Fluorophenyl)pyridine (**3ei**): White solid, mp 40-41 °C (lit.<sup>17</sup> 39-41 °C). <sup>1</sup>H NMR (500 MHz, CDCl<sub>3</sub>) δ 8.67 (d, *J* = 5.0 Hz, 1H), 7.99-7.96 (m, 2H), 7.76-7.73 (m, 1H), 7.68 (d, *J* = 8.0 Hz, 1H), 7.23 (dd, *J* = 5.0, 7.0 Hz, 1H), 7.16(t, *J* = 9.0 Hz, 2H). <sup>13</sup>C NMR (125Mz, CDCl<sub>3</sub>) δ 163.5 (d, <sup>1</sup>*J*<sub>C-F</sub> = 247.0 Hz), 156.4, 149.6, 136.8, 135.5, 128.7 (d, <sup>3</sup>*J*<sub>C-F</sub> = 8.1 Hz), 122.0, 120.2, 115.6 (d, <sup>2</sup>*J*<sub>C-F</sub> = 21.5 Hz).

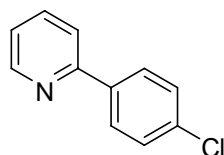

2-(4-Chlorophenyl)pyridine (**3ej**): White solid, mp 51-52 °C (lit.<sup>18</sup> 51-52 °C). <sup>1</sup>H NMR (500 MHz, CDCl<sub>3</sub>) δ 8.68 (d, *J* = 4.0 Hz, 1H), 7.95-7.93 (m, 2H), 7.77-7.74 (m, 1H), 7.70 (d, *J* = 7.5 Hz, 1H), 7.46-7.43 (m, 2H), 7.26-7.23 (m, 1H). <sup>13</sup>C NMR (125 Mz, CDCl<sub>3</sub>) δ 156.2, 149.7, 137.8, 136.8, 135.1, 128.9, 128.2, 122.3, 120.3.

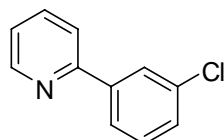

2-(3-Chlorophenyl)pyridine (**3ek**)<sup>19</sup>: Oil. <sup>1</sup>H NMR (500 MHz, CDCl<sub>3</sub>) δ 8.70 (d, *J* = 4.5 Hz, 1H), 8.01 (d, *J* = 1.5 Hz, 1H), 7.87-7.85 (m, 1H), 7.79-7.75 (m, 1H), 7.71 (d, *J* = 8.0 Hz, 1H), 7.42-7.38 (m, 2H), 7.28-7.25 (m, 1H). <sup>13</sup>C NMR (125 Mz, CDCl<sub>3</sub>) δ 156.0, 149.8, 141.2, 136.9, 134.9, 130.0, 128.9, 127.1, 124.9, 124.6, 120.6.

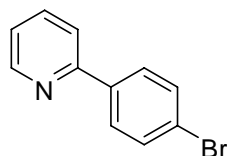

<sup>16</sup> Billingsley, K.; Buchwald, S. *Angew. Chem. Int. Ed.* **2008**, *47*, 4695.

<sup>17</sup> Ackermann, L.; Potukuchi, H.; Kapdi, A.; Schulzke, C. *Chem. Eur. J.* **2010**, *16*, 3303.

<sup>18</sup> Beadle, J.; Korzeniowski, S.; Rosenberg, D.; Garcia-Slanga, B.; Gokel, G. *J. Org. Chem.* **1984**, *49*, 1594.

<sup>19</sup> Chaitanya, M.; Yadagiri, D.; Anbarasan, P. *Org. Lett.* **2013**, *15*, 4960.

2-(4-Bromophenyl)pyridine (**3el**): White solid, mp 60-61 °C (lit.<sup>20</sup> 60-62 °C). <sup>1</sup>H NMR (500 MHz, CDCl<sub>3</sub>) δ 8.69 (d, *J* = 4.5 Hz, 1H), 7.89-7.86 (m, 2H), 7.77-7.74 (m, 1H), 7.70 (d, *J* = 8.0 Hz, 1H), 7.61-7.59 (m, 2H), 7.26-7.24 (m, 1H). <sup>13</sup>C NMR (125 Mz, CDCl<sub>3</sub>) δ 156.3, 149.8, 138.3, 136.9, 131.9, 128.5, 123.4, 122.4, 120.3.

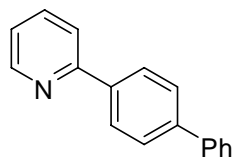

2-(Biphenyl-4-yl)pyridine (**3en**): White solid, mp 138-139 °C (lit.<sup>21</sup> 139-142 °C). <sup>1</sup>H NMR (500 MHz, CDCl<sub>3</sub>) δ 8.73-8.72 (m, 1H), 8.10-8.08 (m, 2H), 7.79-7.76 (m, 2H), 7.75-7.72 (m, 2H), 7.68-7.66 (m, 2H), 7.49-7.46 (m, 2H), 7.40-7.36 (m, 1H), 7.26-7.23 (m, 1H). <sup>13</sup>C NMR (125 Mz, CDCl<sub>3</sub>) δ 157.0, 149.7, 141.7, 140.6, 138.3, 136.7, 128.8, 127.5, 127.4, 127.3, 127.1, 122.1, 120.4.

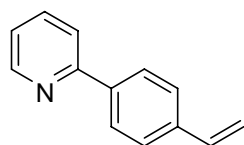

2-(4-Vinylphenyl)pyridine (**3eo**)<sup>22</sup>: Oil. <sup>1</sup>H NMR (500 MHz, CDCl<sub>3</sub>) δ 8.70-8.68 (m, 1H), 7.99-7.97 (m, 2H), 7.72-7.71 (m, 2H), 7.51 (d, *J* = 8.5 Hz, 2H), 7.26-7.19 (m, 1H), 6.77 (dd, *J* = 11.0, 17.5 Hz, 1H), 5.83 (d, *J* = 17.5 Hz, 1H), 5.30 (d, *J* = 11.0 Hz, 1H). <sup>13</sup>C NMR (125 Mz, CDCl<sub>3</sub>) δ 156.9, 149.6, 138.7, 138.1, 136.6, 136.4, 127.0, 126.6, 122.0, 120.3, 114.4.

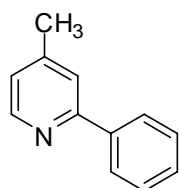

4-Methyl-2-phenylpyridine (**3fa**)<sup>23</sup>: Oil. <sup>1</sup>H NMR (500Mz, CDCl<sub>3</sub>) δ 8.55 (d, *J* = 5.0 Hz, 1H), 7.99-7.97 (m, 2H), 7.54 (d, *J* = 0.5 Hz, 1H), 7.48-7.45 (m, 2H), 7.42-7.39 (m, 1H), 7.05 (d, *J* = 5.0 Hz, 1H), 2.41 (s, 3H). <sup>13</sup>C NMR (125 Mz, CDCl<sub>3</sub>) δ 157.3, 149.4, 147.7, 139.5, 128.7, 128.6, 126.9, 123.1, 121.5, 21.2.

<sup>20</sup> Ono, K.; Joho, M.; Satio, K.; Tomura, M.; Matsushita, Y.; Naka, S.; Okada, H.; Onnagawa, H. *Eur. J. Inorg. Chem.* **2006**, 3676.

<sup>21</sup> Kumar, M.; Park, K.; Lee, S. *Adv. Synth. Catal.* **2010**, 352, 3255.

<sup>22</sup> Mizuno, H.; Takaya, J.; Iwasawa, N. *J. Am. Chem. Soc.* **2011**, 133, 1251.

<sup>23</sup> Ohashi, M.; Takeda, I.; Ikawa, M.; Ogoshi, S. *J. Am. Chem. Soc.* **2011**, 133, 18018.



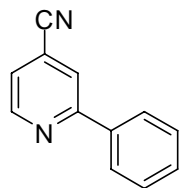

2-Phenylisonicotinonitrile (**3ga**): White solid, mp 76-77 °C (lit.<sup>24</sup> not reported). <sup>1</sup>H NMR (500 Mz, CDCl<sub>3</sub>) δ 8.85 (1H, d, *J* = 5.0 Hz), 8.01-7.99 (2H, m), 7.94 (1H, d, *J* = 0.5 Hz), 7.53-7.48 (3H, m), 7.45-7.43 (1H, m). <sup>13</sup>C NMR (125 Mz, CDCl<sub>3</sub>) δ 158.7, 150.6, 137.3, 130.2, 129.0, 126.9, 123.1, 122.0, 121.2, 116.7.

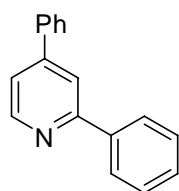

2,4-Diphenylpyridine (**3ha**): White solid, mp 67-68 °C (lit.<sup>25</sup> 80 °C). <sup>1</sup>H NMR (500Mz, CDCl<sub>3</sub>) δ 8.75 (d, *J* = 5.0 Hz, 1H), 8.08-8.07 (m, 2H), 7.94 (d, *J* = 1.0 Hz, 1H), 7.71-7.69 (m, 2H), 7.53-7.50 (m, 4H), 7.49-7.44 (m, 3H). <sup>13</sup>C NMR (125 Mz, CDCl<sub>3</sub>) δ 158.0, 150.0, 149.2, 139.4, 138.5, 129.1, 129.0, 128.9, 128.7, 127.0, 126.9, 120.2, 118.7.

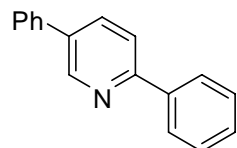

2,5-Diphenylpyridine (**3ia**): White solid, mp 171-172 °C (lit.<sup>26</sup> 170-172 °C). <sup>1</sup>H NMR (500 Mz, CDCl<sub>3</sub>) δ 8.95 (d, *J* = 2.0Hz, 1H), 8.07-8.05 (m, 2H), 7.96 (dd, *J* = 2.5, 8.0 Hz, 1H), 7.81 (d, *J* = 8.5Hz, 1H), 7.66-7.64 (m, 2H), 7.52-7.49 (m, 4H), 7.46-7.41 (m, 2H). <sup>13</sup>C NMR (125 Mz, CDCl<sub>3</sub>) δ 156.1, 148.1, 139.0, 137.6, 135.1, 134.9, 129.1, 129.0, 128.8, 128.0, 127.0, 126.8, 120.3.

<sup>24</sup> Wang, J.; Wang, S.; Wang, G.; Zhang, J.; Yu, X. *Chem. Commun.* **2012**, 48, 11769.

<sup>25</sup> Kleine, T.; Froehlich, R.; Wibbeling, B.; Wuerthwein, E. *J. Org. Chem.* **2011**, 76, 4591.

<sup>26</sup> Prokopcova, H.; Kappe, C. *J. Org. Chem.* **2007**, 72, 4440.

## 8. $^1\text{H}$ NMR and $^{13}\text{C}$ NMR spectra for all products

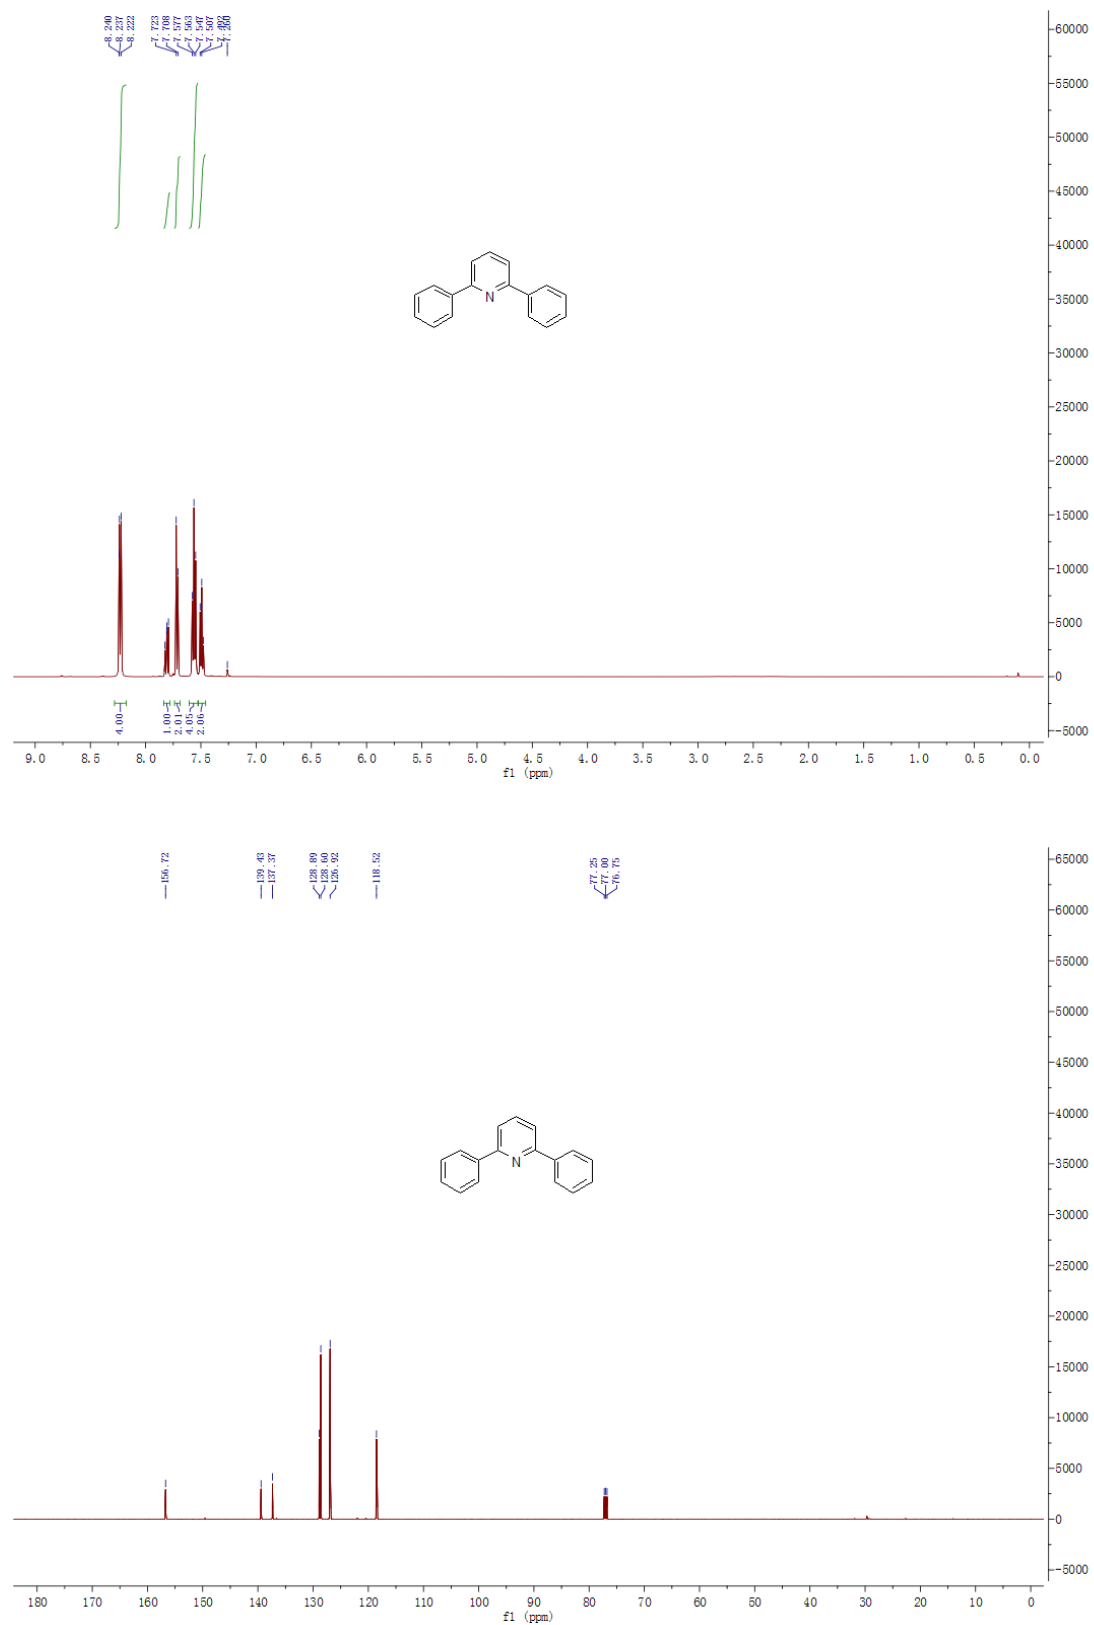

**Figure S1.**  $^1\text{H}$  NMR of **3aa** (500 MHz, CDCl<sub>3</sub>) and  $^{13}\text{C}$  NMR of **3aa** (125 MHz, CDCl<sub>3</sub>).

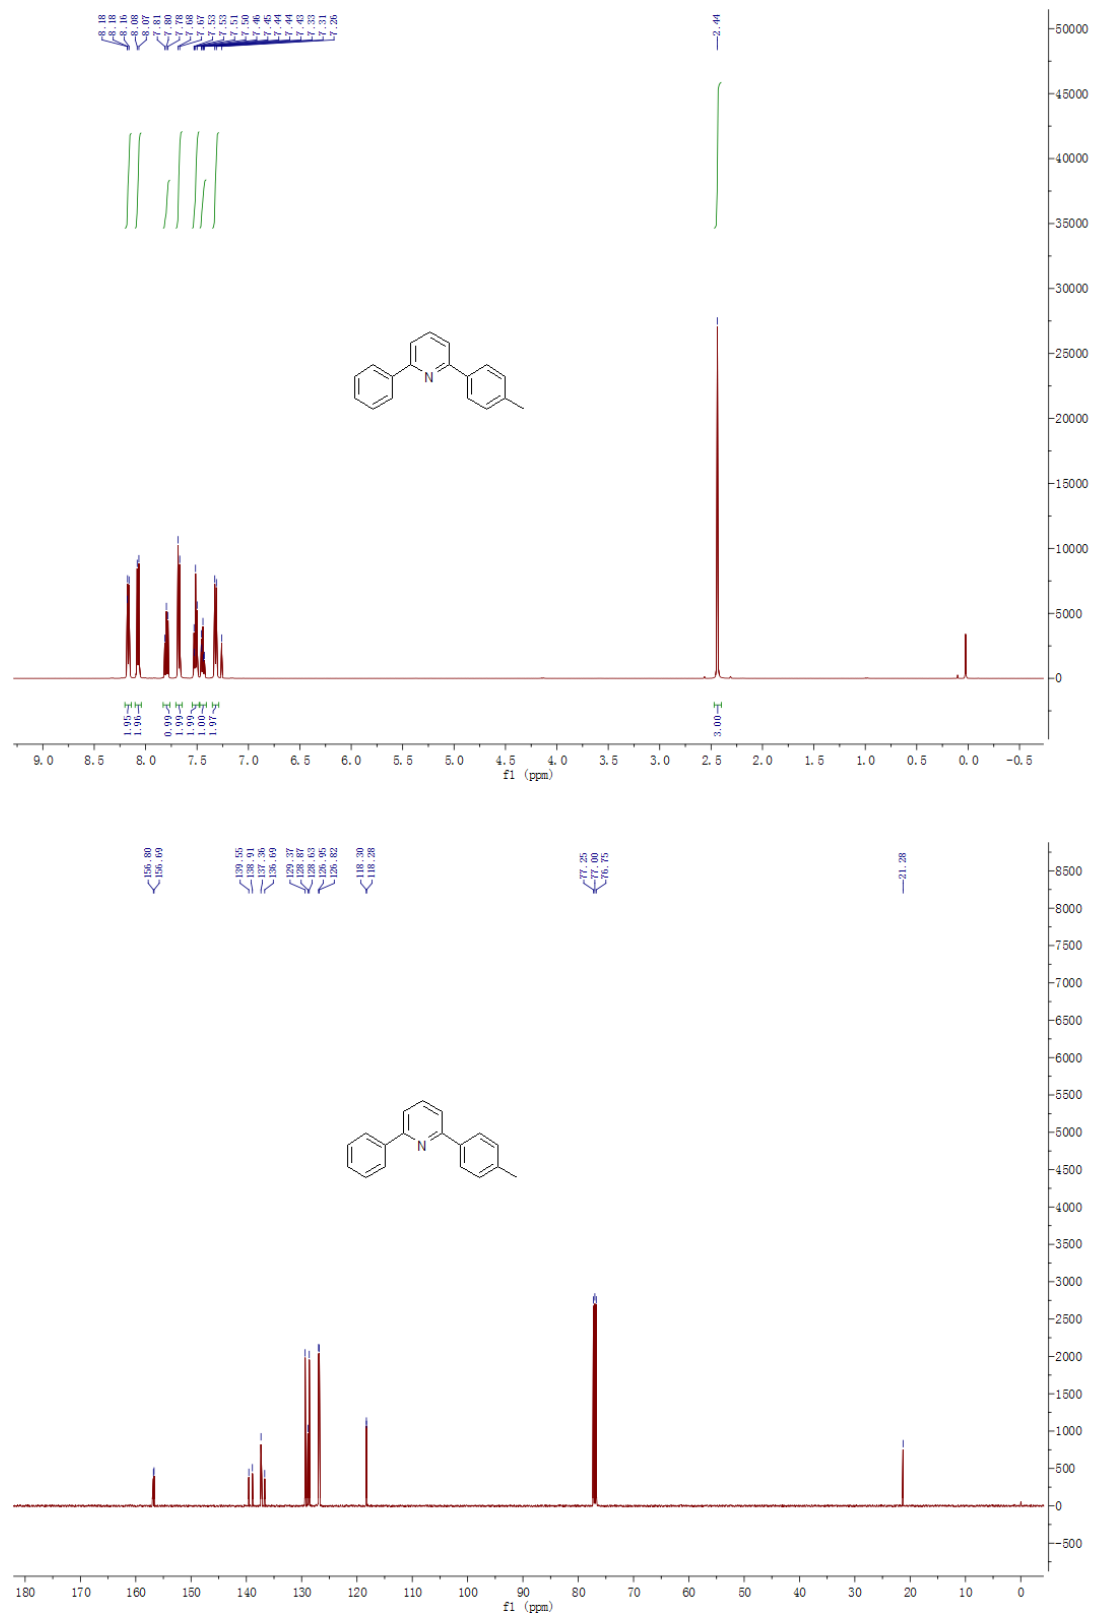

**Figure S2.**  $^1\text{H}$  NMR of **3ab** (500 MHz,  $\text{CDCl}_3$ ) and  $^{13}\text{C}$  NMR of **3ab** (125 MHz,  $\text{CDCl}_3$ ).

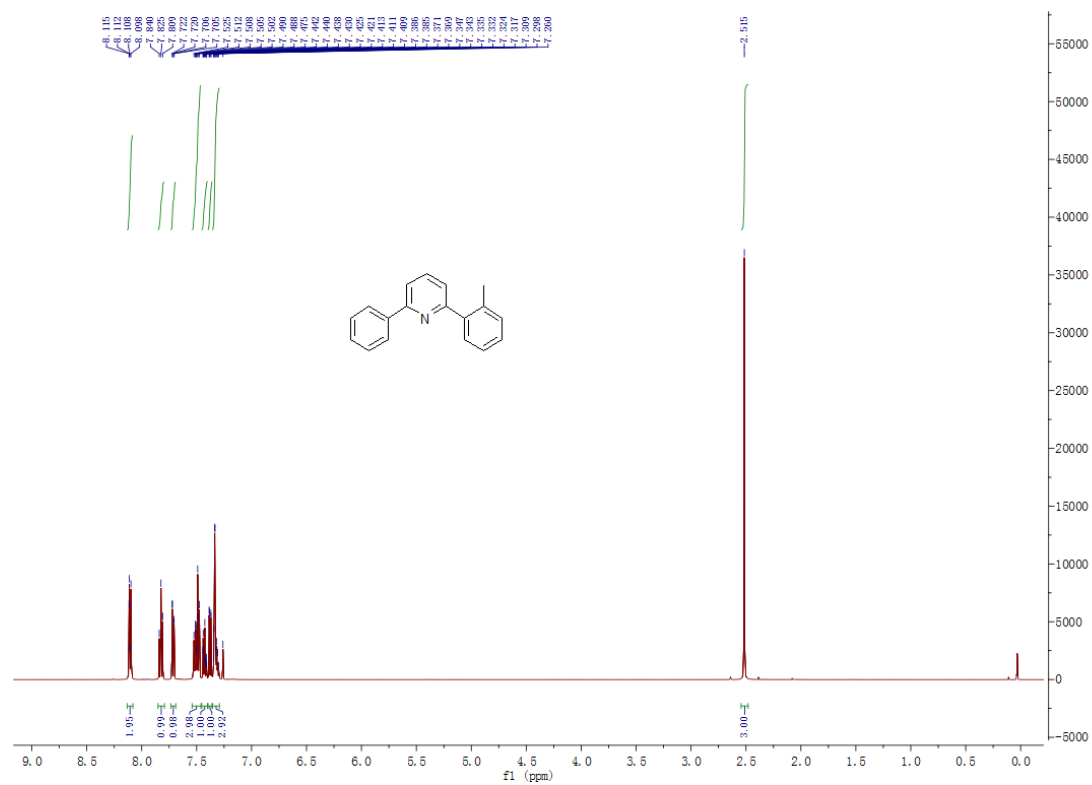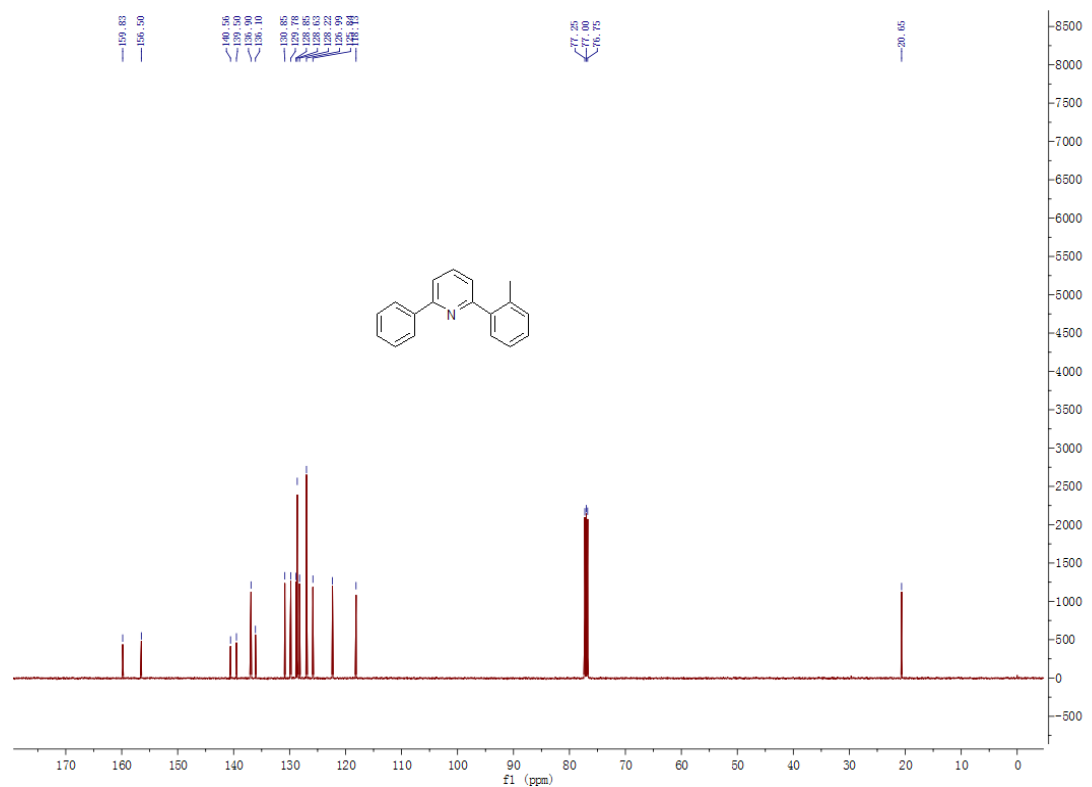

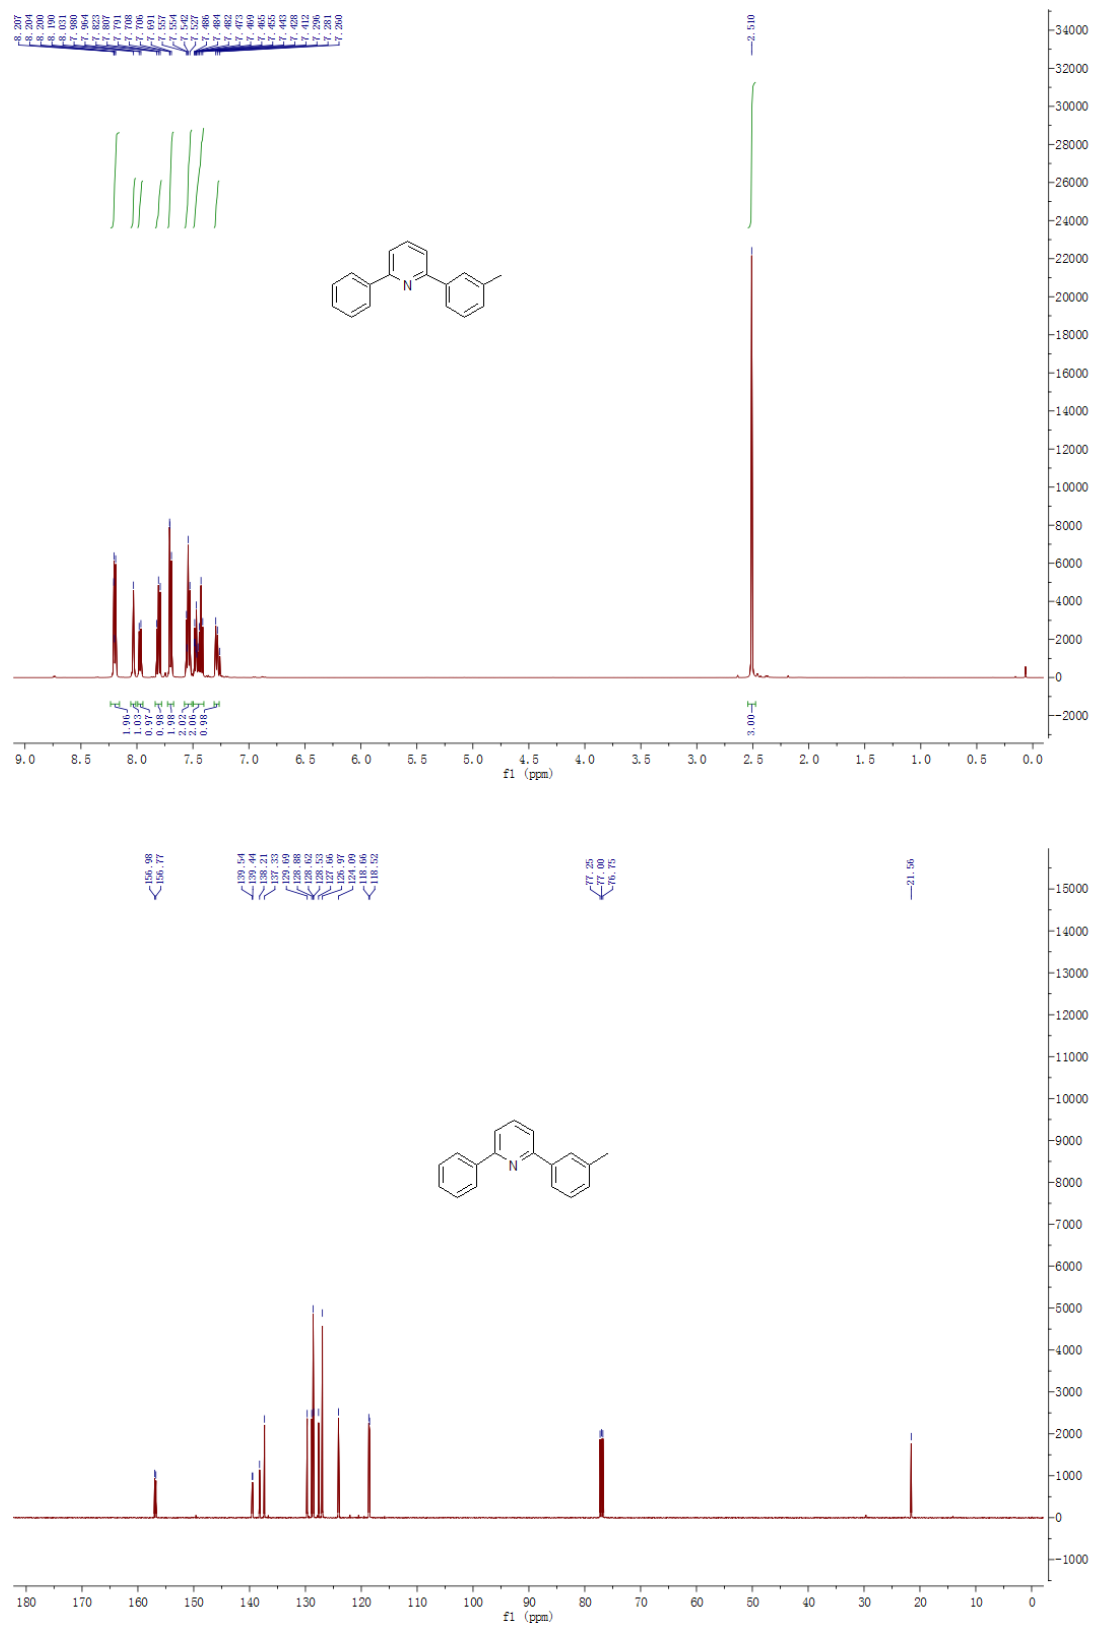

**Figure S4.**  $^1\text{H}$  NMR of **3ad** (500 MHz,  $\text{CDCl}_3$ ) and  $^{13}\text{C}$  NMR of **3ad** (125 MHz,  $\text{CDCl}_3$ ).

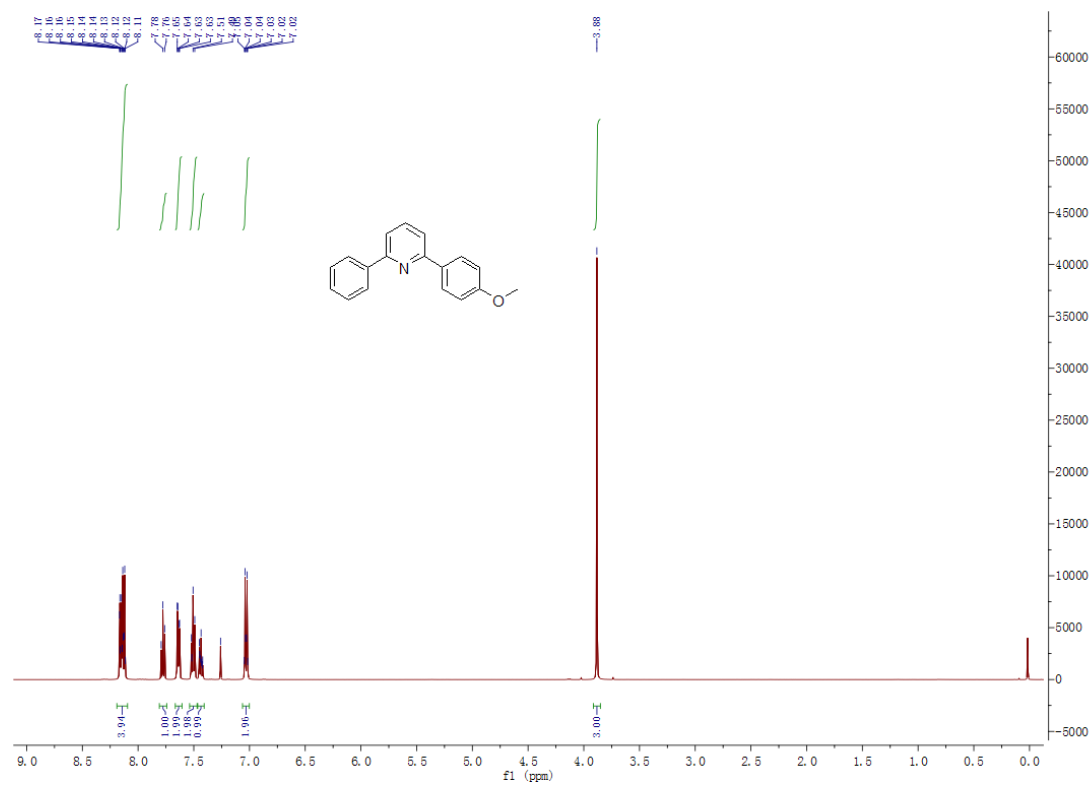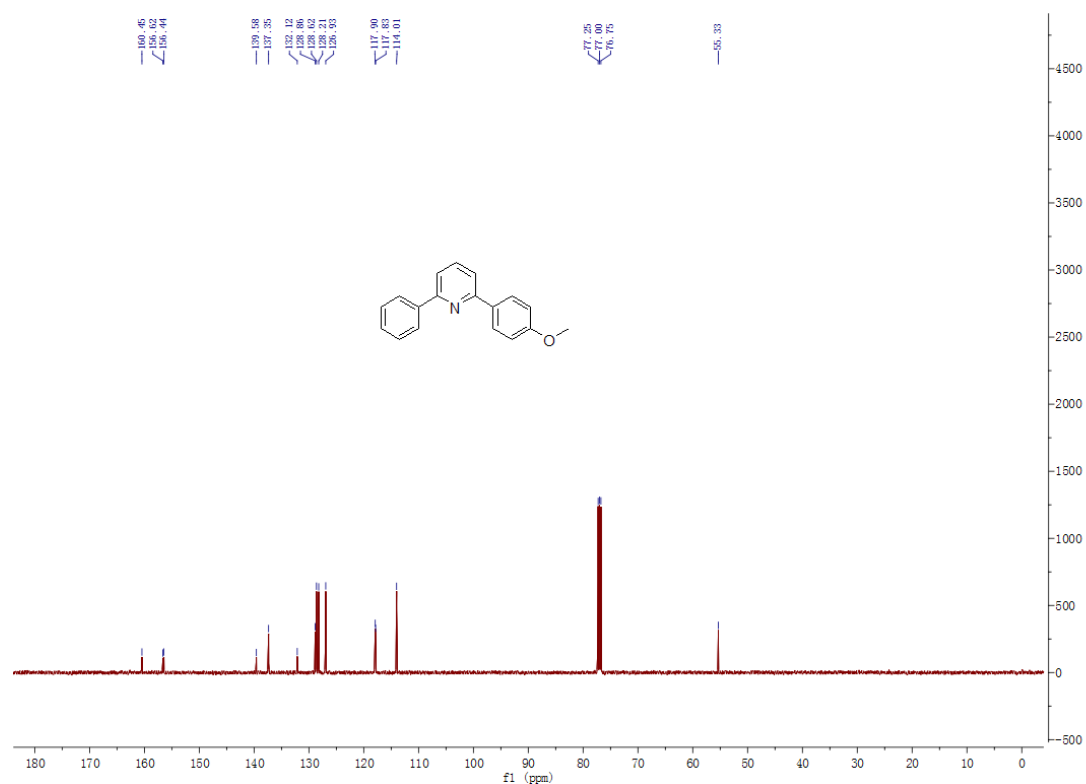

**Figure S5.**  $^1\text{H}$  NMR of **3ae** (500 MHz,  $\text{CDCl}_3$ ) and  $^{13}\text{C}$  NMR of **3ae** (125 MHz,  $\text{CDCl}_3$ ).

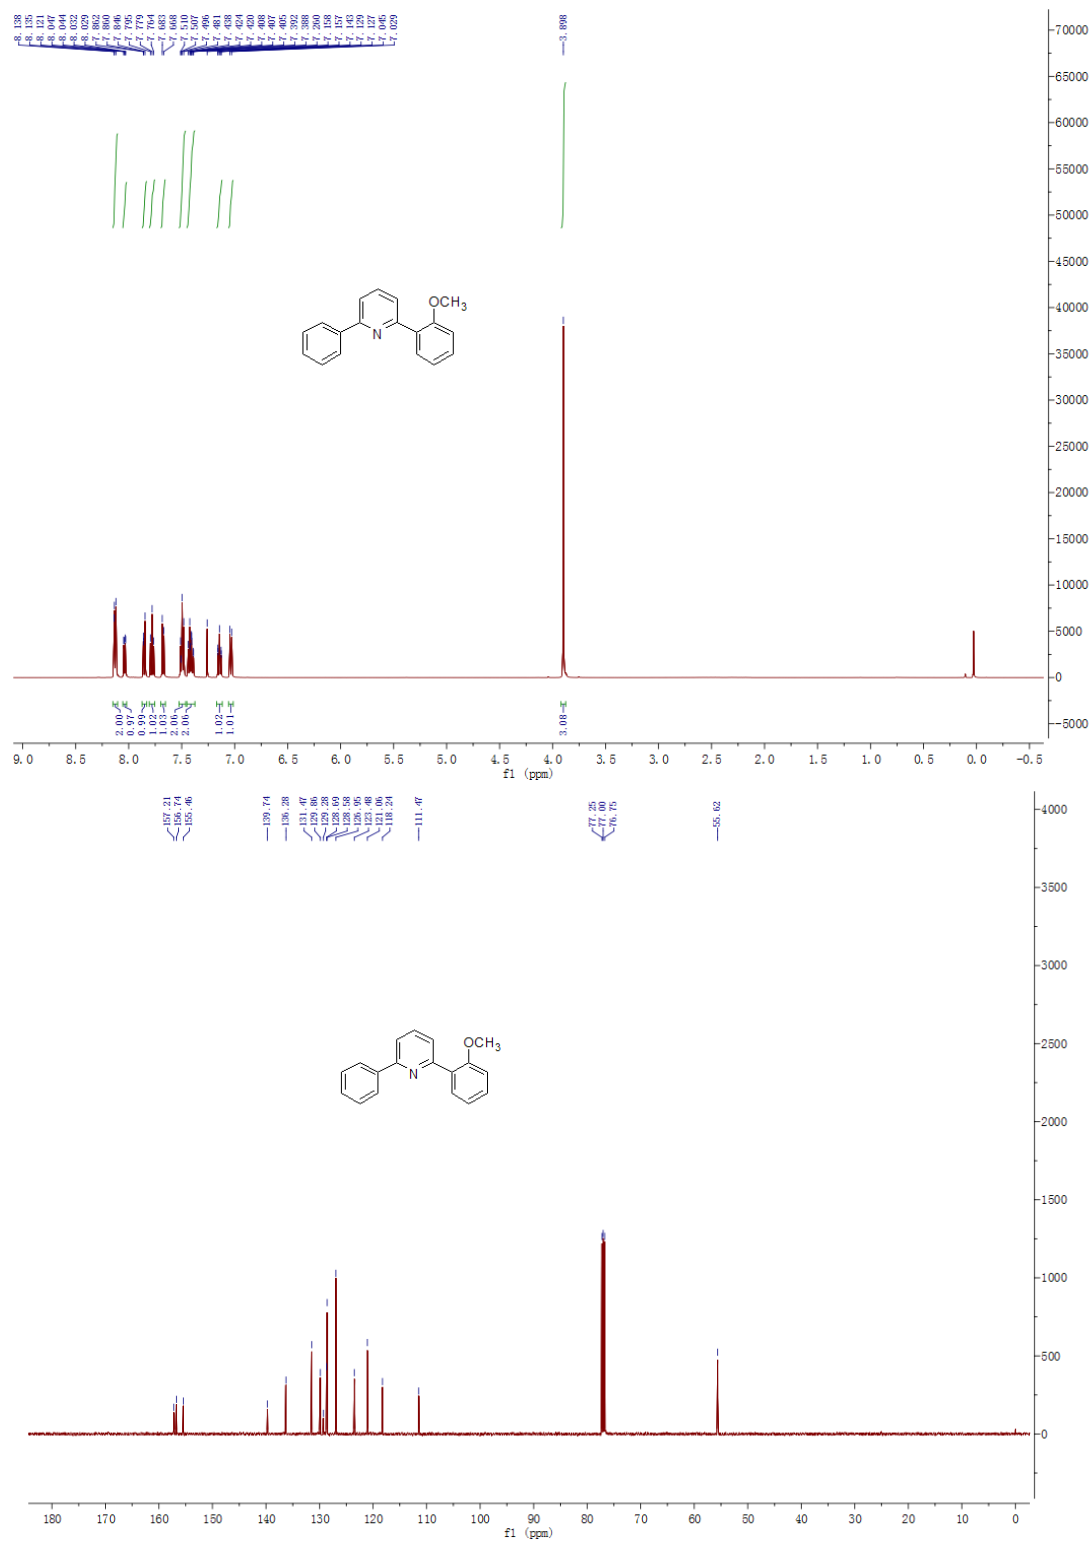

**Figure S6.**  $^1\text{H}$  NMR of **3af** (500 MHz,  $\text{CDCl}_3$ ) and  $^{13}\text{C}$  NMR of **3af** (125 MHz,  $\text{CDCl}_3$ ).

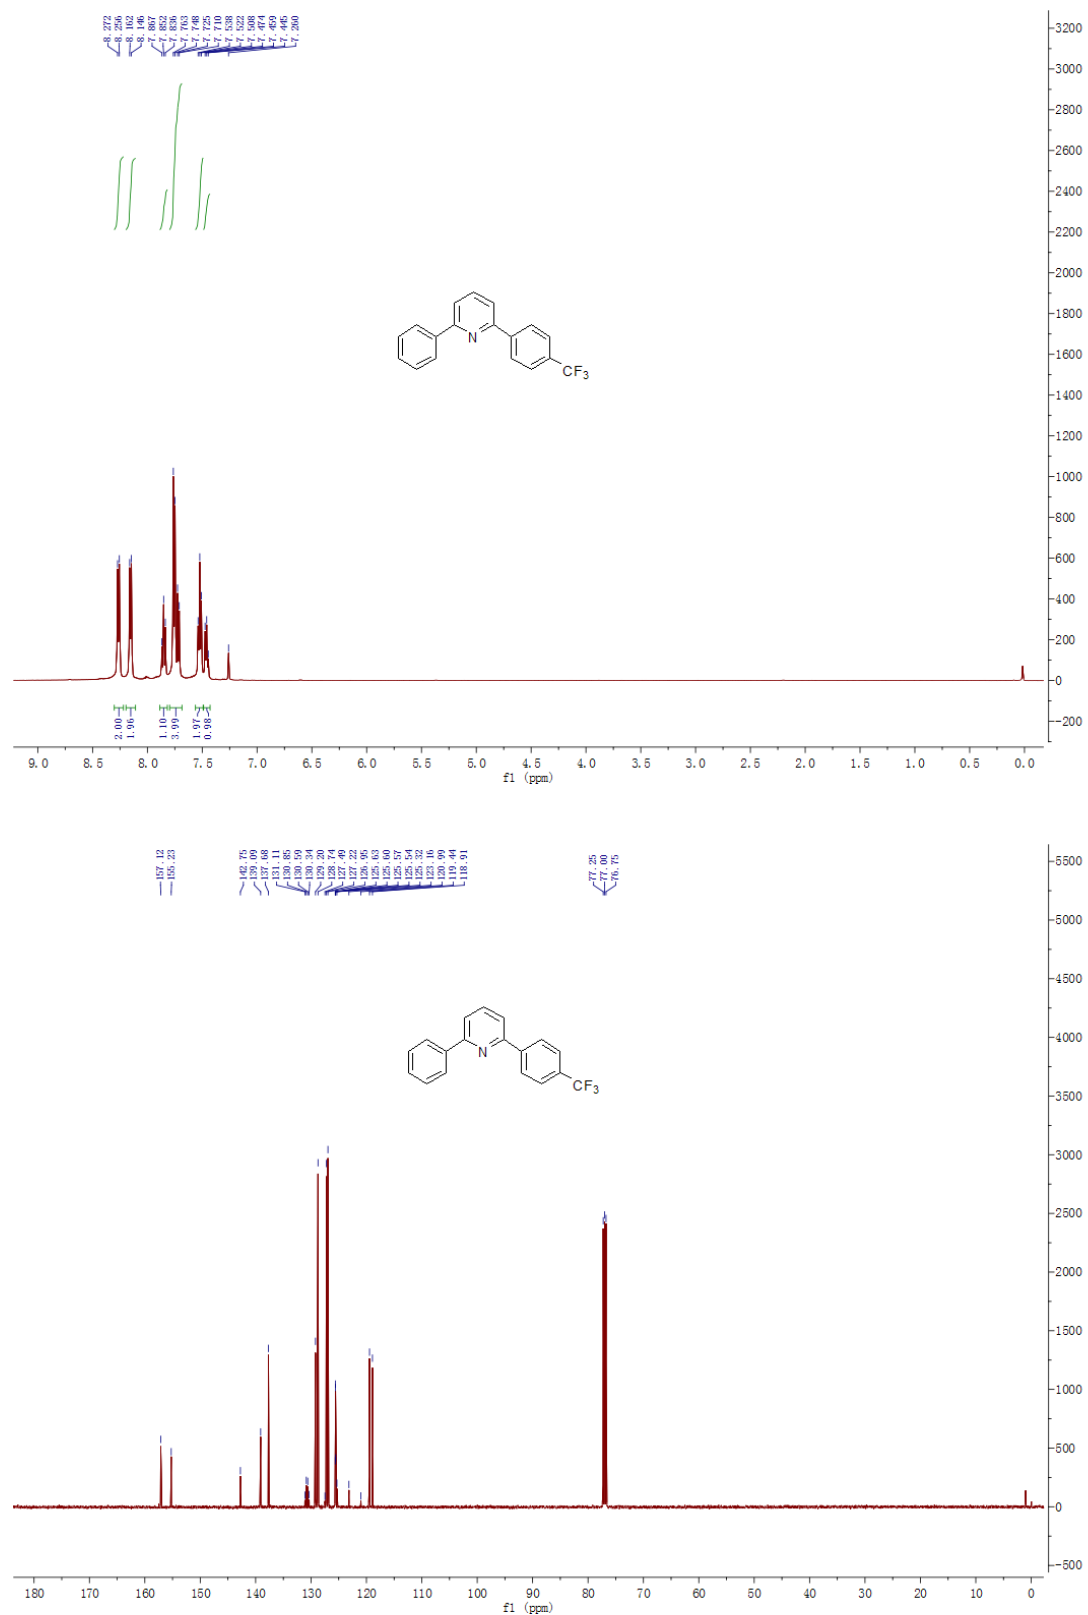

**Figure S7.**  $^1\text{H}$  NMR of **3ag** (500 MHz,  $\text{CDCl}_3$ ) and  $^{13}\text{C}$  NMR of **3ag** (125 MHz,  $\text{CDCl}_3$ ).



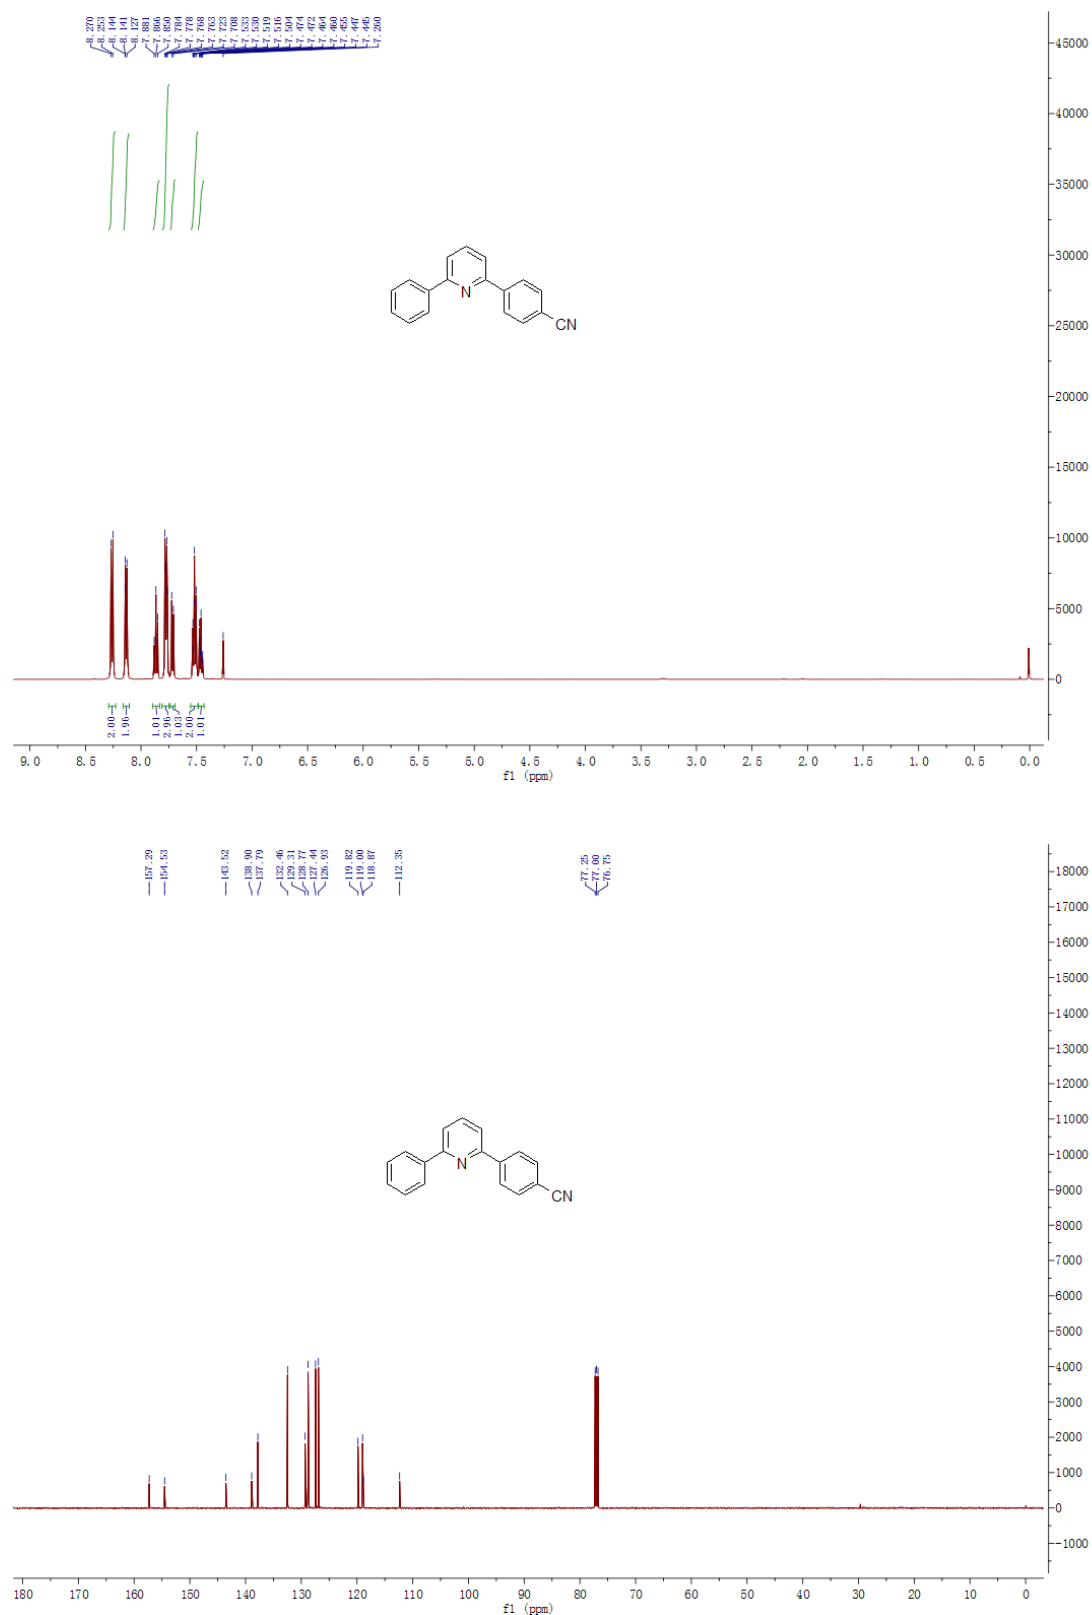

**Figure S8.**  $^1\text{H}$  NMR of **3ah** (500 MHz,  $\text{CDCl}_3$ ) and  $^{13}\text{C}$  NMR of **3ah** (125 MHz,  $\text{CDCl}_3$ ).

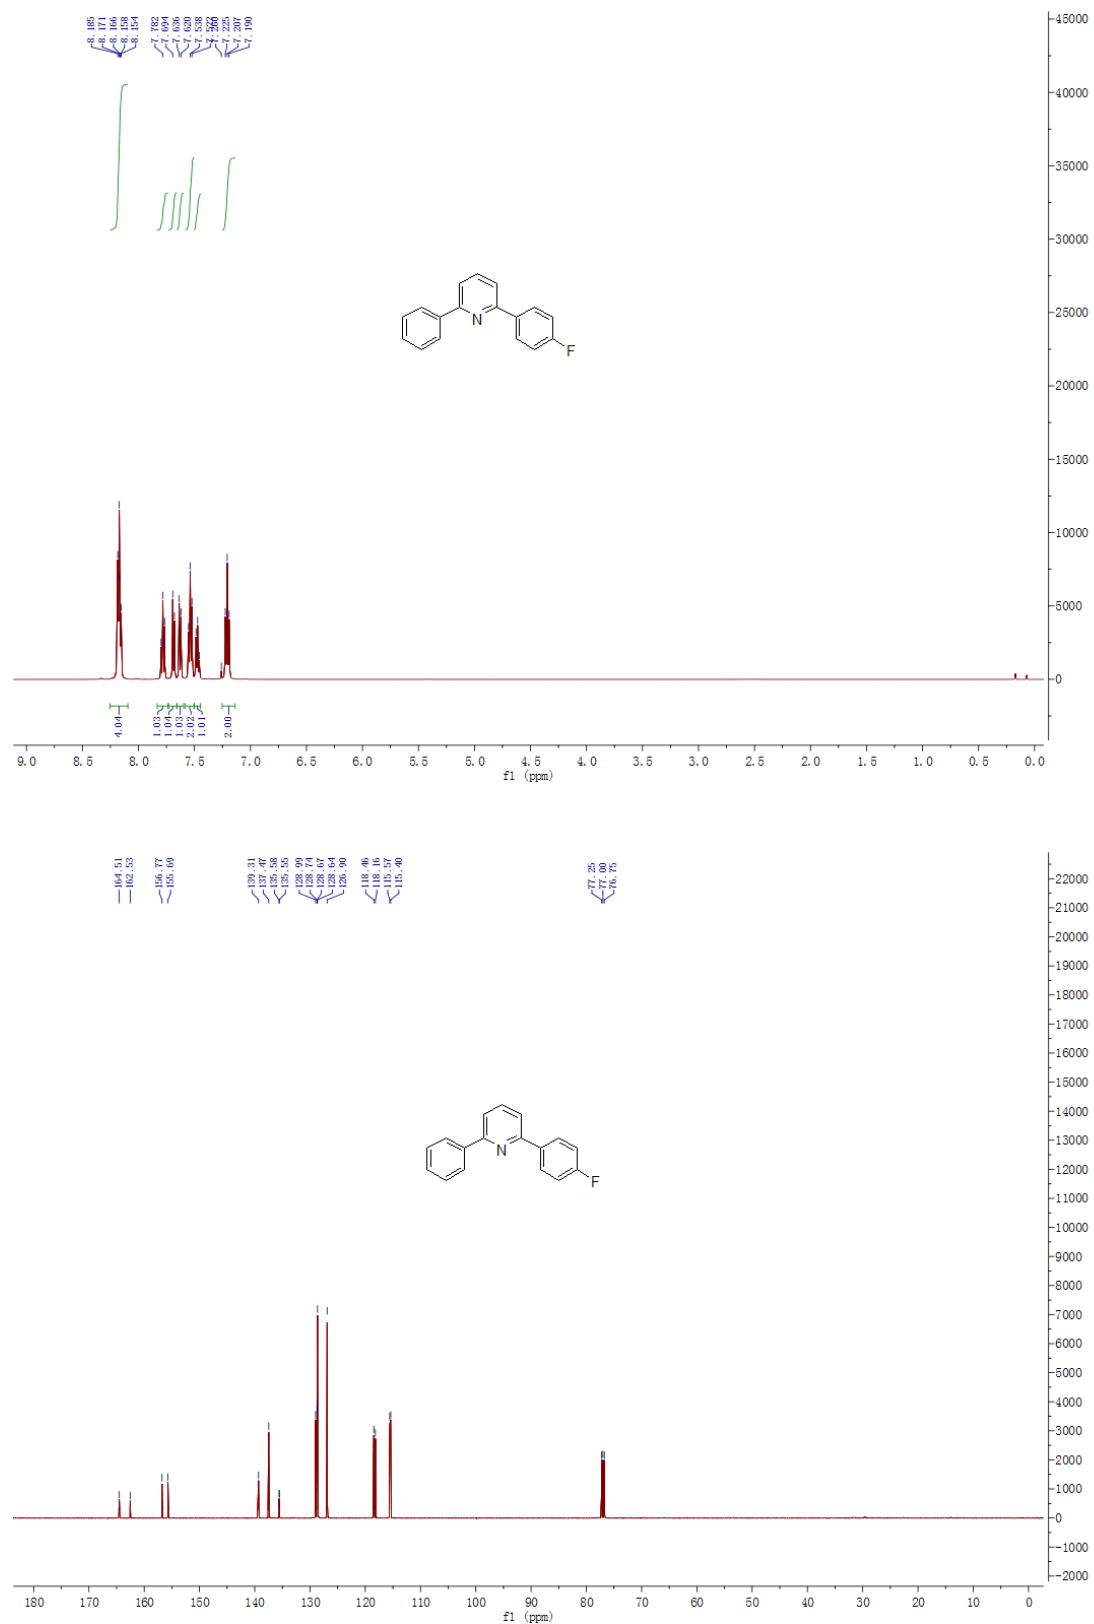

**Figure S9.**  $^1\text{H}$  NMR of **3ai** (500 MHz,  $\text{CDCl}_3$ ) and  $^{13}\text{C}$  NMR of **3ai** (125 MHz,  $\text{CDCl}_3$ ).

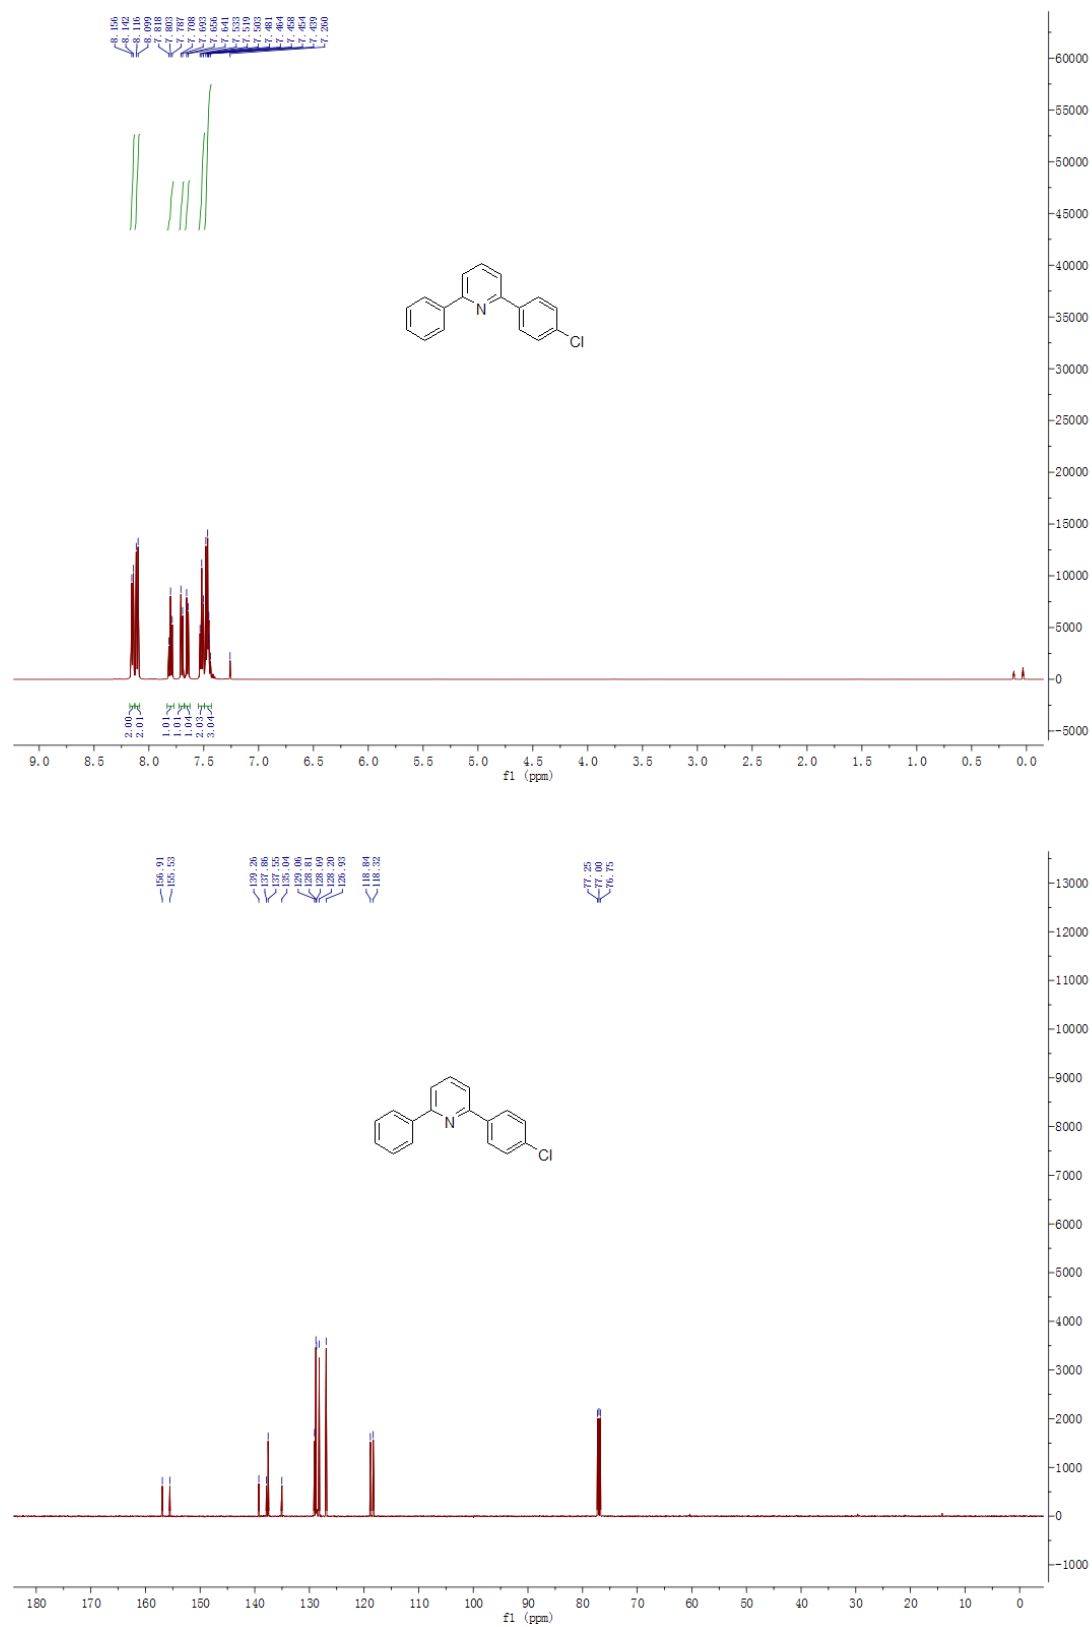

Figure S10. <sup>1</sup>H NMR of 3aj (500 MHz, CDCl<sub>3</sub>) and <sup>13</sup>C NMR of 3aj (125 MHz, CDCl<sub>3</sub>).

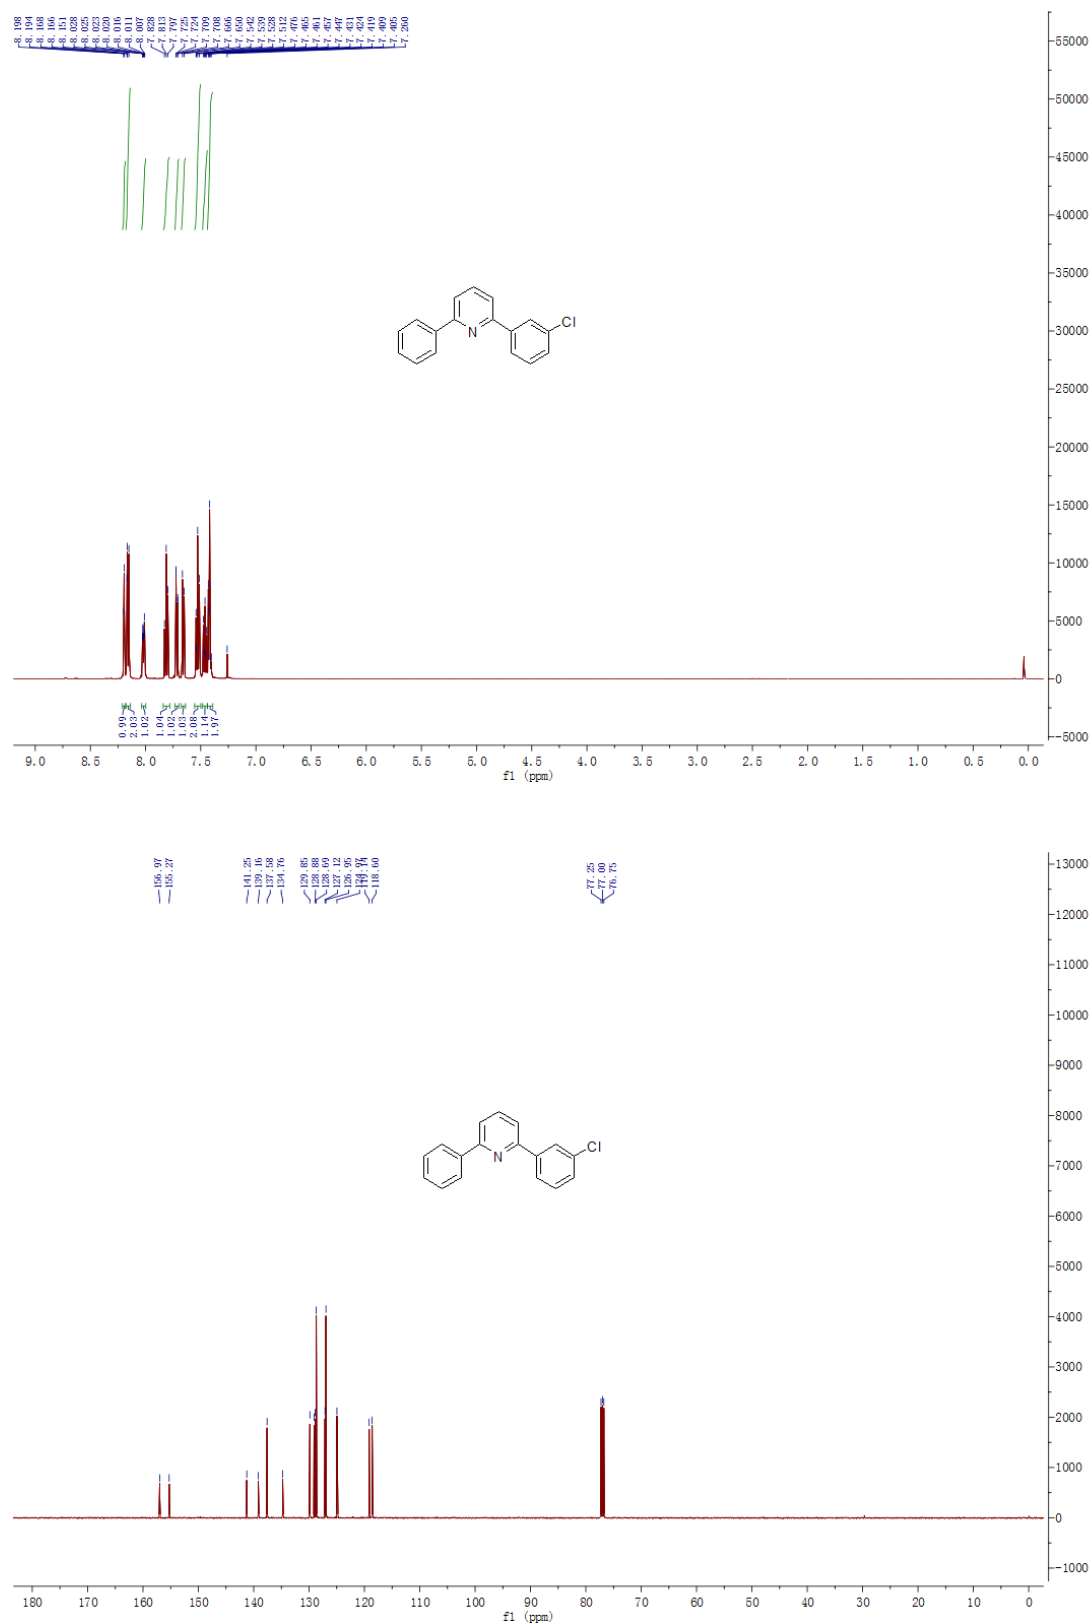

Figure S11. <sup>1</sup>H NMR of **3ak** (500 MHz, CDCl<sub>3</sub>) and <sup>13</sup>C NMR of **3ak** (125 MHz, CDCl<sub>3</sub>).

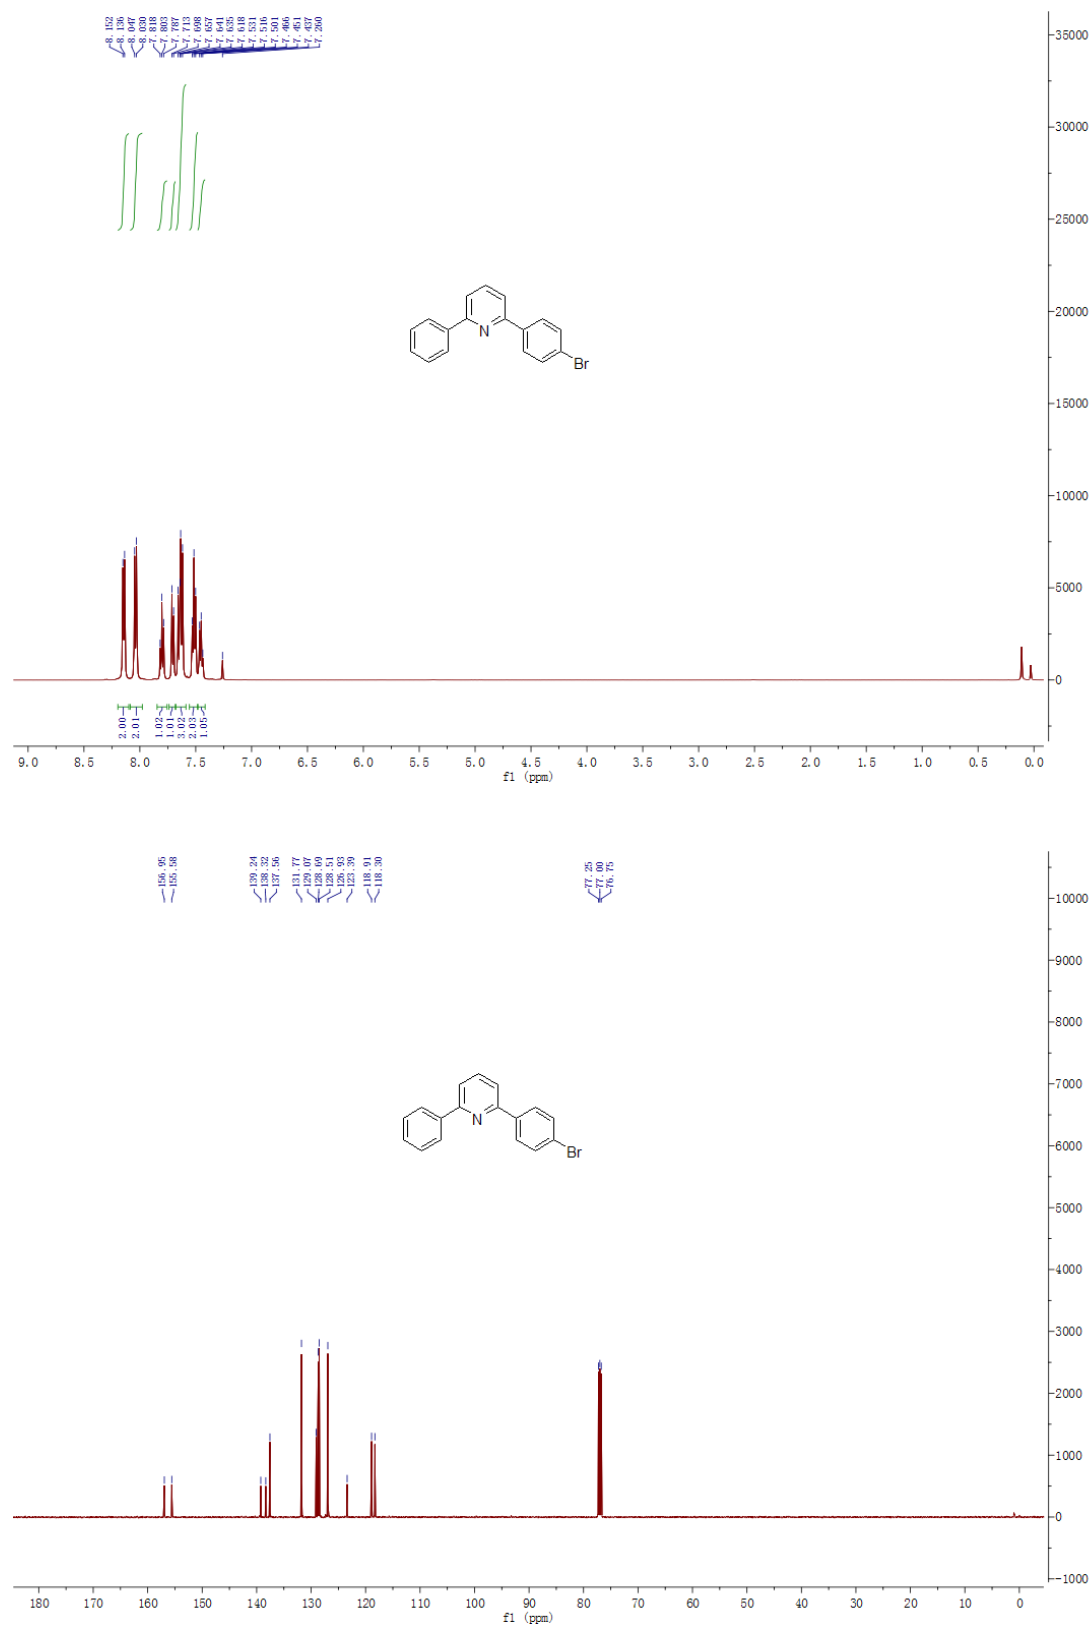

**Figure S12.** <sup>1</sup>H NMR of **3al** (500 MHz, CDCl<sub>3</sub>) and <sup>13</sup>C NMR of **3al** (125 MHz, CDCl<sub>3</sub>).

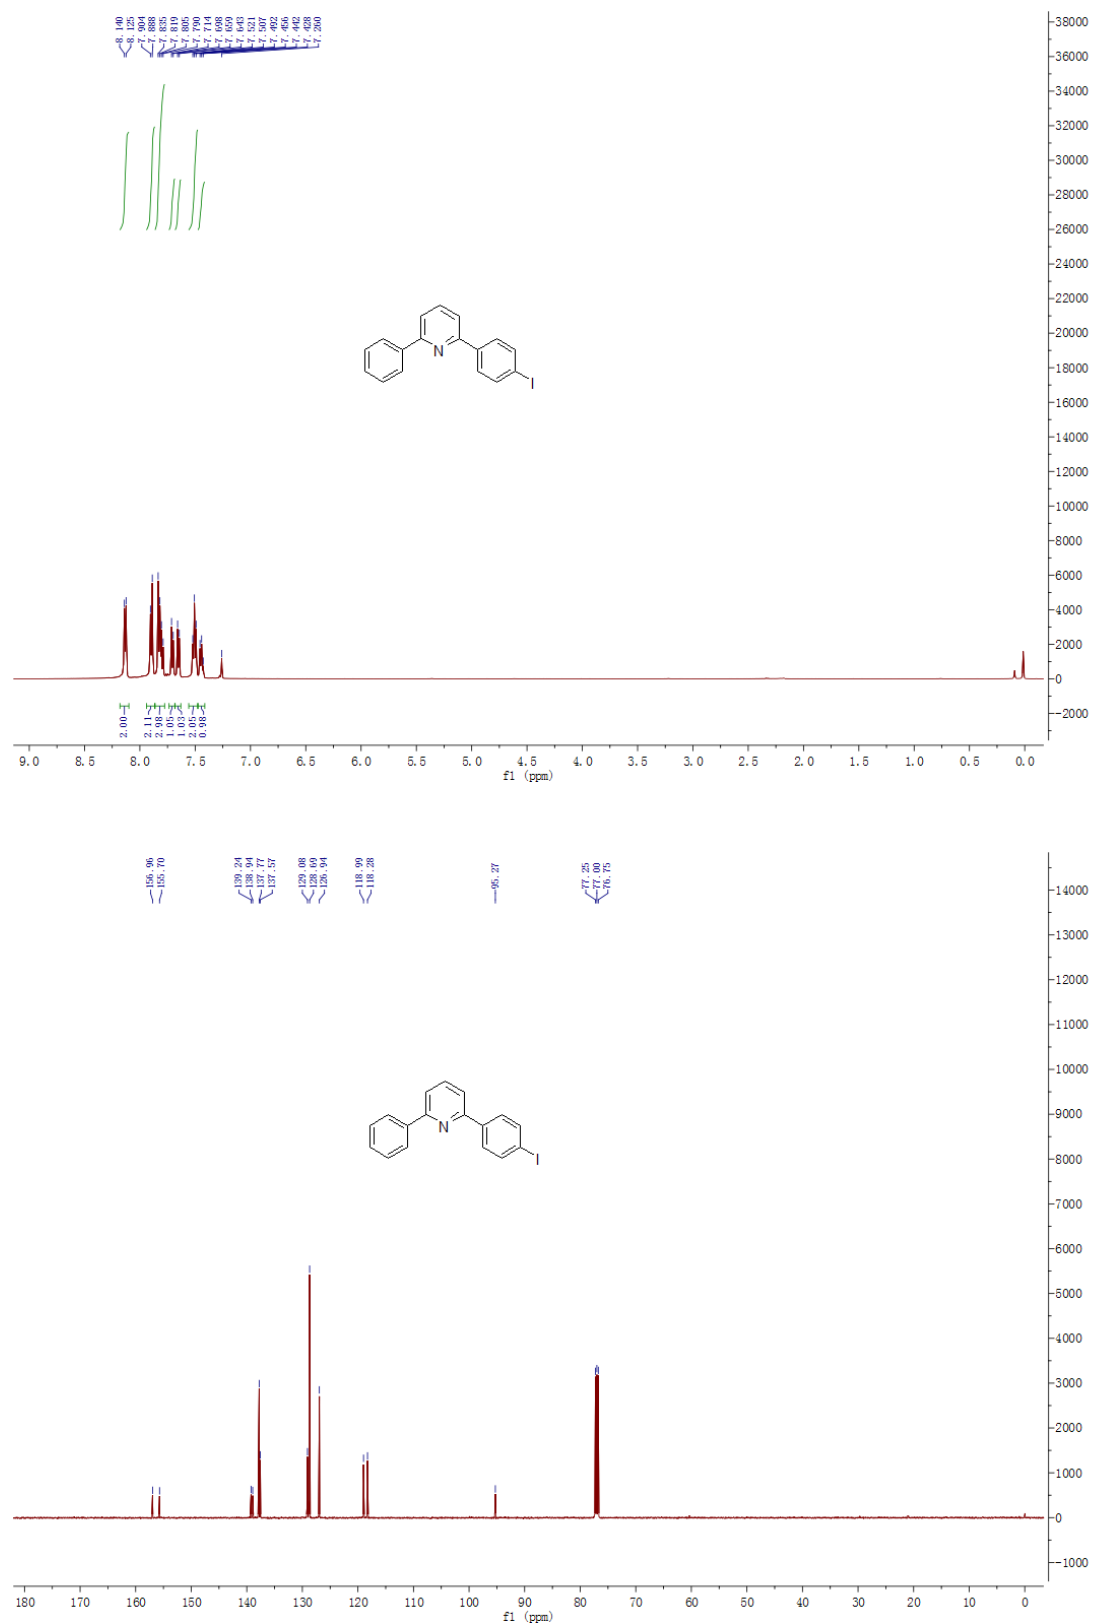

**Figure S13.**  $^1\text{H}$  NMR of **3am** (500 MHz,  $\text{CDCl}_3$ ) and  $^{13}\text{C}$  NMR of **3am** (125 MHz,  $\text{CDCl}_3$ ).



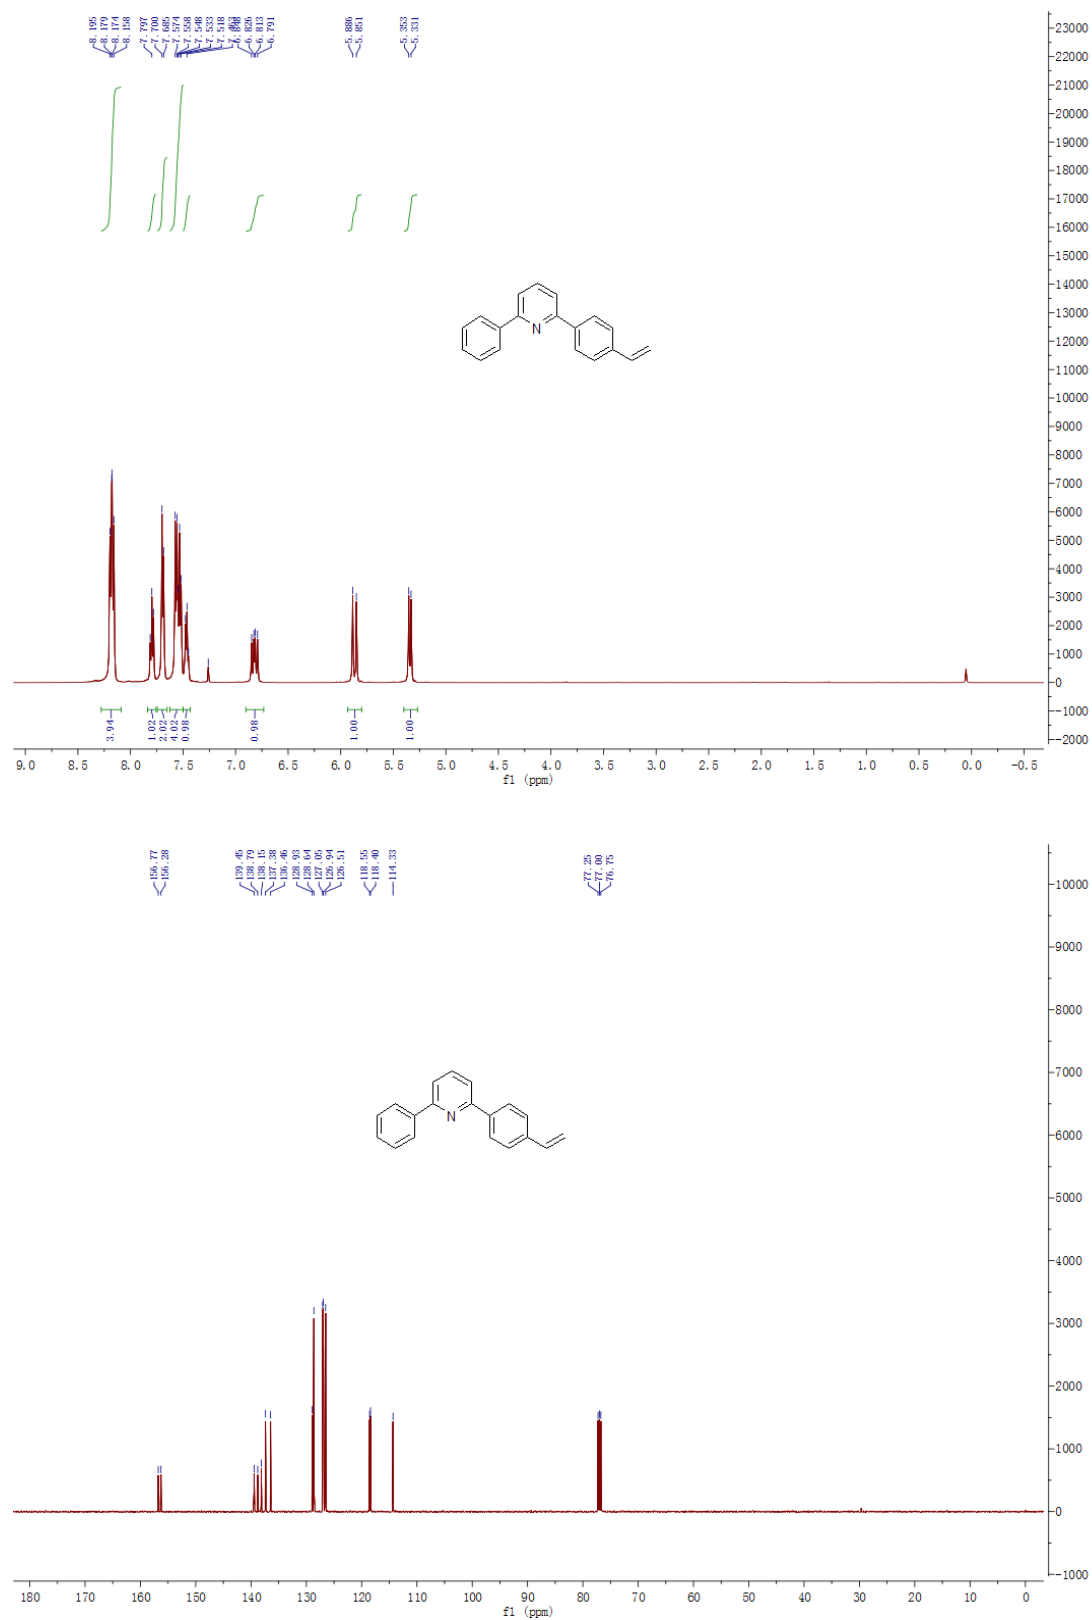

**Figure S15.**  $^1\text{H}$  NMR of **3ao** (500 MHz,  $\text{CDCl}_3$ ) and  $^{13}\text{C}$  NMR of **3ao** (125 MHz,  $\text{CDCl}_3$ ).



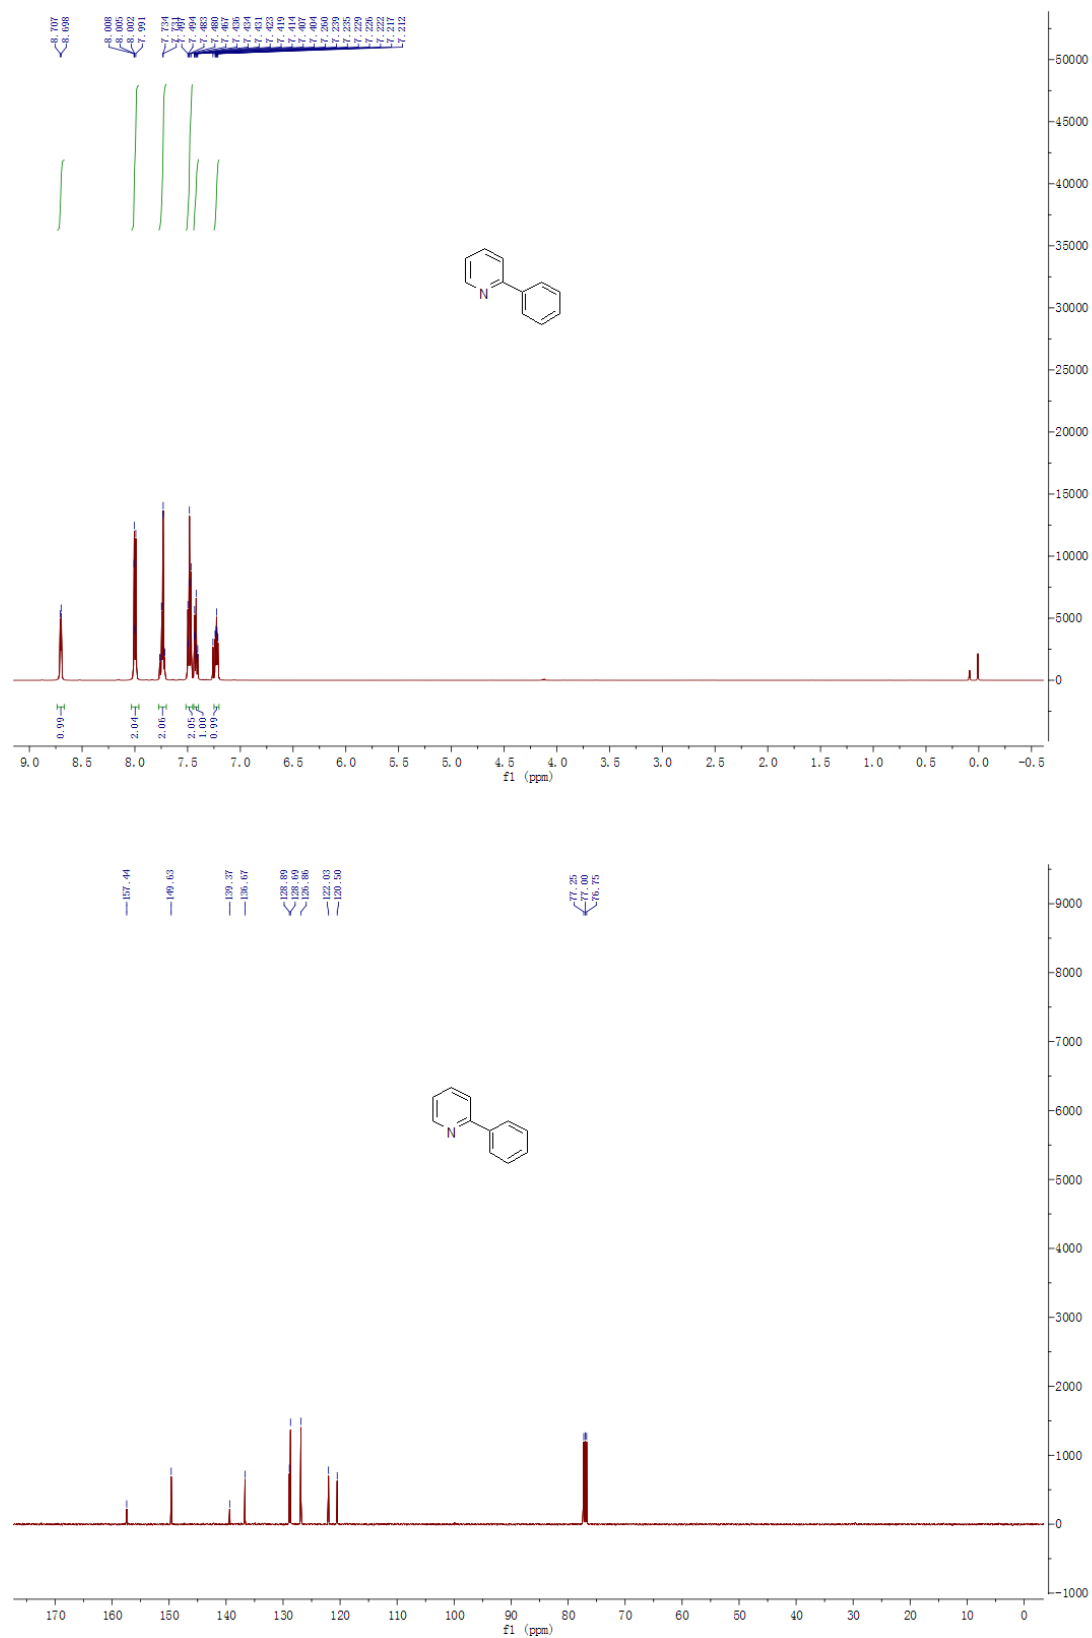

**Figure 16.** <sup>1</sup>H NMR of **3ea** (500 MHz, CDCl<sub>3</sub>) and <sup>13</sup>C NMR of **3ea** (125 MHz, CDCl<sub>3</sub>).

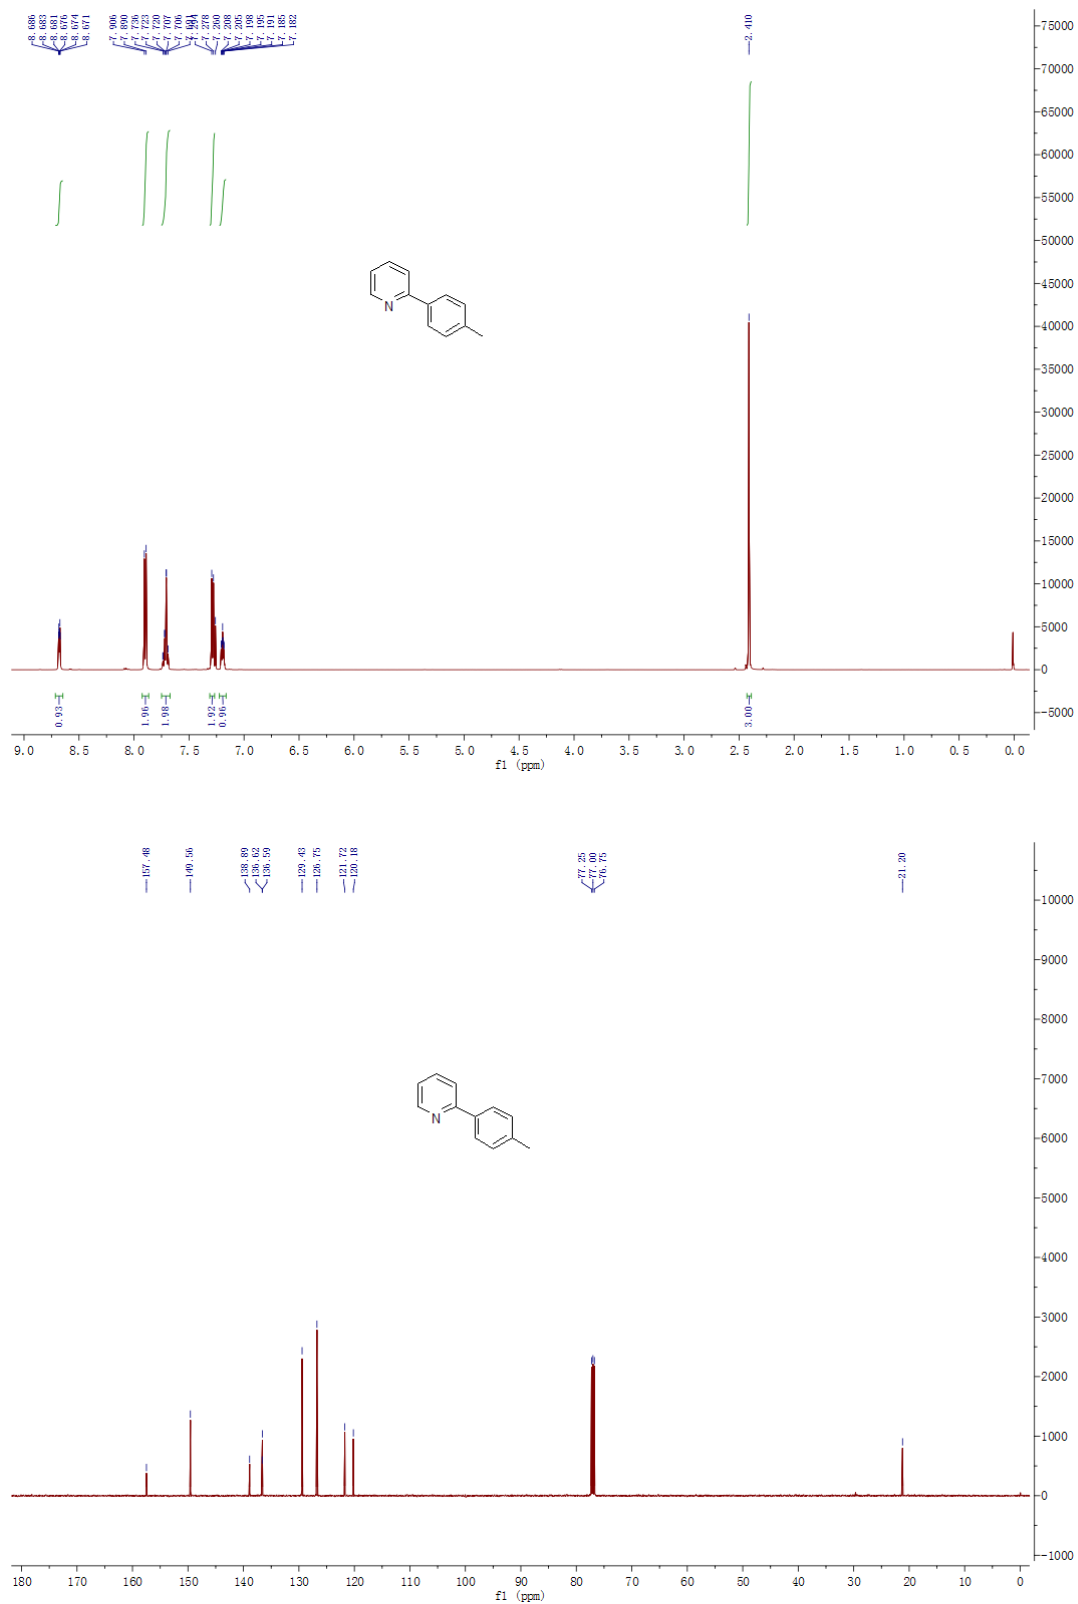

**Figure S17.** <sup>1</sup>H NMR of **3eb** (500 MHz, CDCl<sub>3</sub>) and <sup>13</sup>C NMR of **3eb** (125 MHz, CDCl<sub>3</sub>).

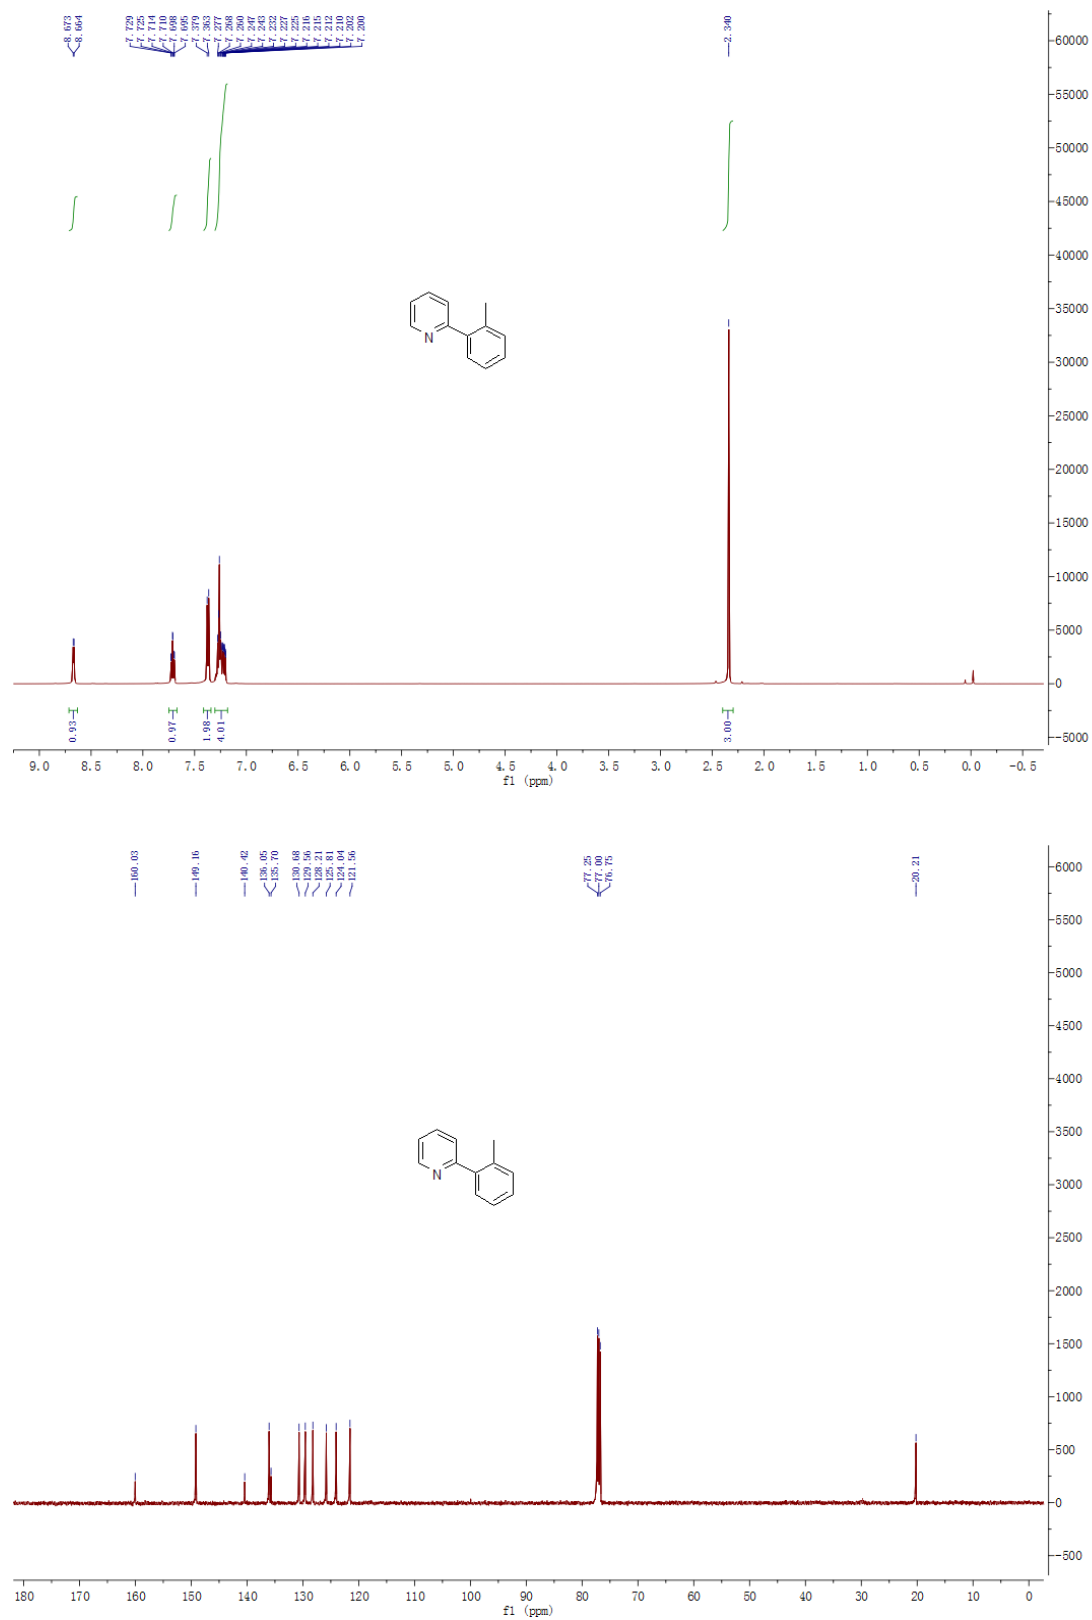

**Figure 18.** <sup>1</sup>H NMR of **3ec** (500 MHz, CDCl<sub>3</sub>) and <sup>13</sup>C NMR of **3ec** (125 MHz, CDCl<sub>3</sub>).

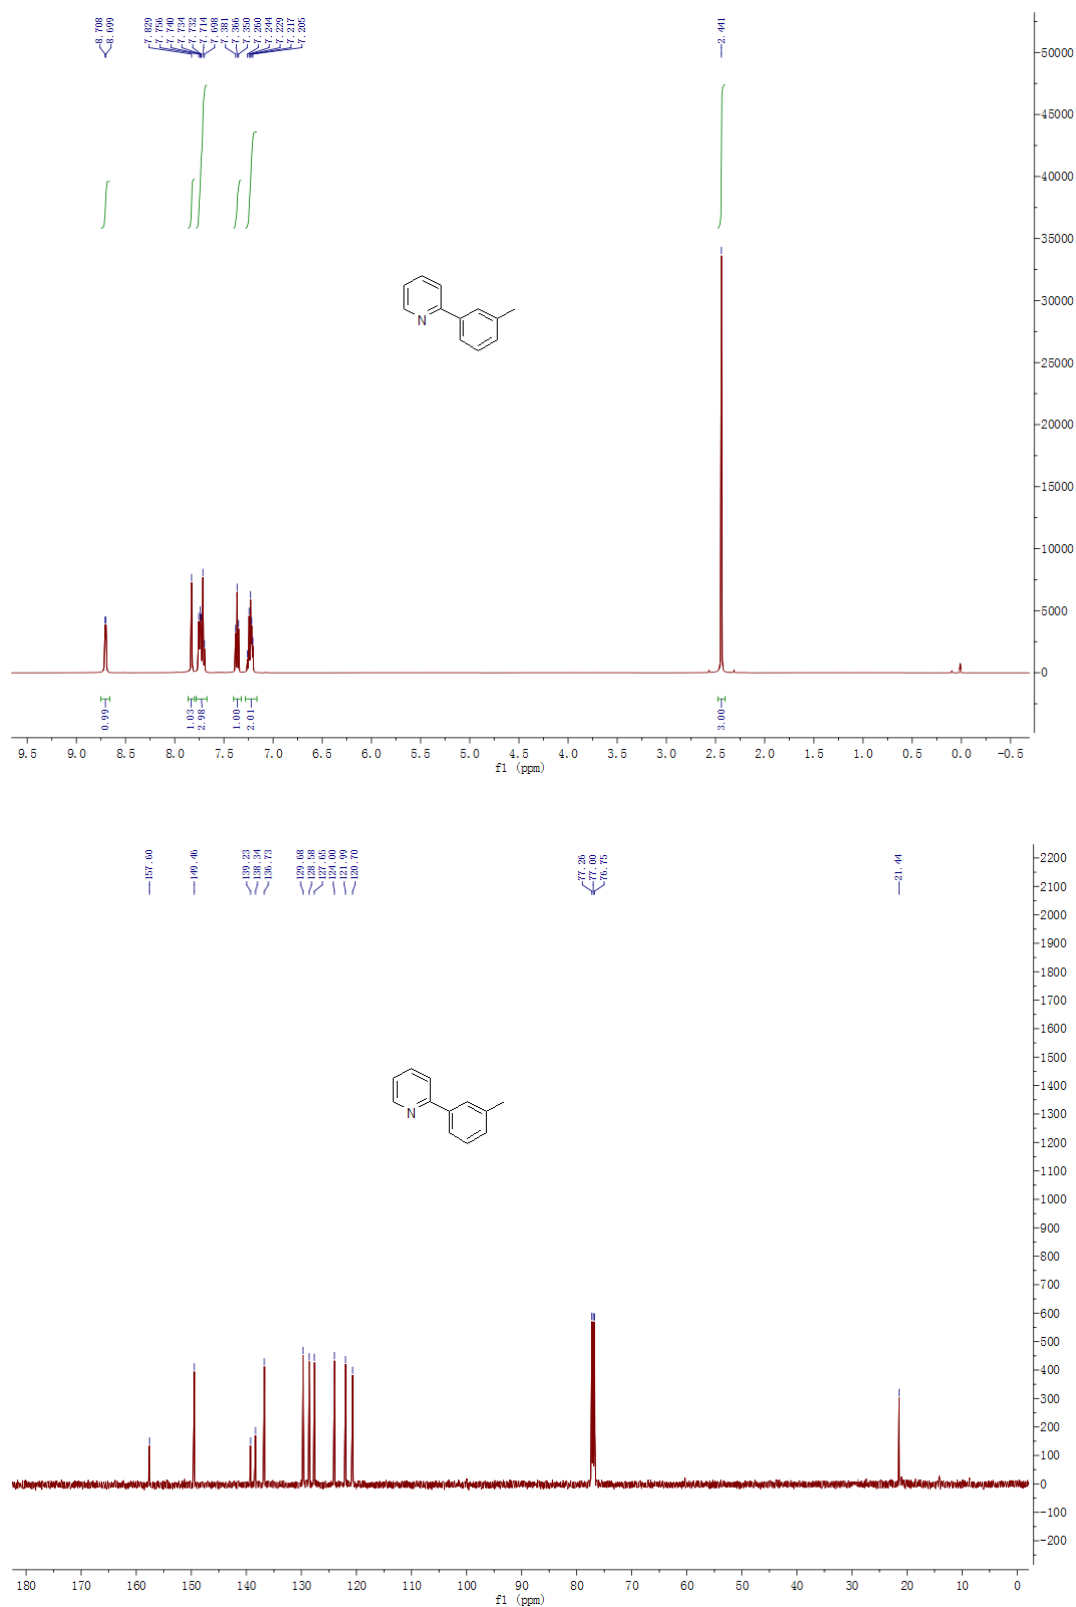

**Figure S19.** <sup>1</sup>H NMR of **3ed** (500 MHz, CDCl<sub>3</sub>) and <sup>13</sup>C NMR of **3ed** (125 MHz, CDCl<sub>3</sub>).

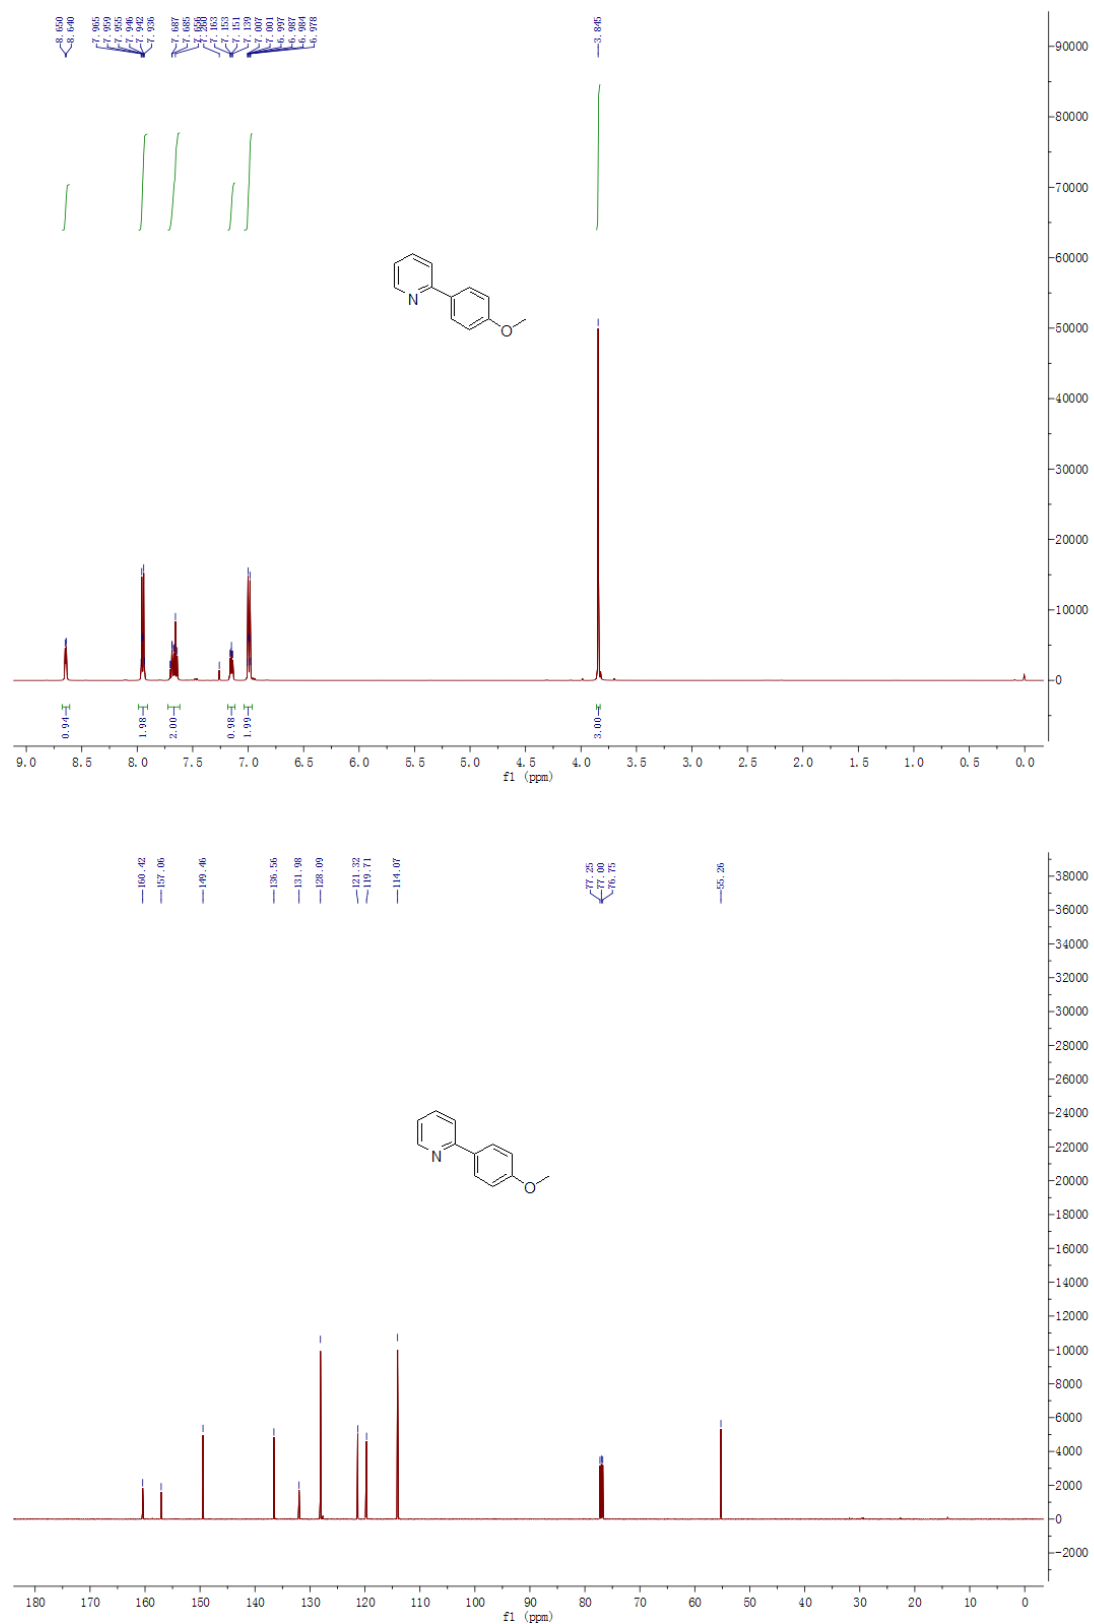

**Figure S20.** <sup>1</sup>H NMR of **3ee** (500 MHz, CDCl<sub>3</sub>) and <sup>13</sup>C NMR of **3ee** (125 MHz, CDCl<sub>3</sub>).

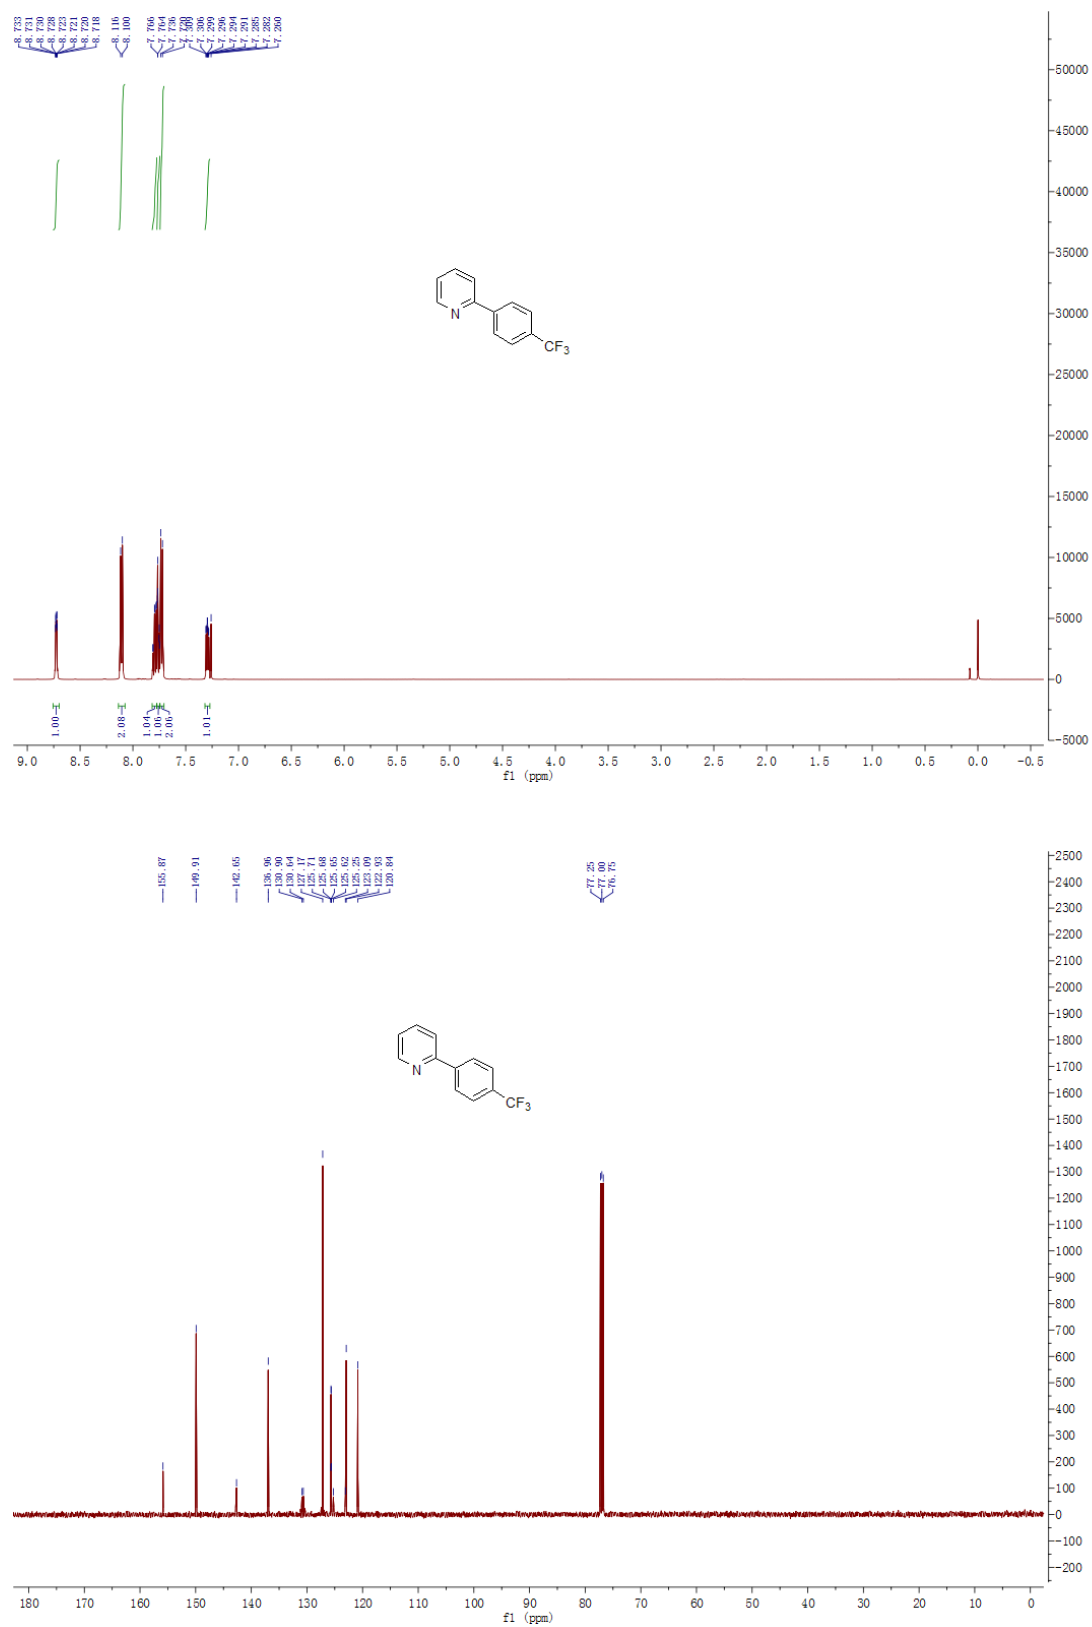

Figure S21. <sup>1</sup>H NMR of **3eg** (500 MHz, CDCl<sub>3</sub>) and <sup>13</sup>C NMR of **3eg** (125 MHz, CDCl<sub>3</sub>).

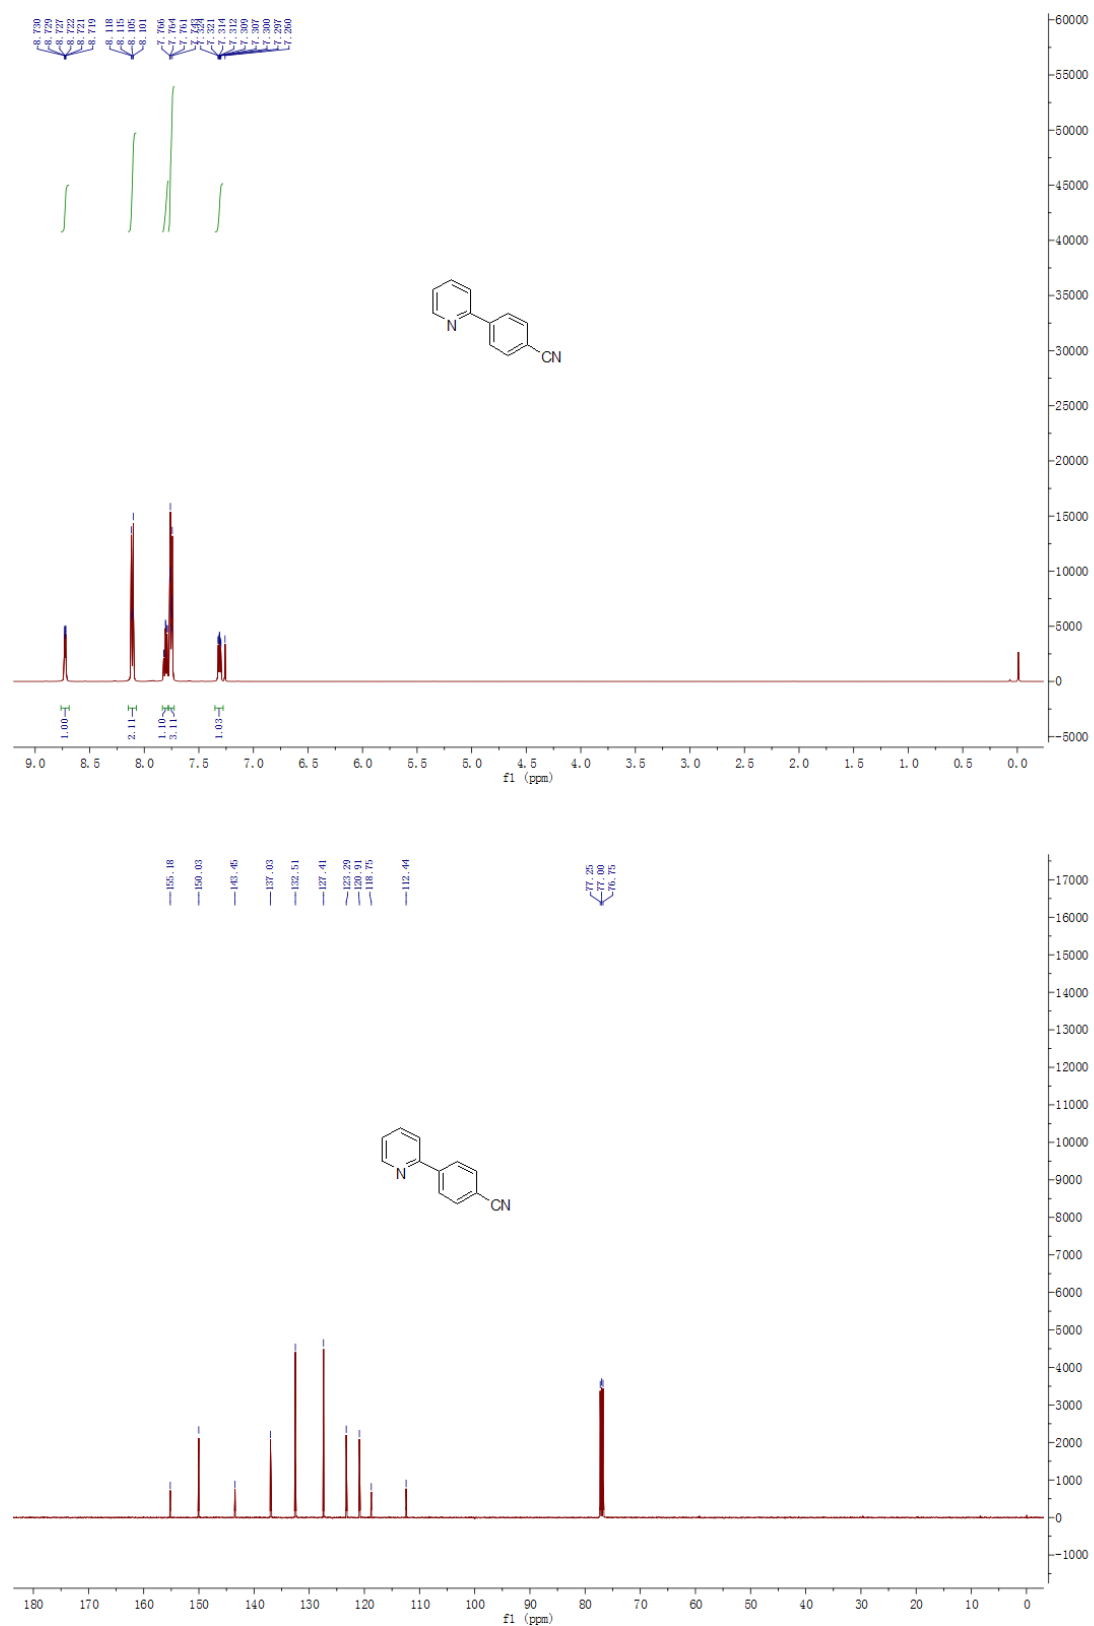

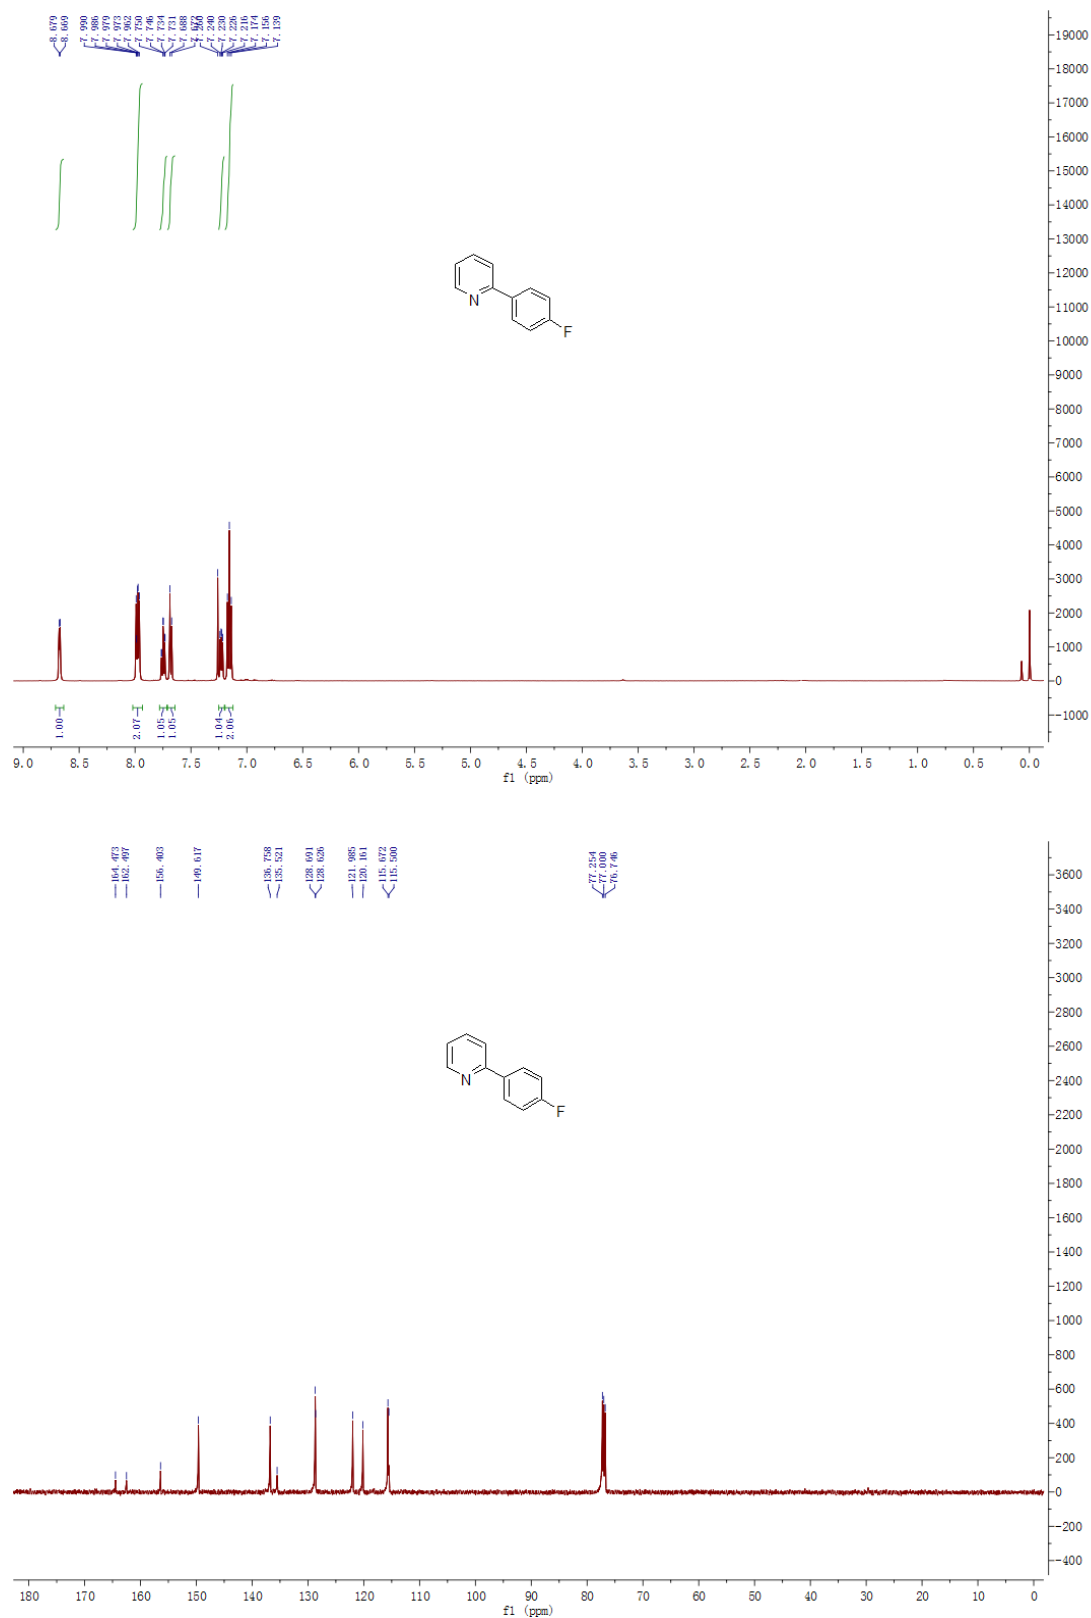

**Figure S23.** <sup>1</sup>H NMR of **3ei** (500 MHz, CDCl<sub>3</sub>) and <sup>13</sup>C NMR of **3ei** (125 MHz, CDCl<sub>3</sub>).



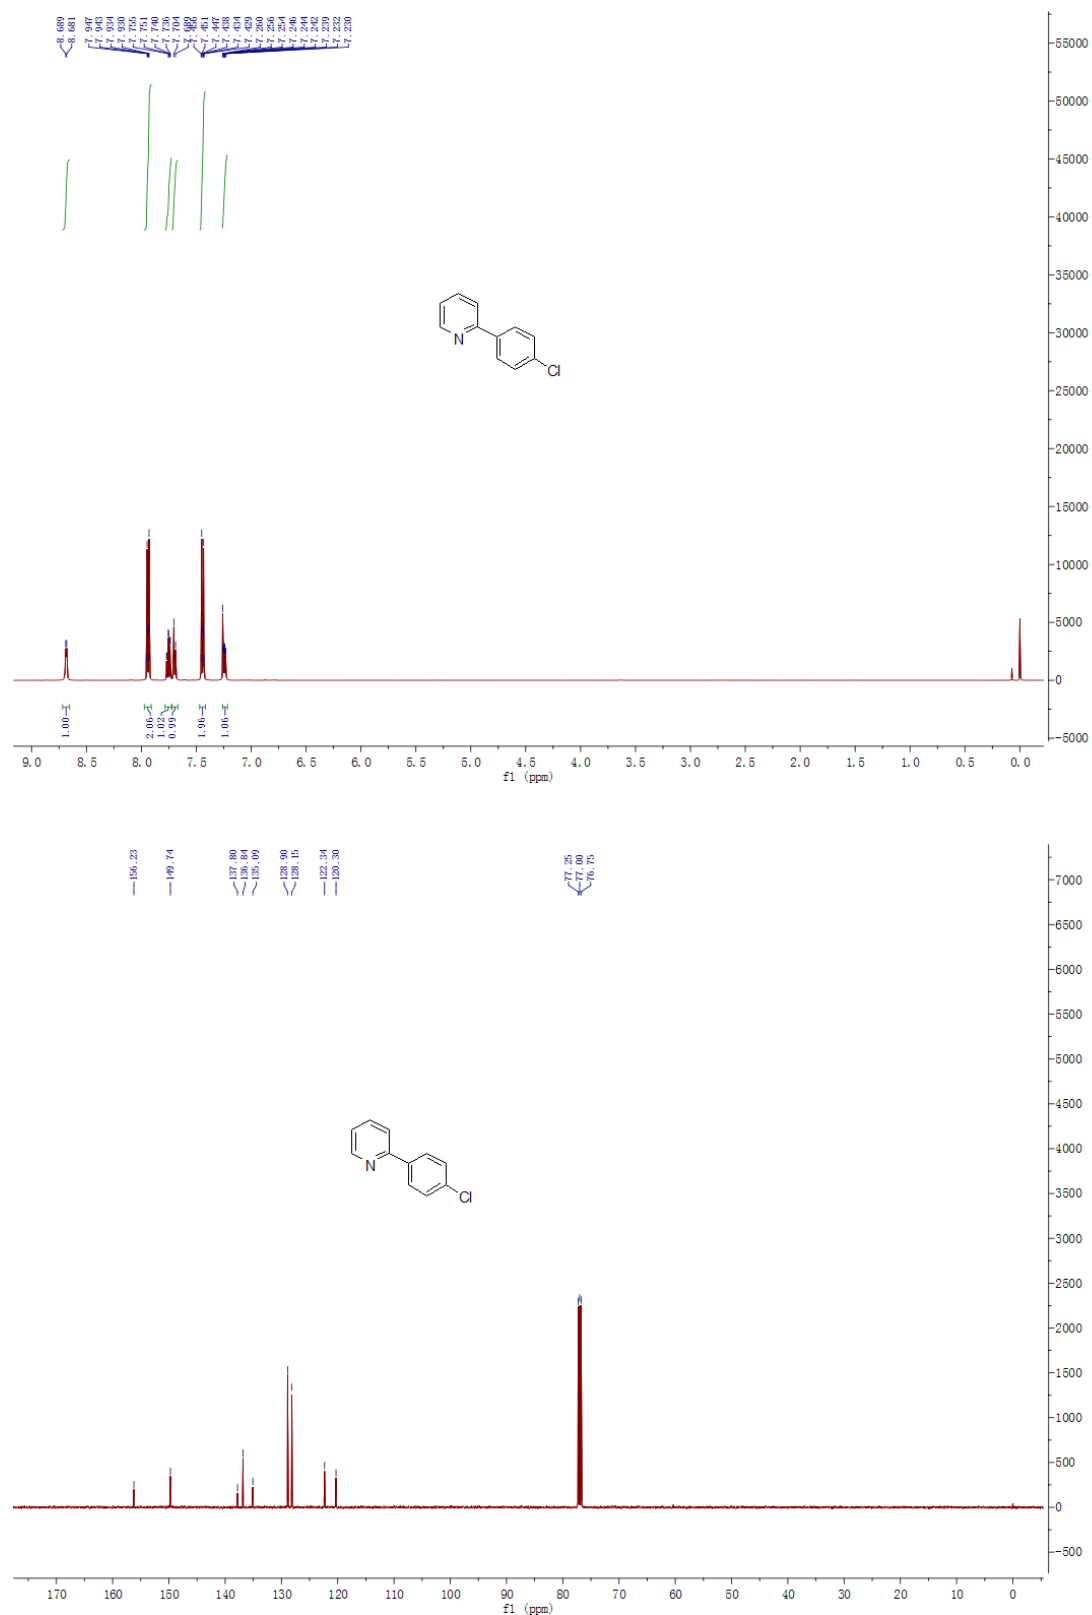

**Figure S24.** <sup>1</sup>H NMR of **3ej** (500 MHz, CDCl<sub>3</sub>) and <sup>13</sup>C NMR of **3ej** (125 MHz, CDCl<sub>3</sub>).

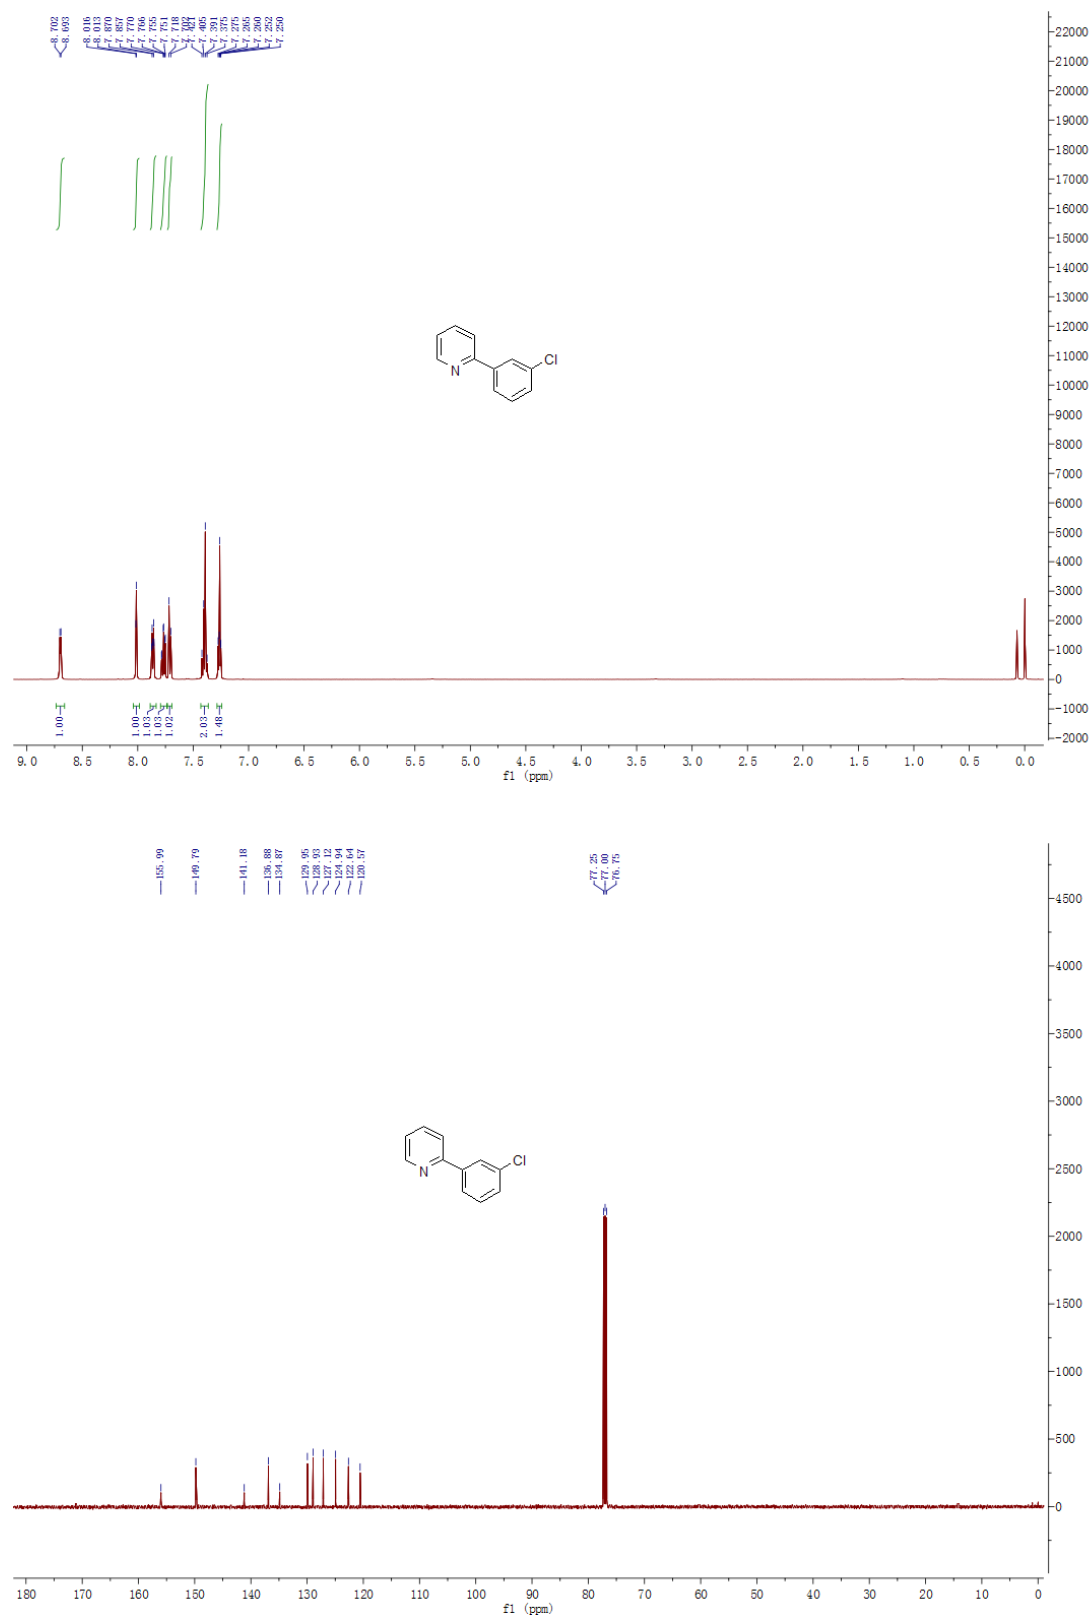

Figure S25. <sup>1</sup>H NMR of **3ek** (500 MHz, CDCl<sub>3</sub>) and <sup>13</sup>C NMR of **3ek** (125 MHz, CDCl<sub>3</sub>).

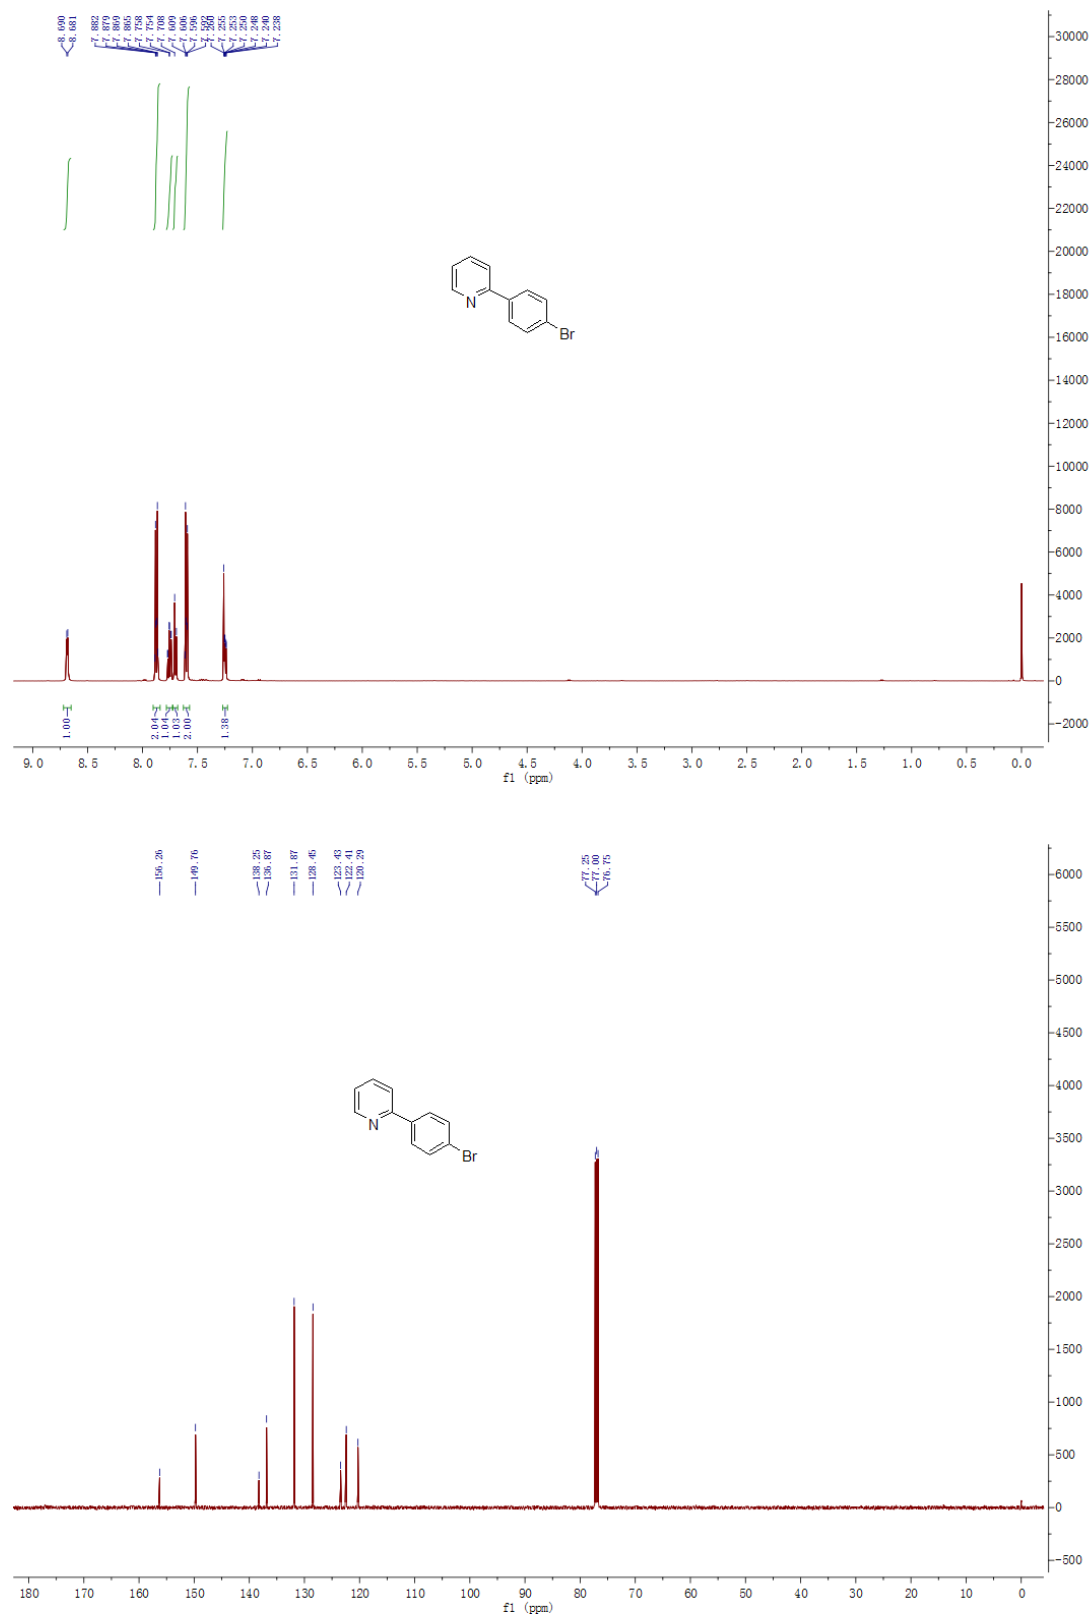

**Figure S26.** <sup>1</sup>H NMR of **3el** (500 MHz, CDCl<sub>3</sub>) and <sup>13</sup>C NMR of **3el** (125 MHz, CDCl<sub>3</sub>).

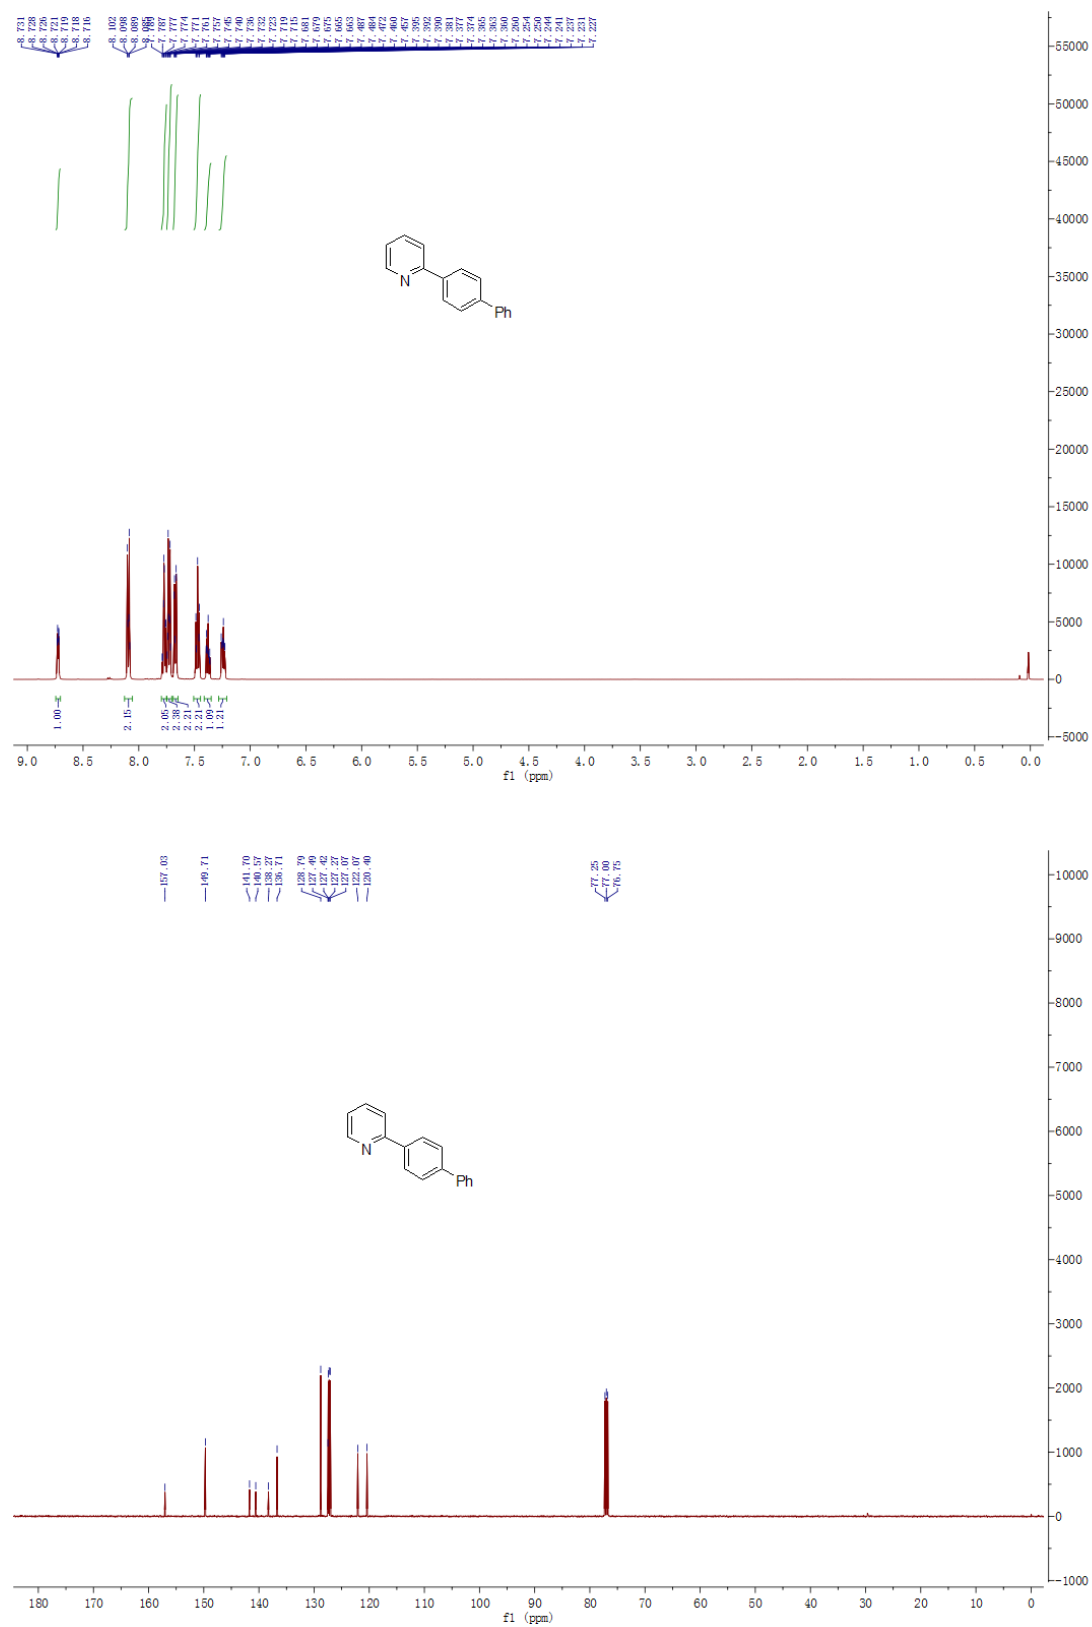

Figure S27. <sup>1</sup>H NMR of **3en** (500 MHz, CDCl<sub>3</sub>) and <sup>13</sup>C NMR of **3en** (125 MHz, CDCl<sub>3</sub>).

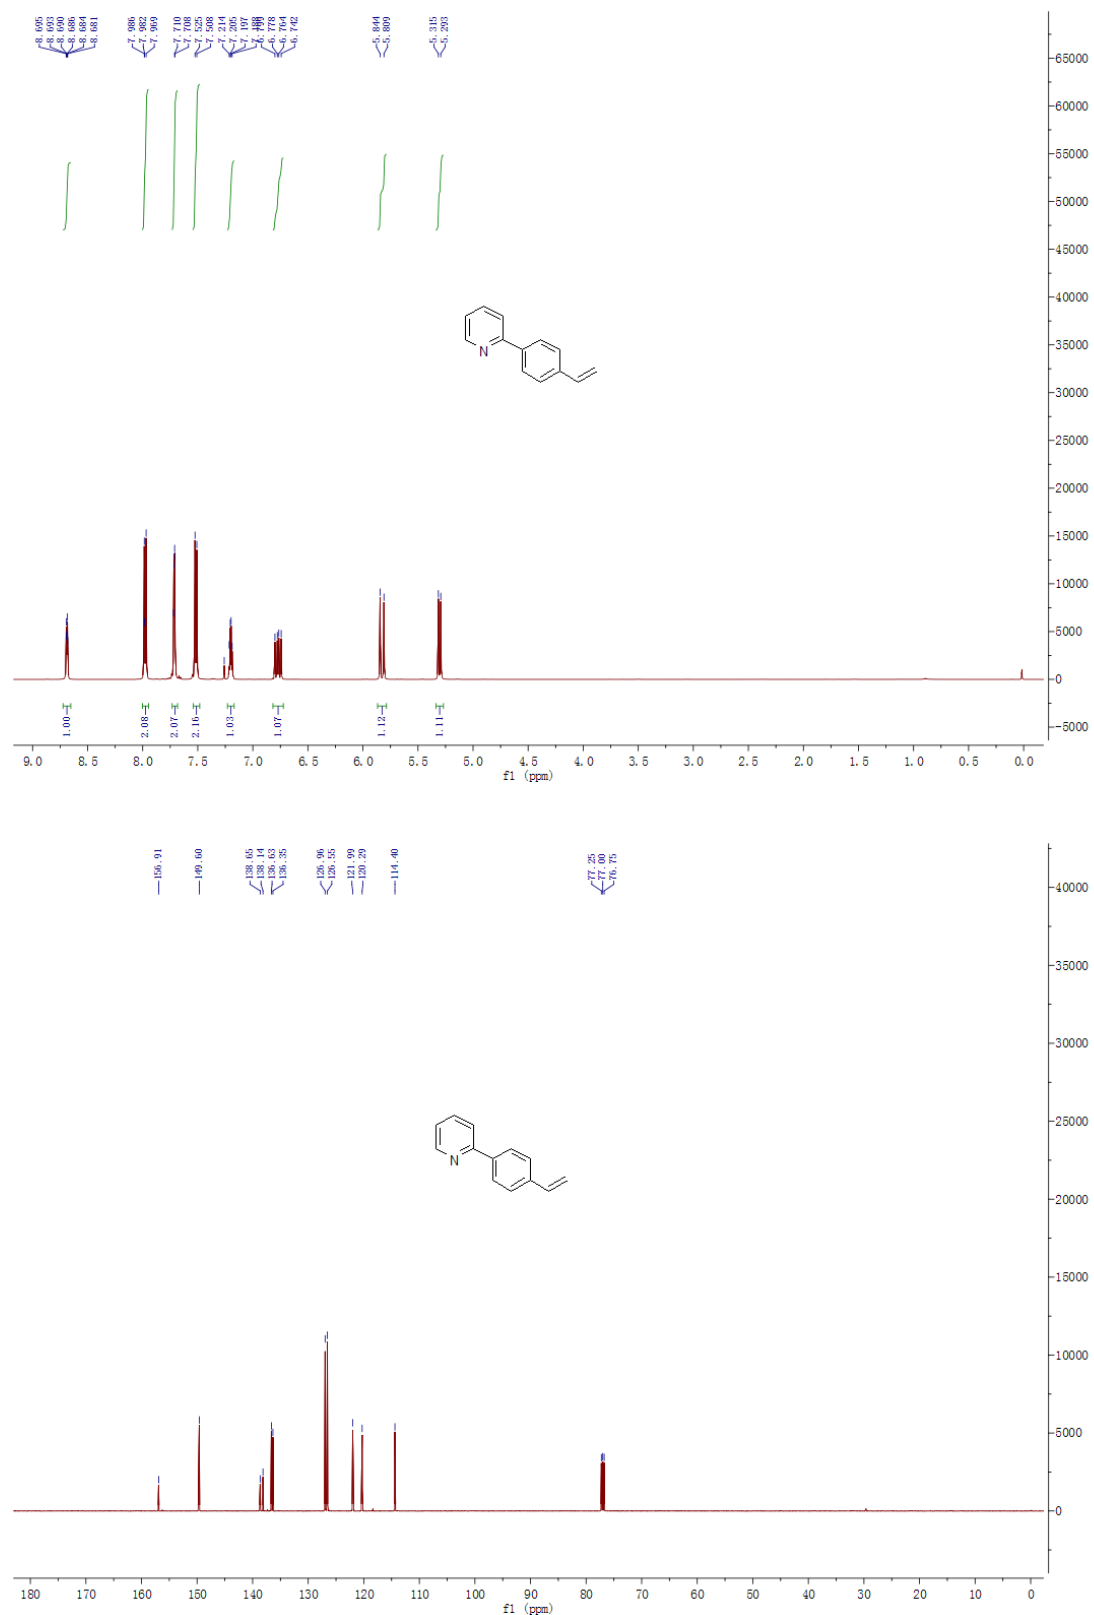

**Figure S28.**  $^1\text{H}$  NMR of **3eo** (500 MHz,  $\text{CDCl}_3$ ) and  $^{13}\text{C}$  NMR of **3eo** (125 MHz,  $\text{CDCl}_3$ ).

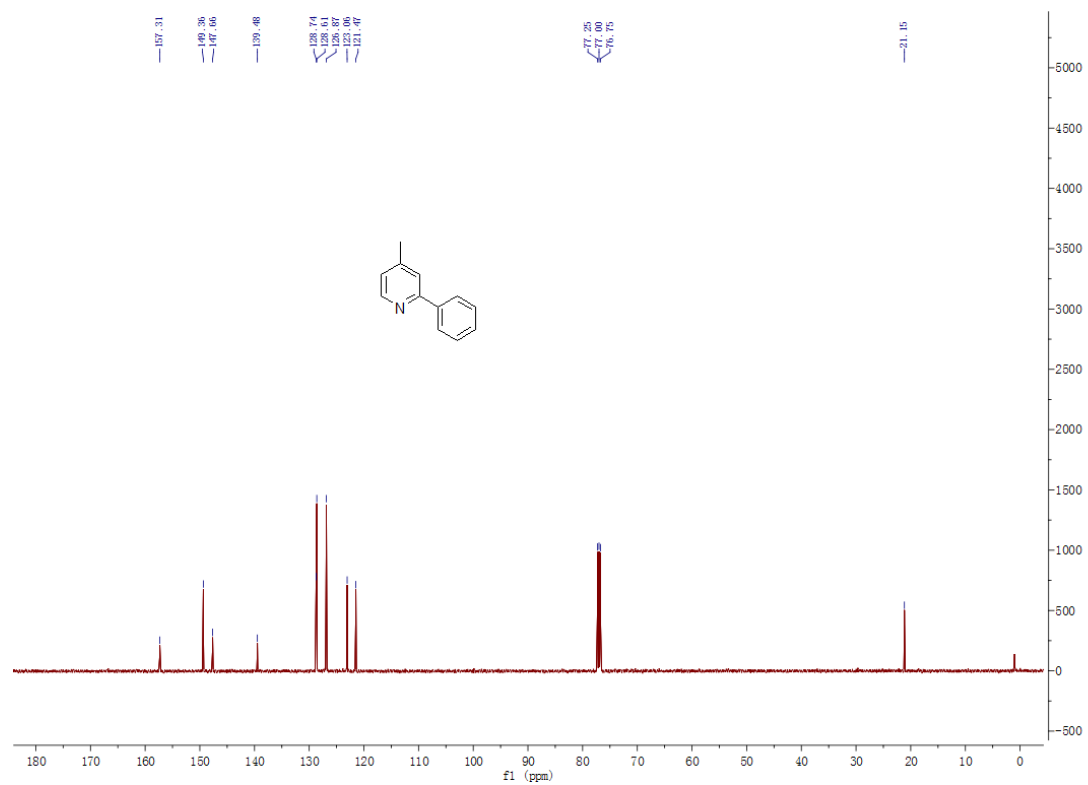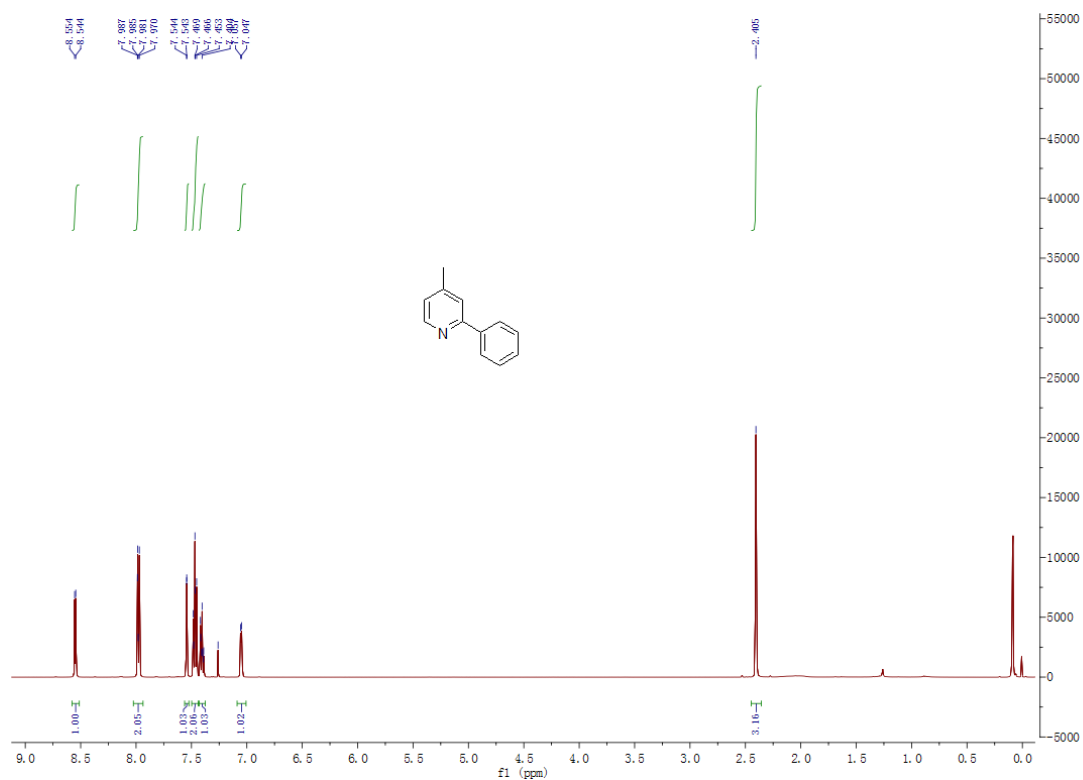

**Figure S29.** <sup>1</sup>H NMR of **3fa** (500 MHz, CDCl<sub>3</sub>) and <sup>13</sup>C NMR of **3fa** (125 MHz, CDCl<sub>3</sub>).

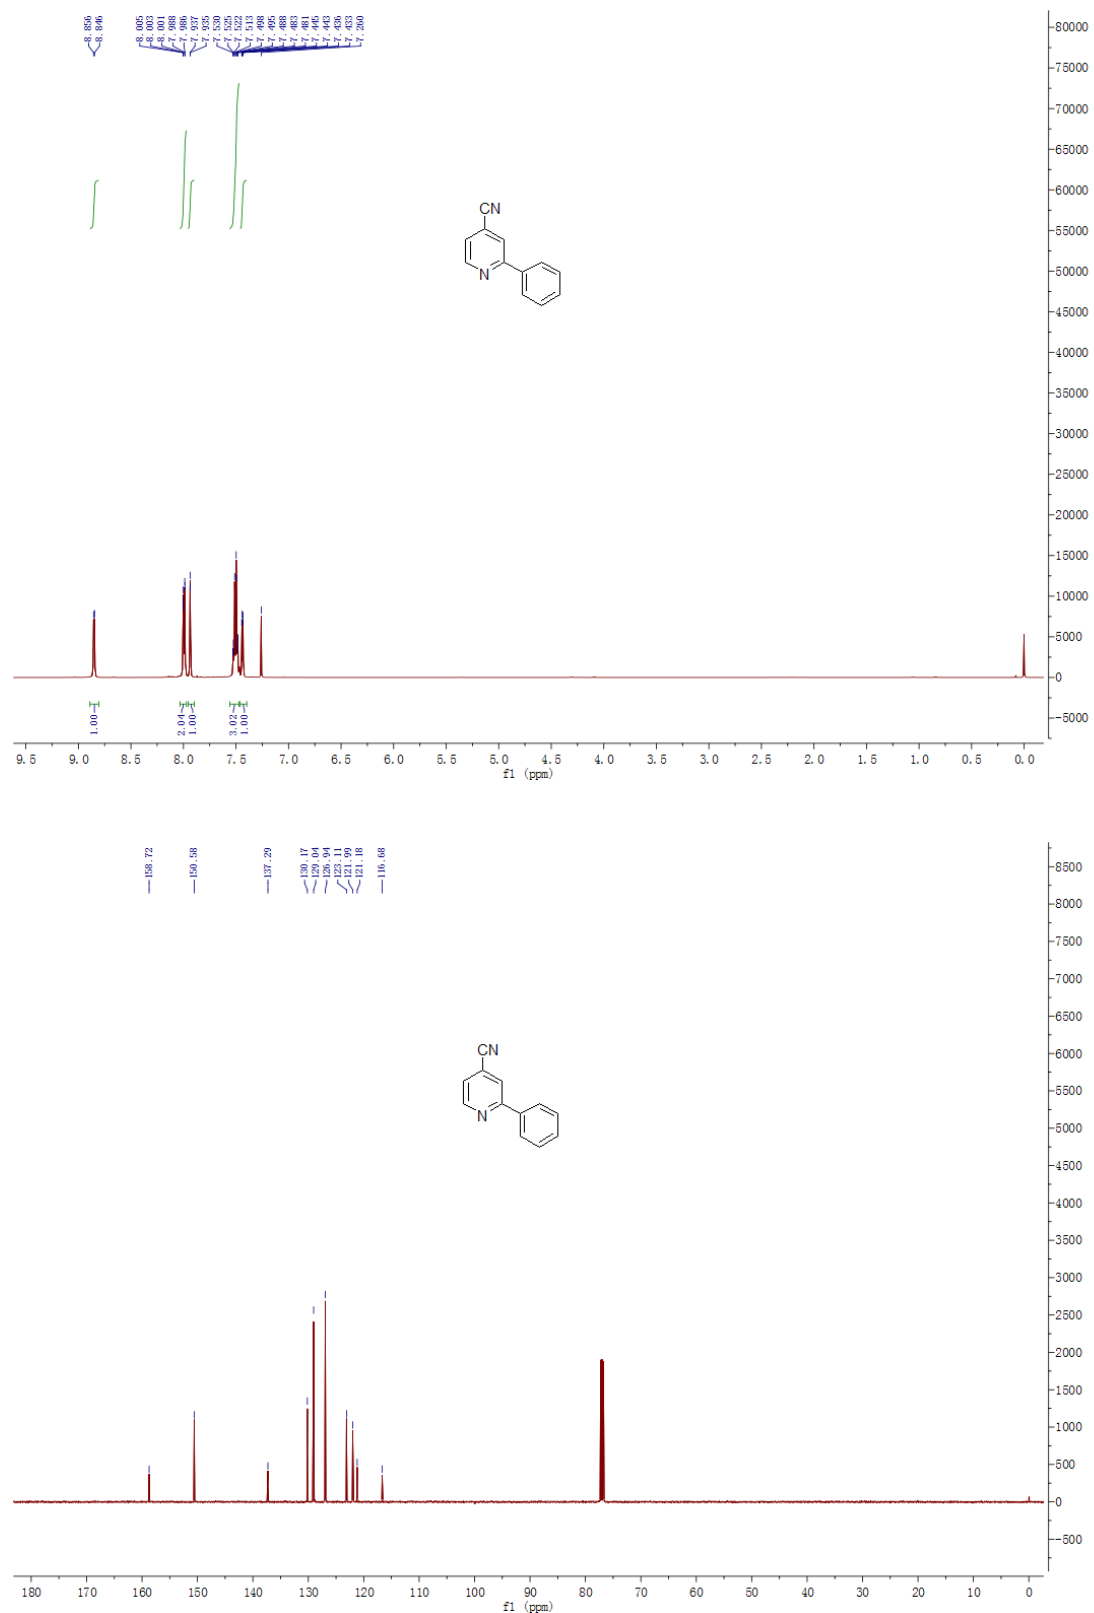

**Figure S30.** <sup>1</sup>H NMR of **3ga** (500 MHz, CDCl<sub>3</sub>) and <sup>13</sup>C NMR of **3ga** (125 MHz, CDCl<sub>3</sub>).

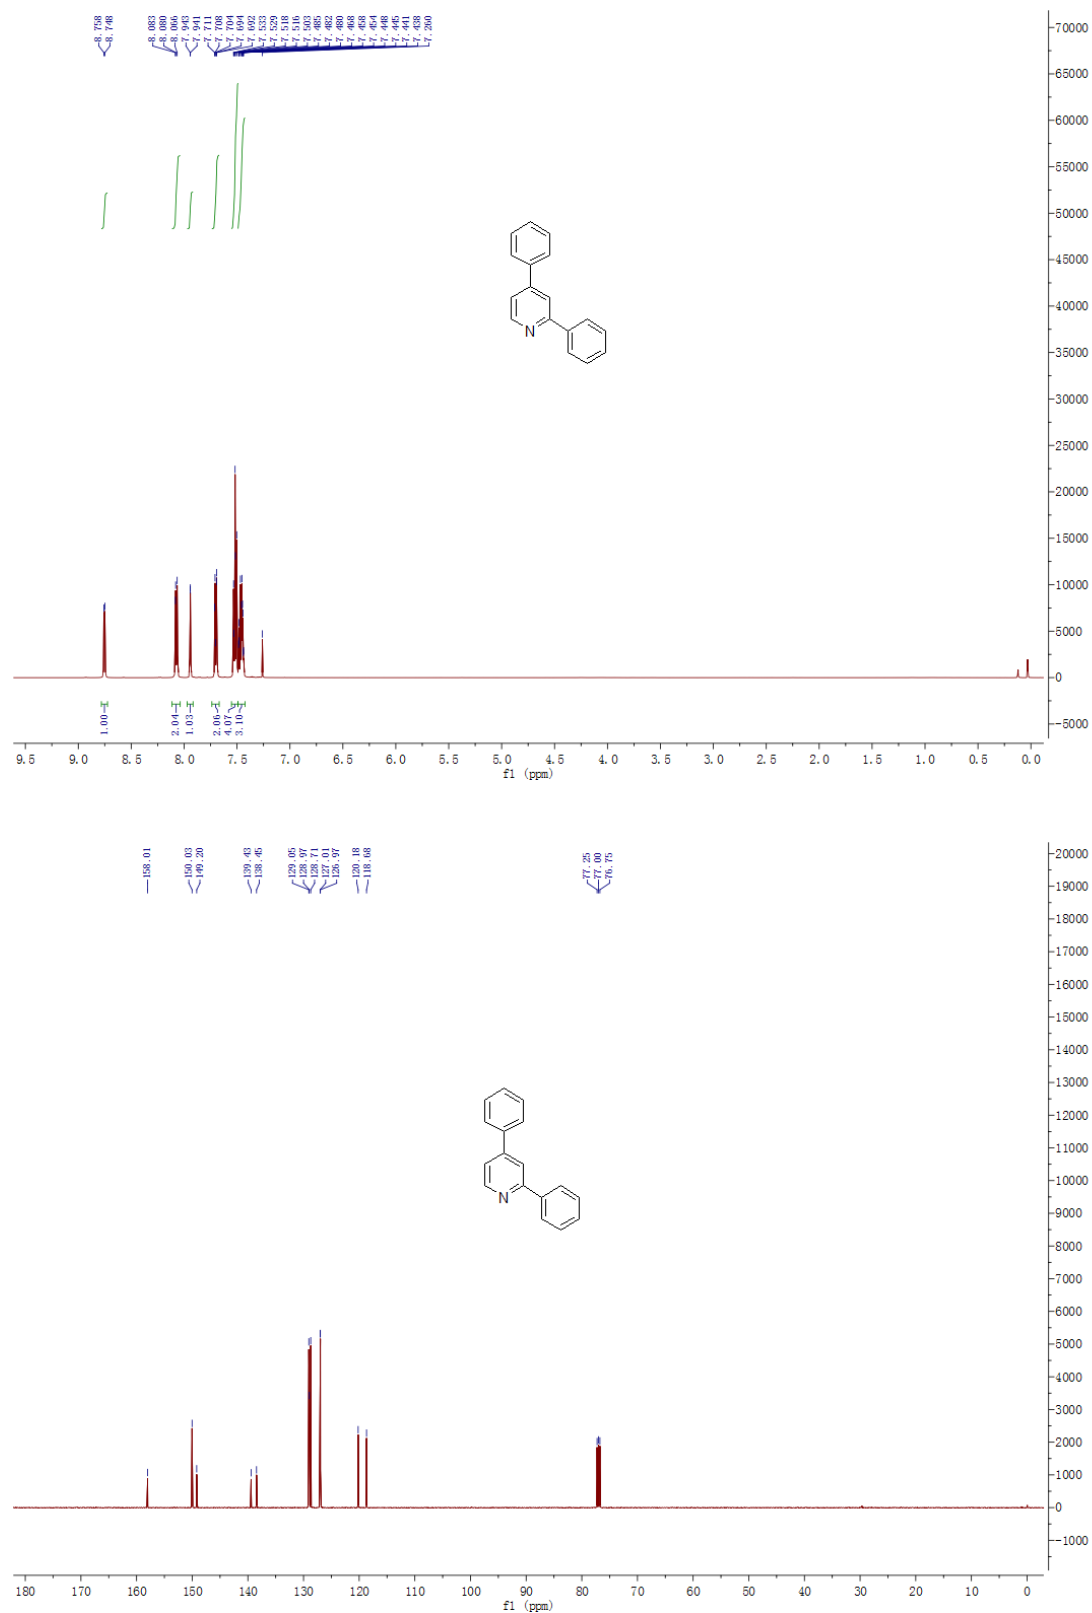

**Figure S31.** <sup>1</sup>H NMR of **3ha** (500 MHz, CDCl<sub>3</sub>) and <sup>13</sup>C NMR of **3ha** (125 MHz, CDCl<sub>3</sub>).



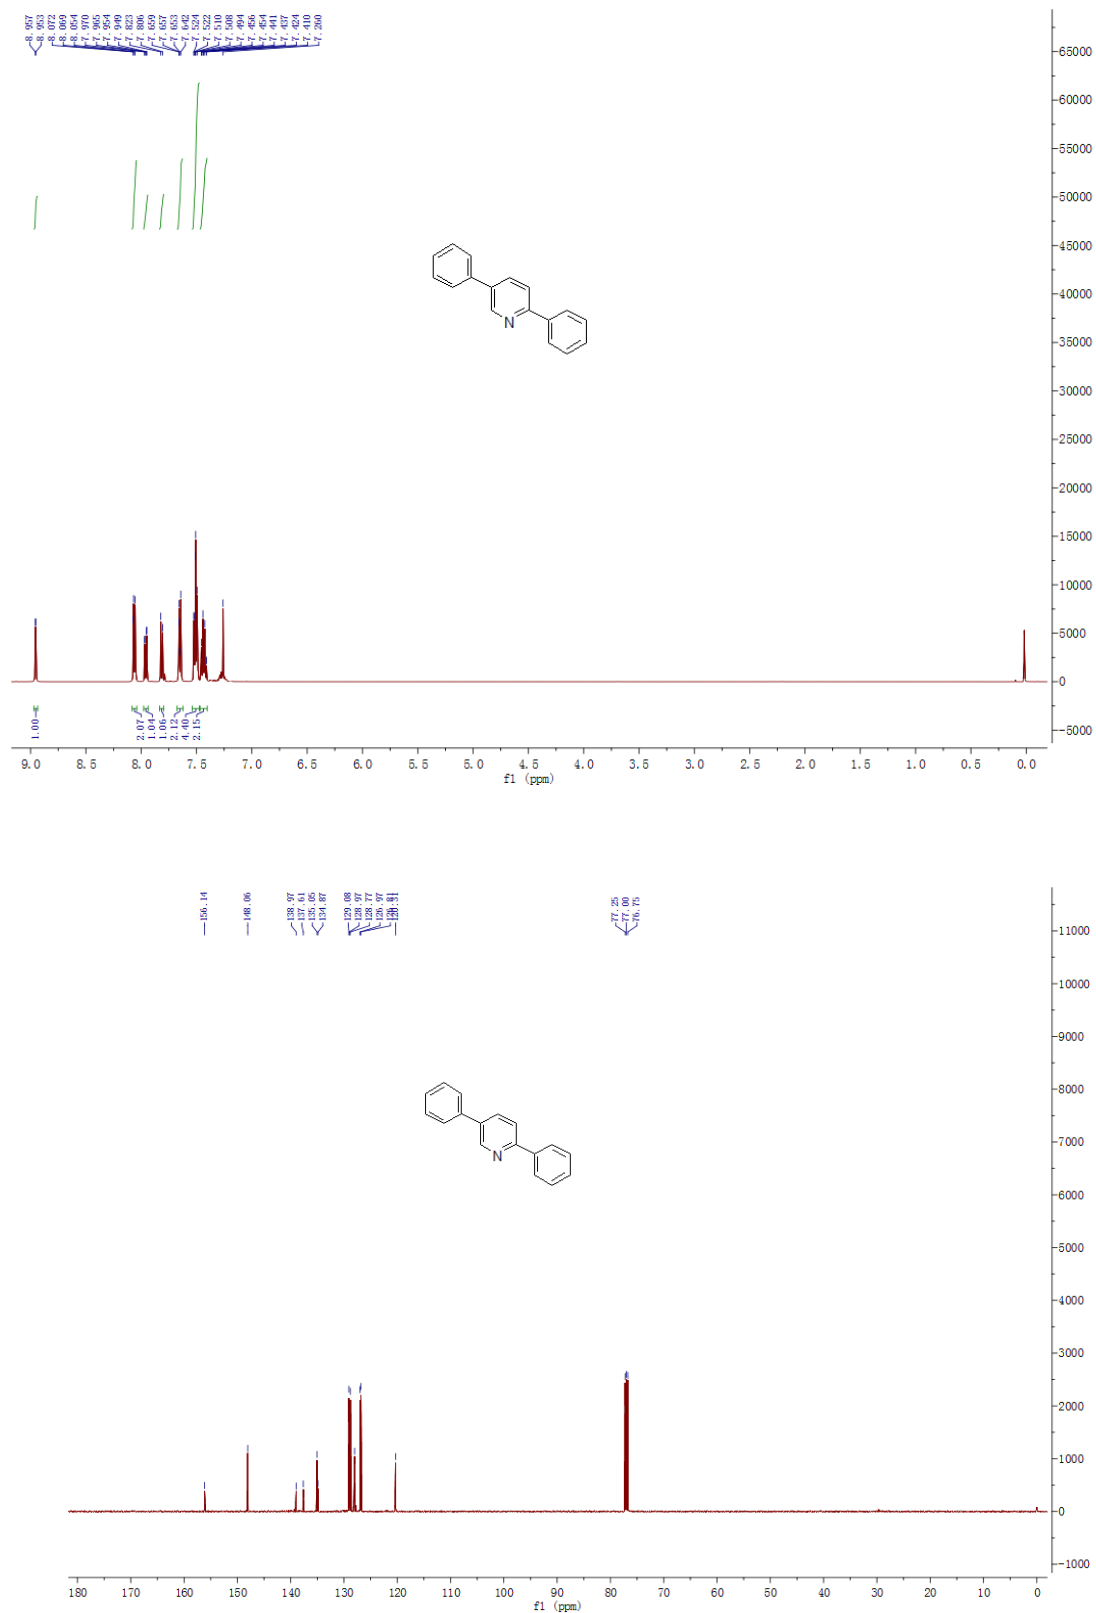

**Figure S32.** <sup>1</sup>H NMR of **3ia** (500 MHz, CDCl<sub>3</sub>) and <sup>13</sup>C NMR of **3ia** (125 MHz, CDCl<sub>3</sub>).
